# Supplementary material for: Disassembly of the TRIM56-ATR complex promotes cytoDNA/cGAS/STING axis–dependent intervertebral disc inflammatory degeneration
Source: PubMed Central journal article supplement (PMC10940101; doi:10.1172/jci165140), 2024-01-23

**Figure 1E**

$\gamma$ H2A

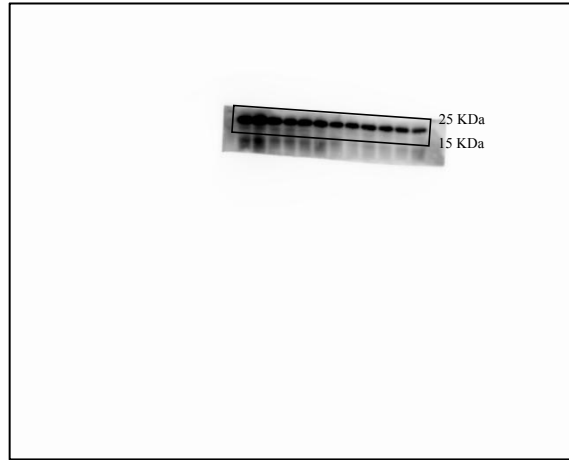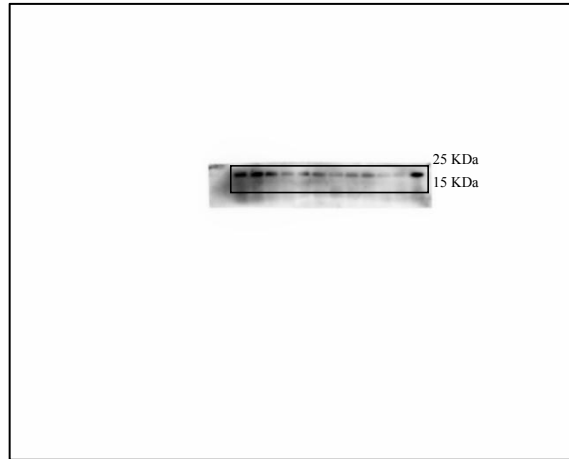

p-p53

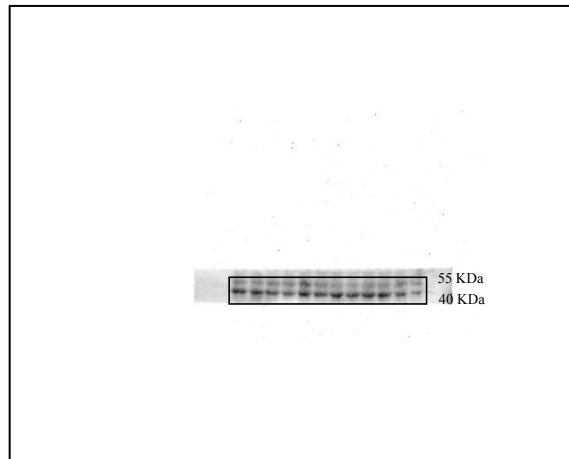

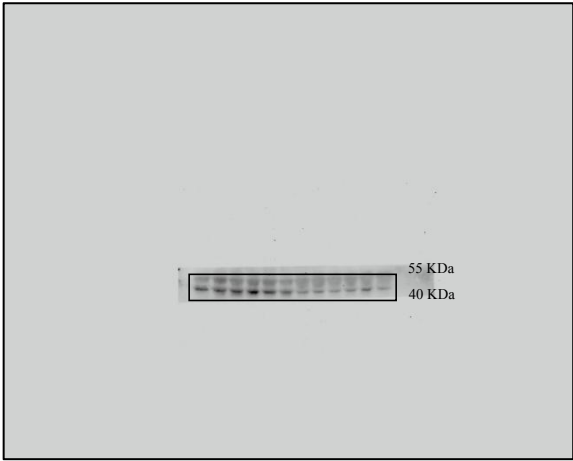

p21

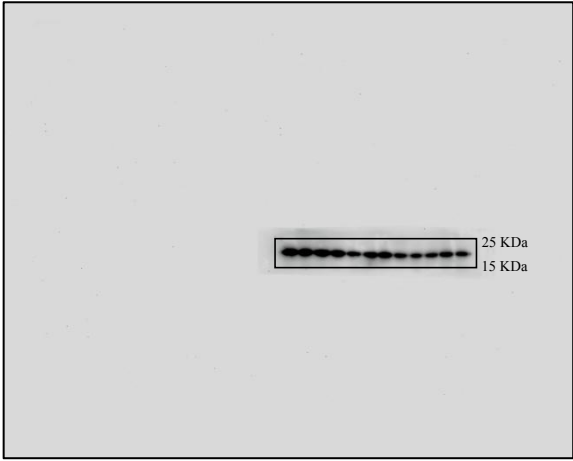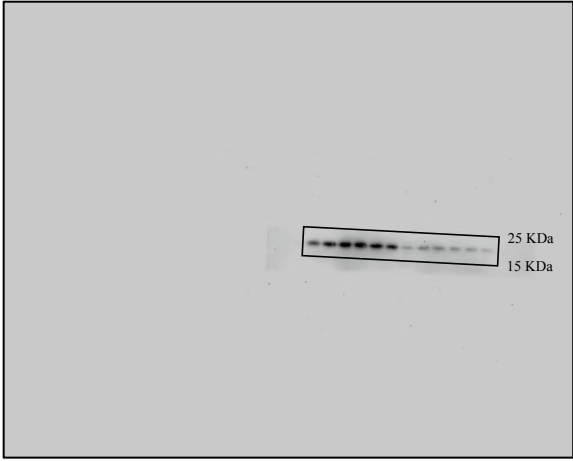

p16

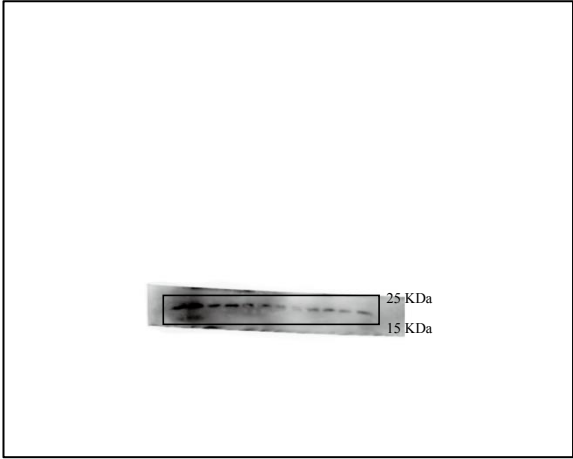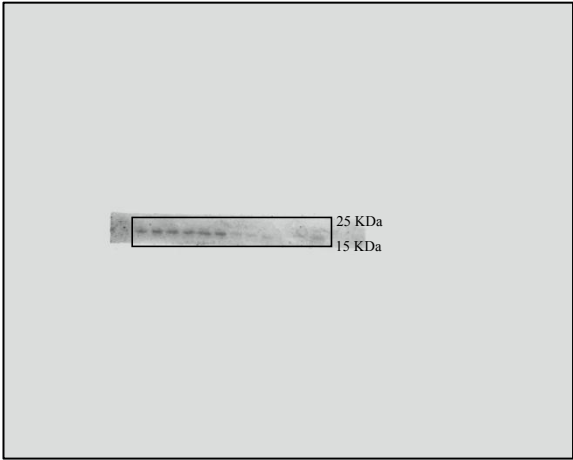

GAPDH

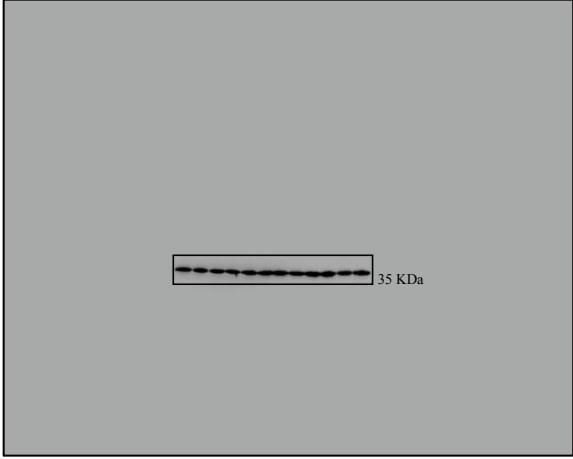

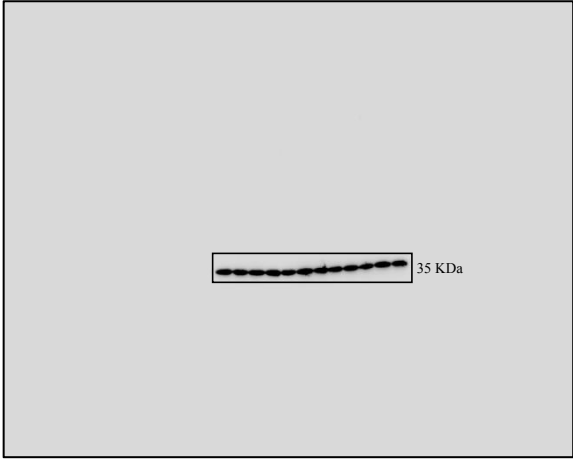

**Figure 1G**

p-p53

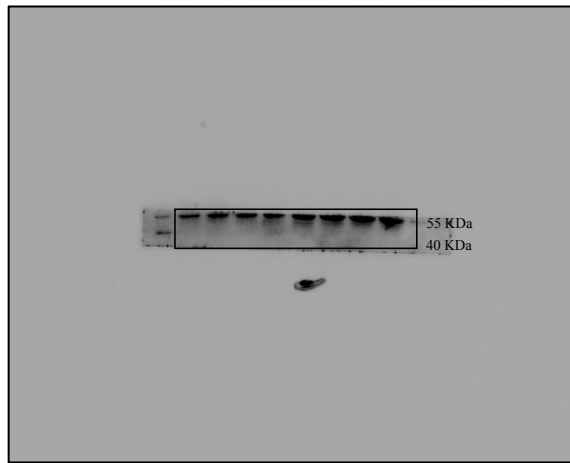

p21

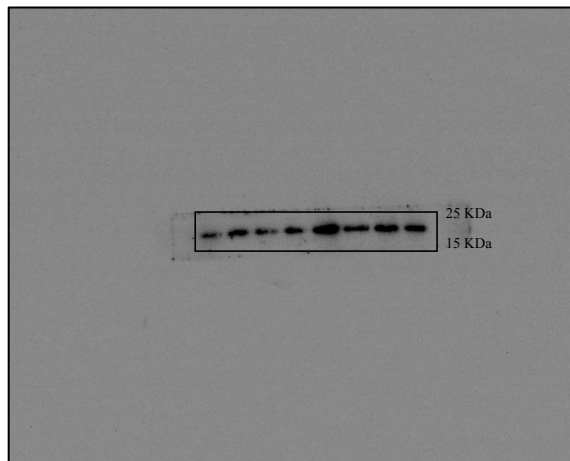

p16

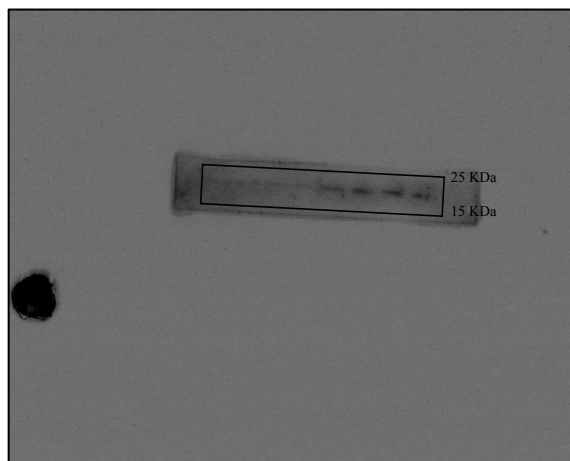

GAPDH

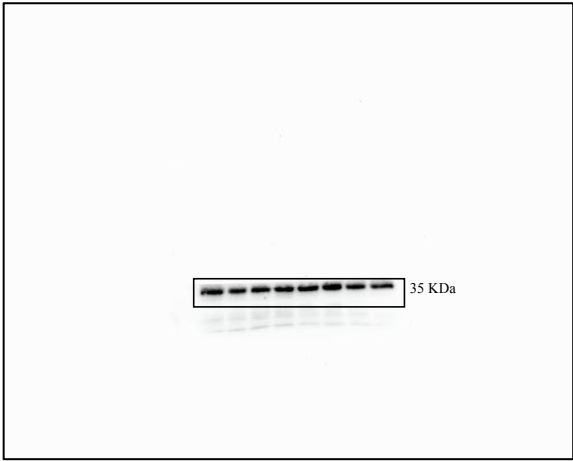

53BP

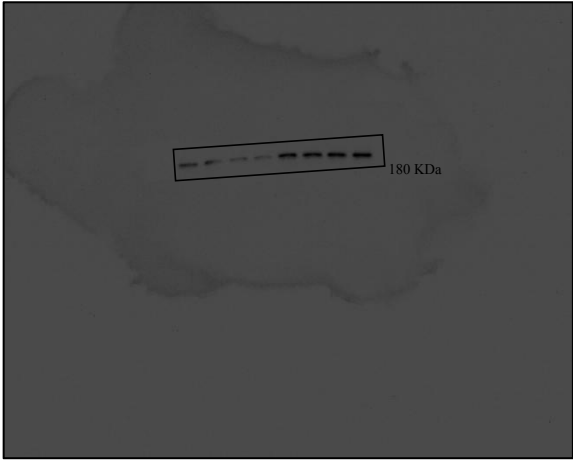

$\gamma$ H2A

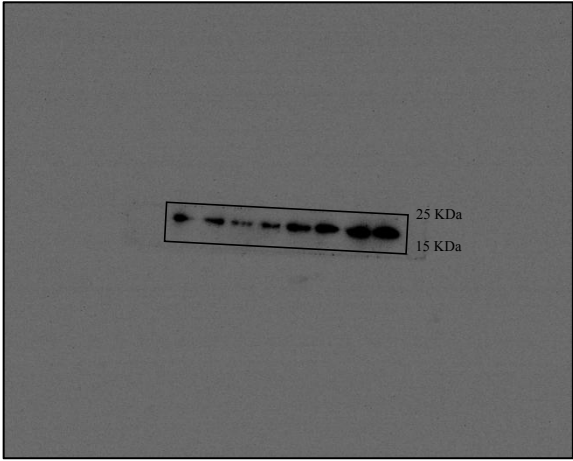

GAPDH

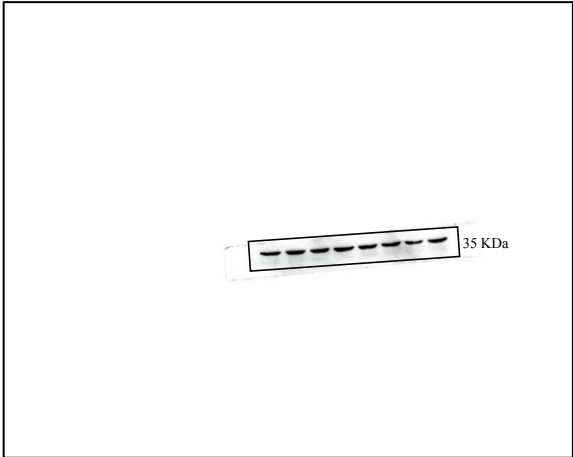

**Figure 3H**

p-p53 (Ser)

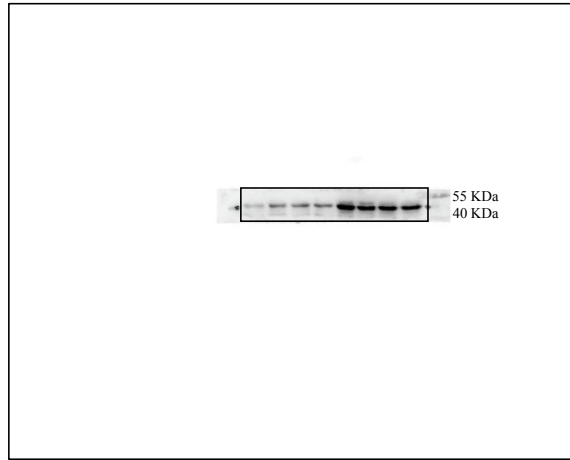

p21

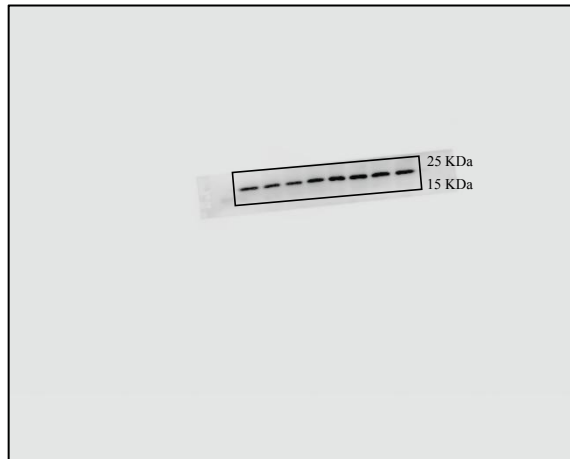

p16

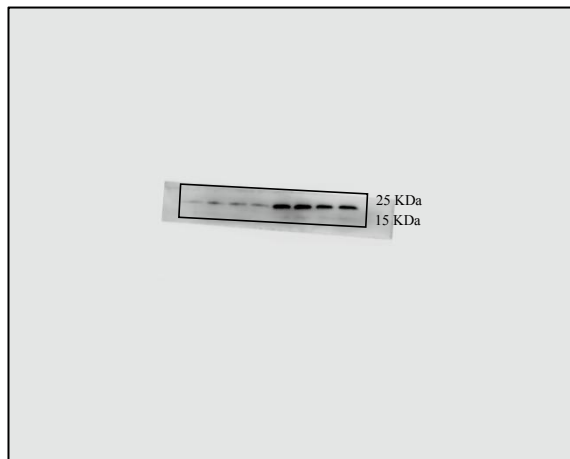

GAPDH



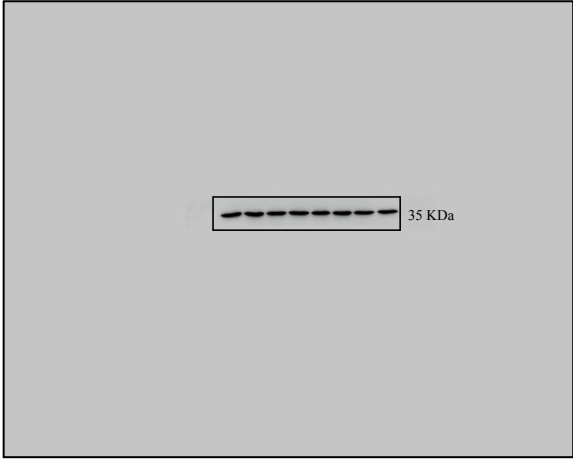

**Figure 3I**

53BP

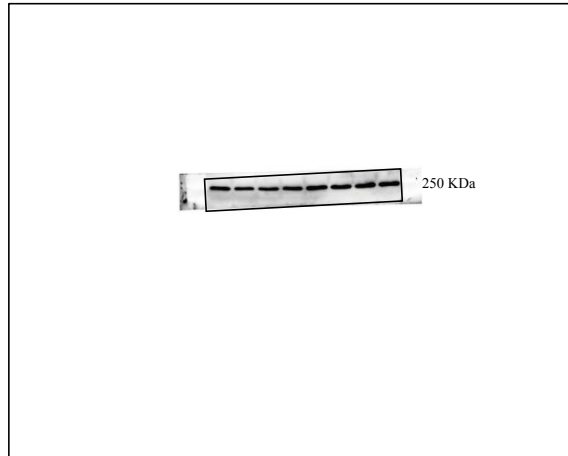

$\gamma$ H2A

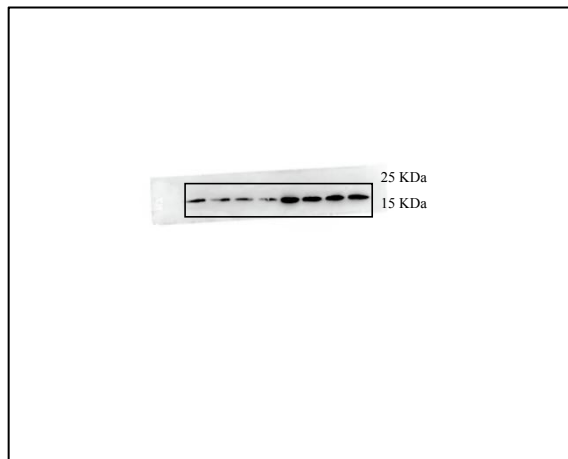

GAPDH

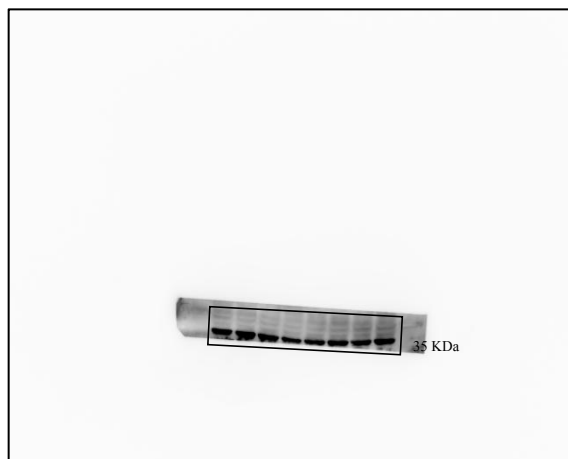

**Figure 4B**

gDNA: LAD12

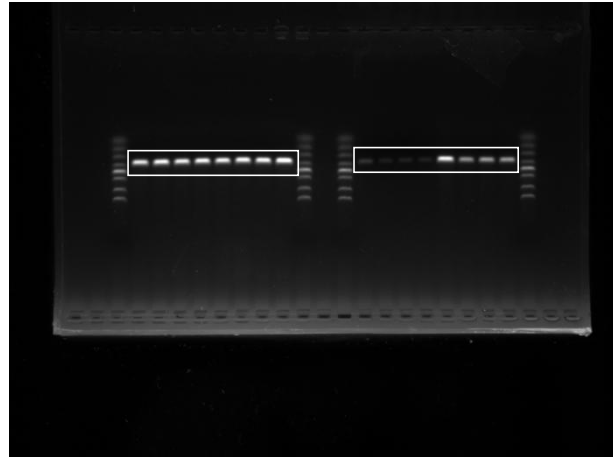

gDNA: 18S RNA

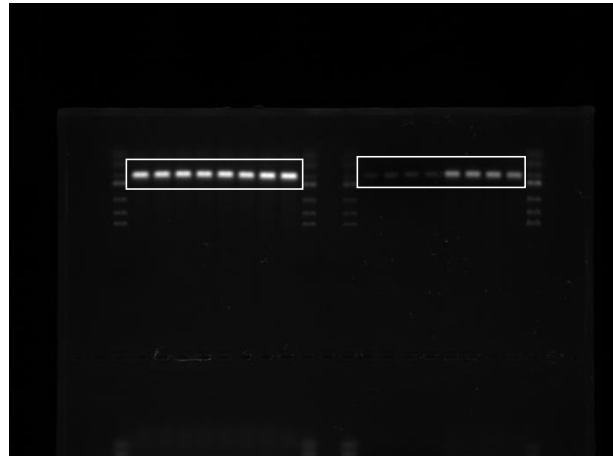

gDNA: POLG1; L1OFR1

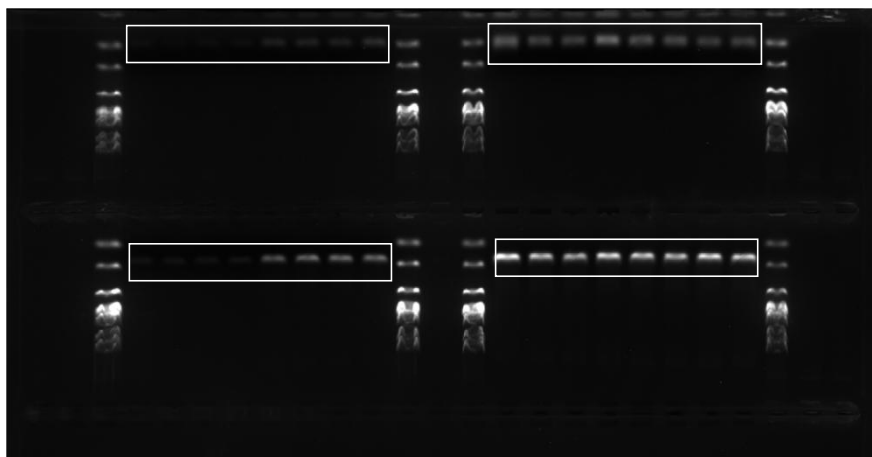

**Figure 4E**

cGAS

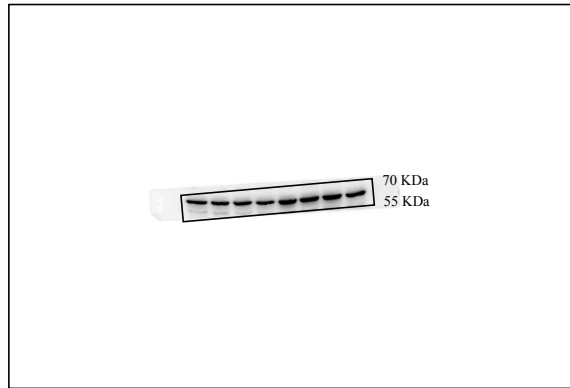

p-STING

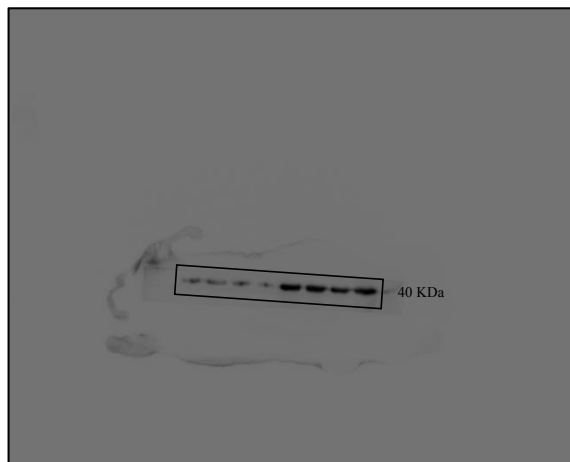

STING

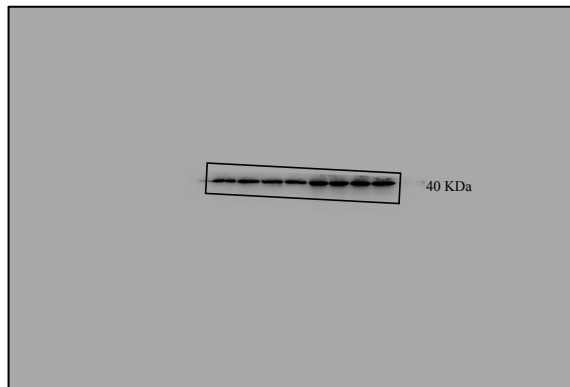

AIM2

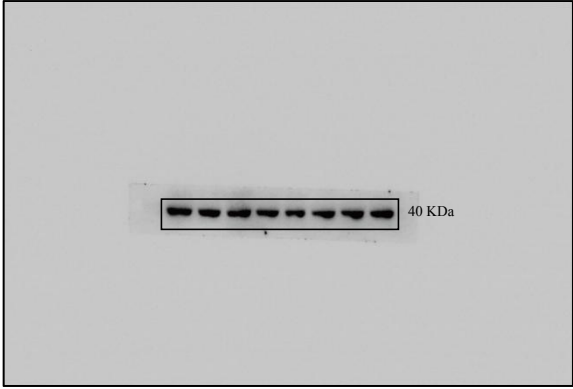

GAPDH

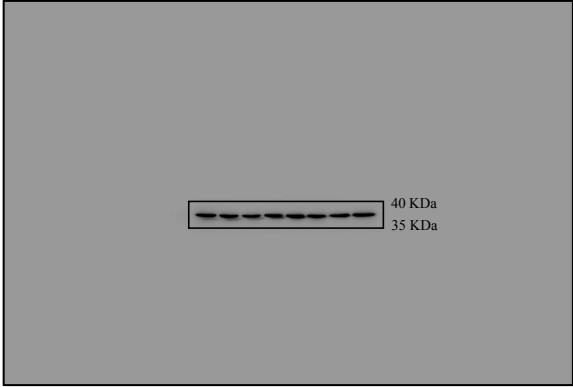

**Figure 4I**

cGAS

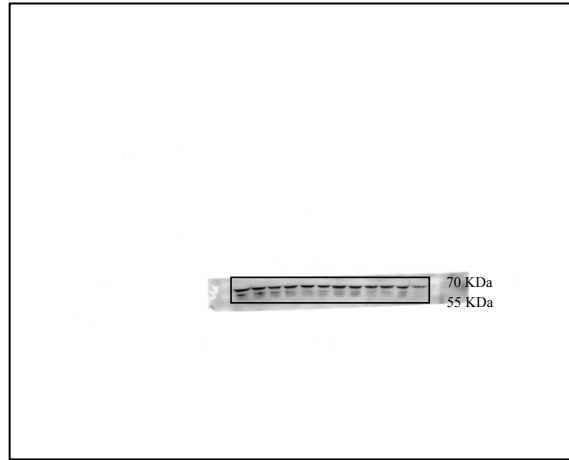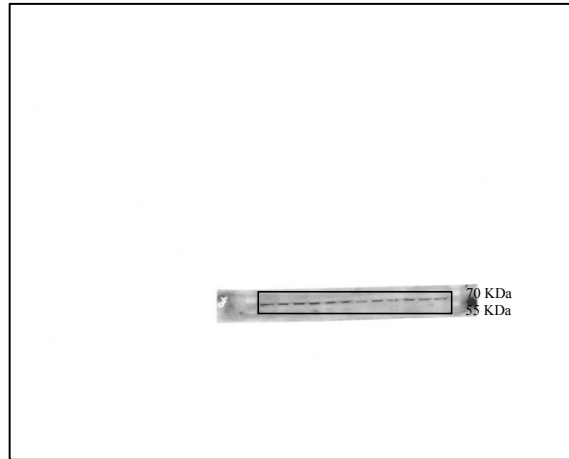

p-STING

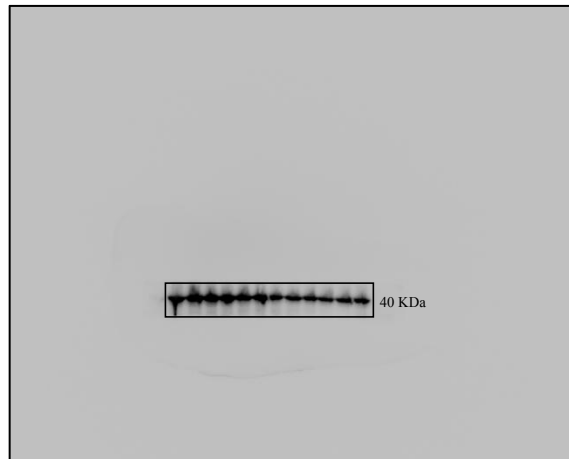

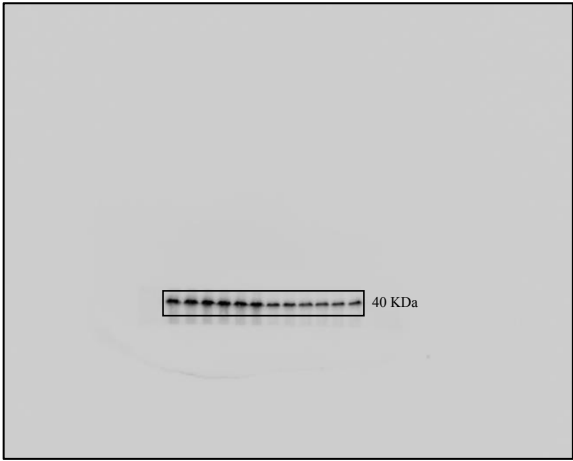

STING

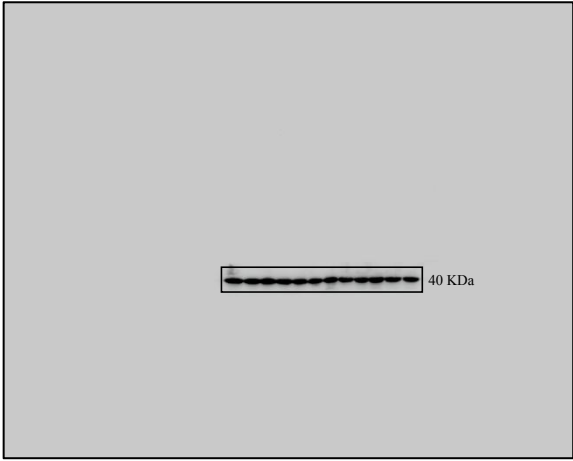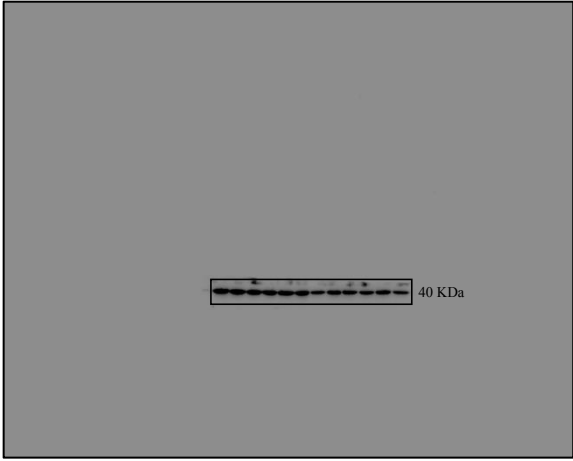

GAPDH

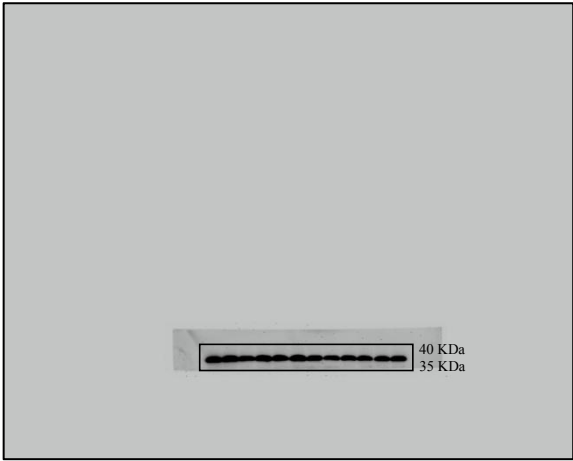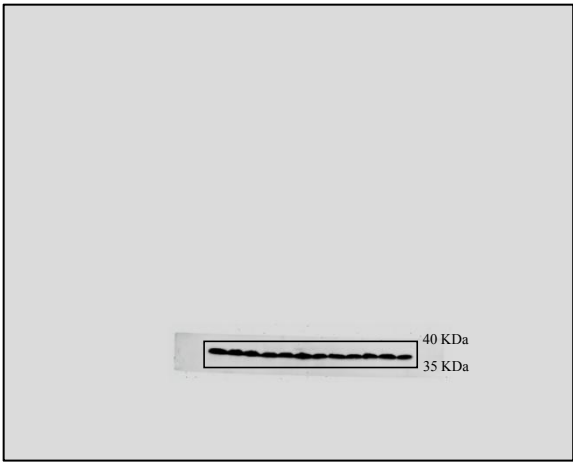



**Figure 6B**

ATR

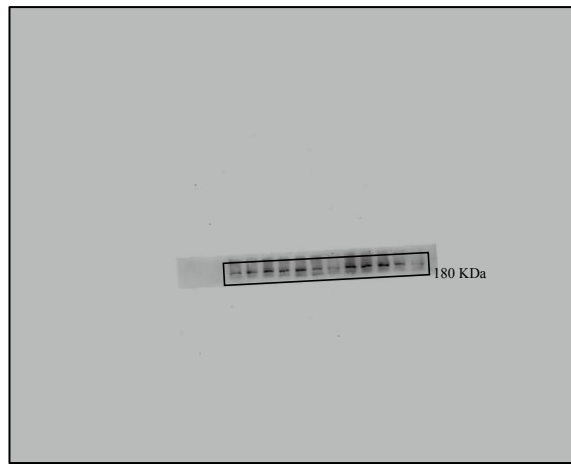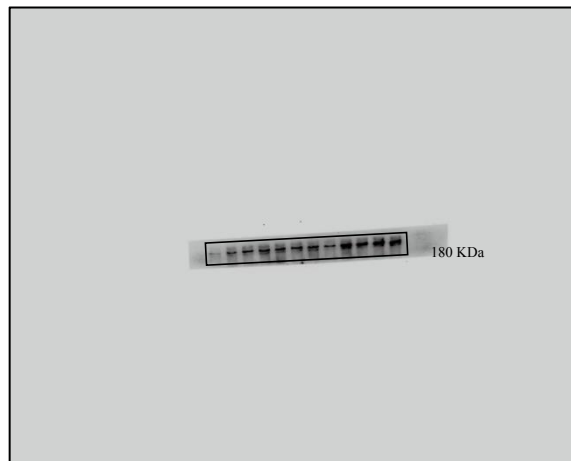

GAPDH

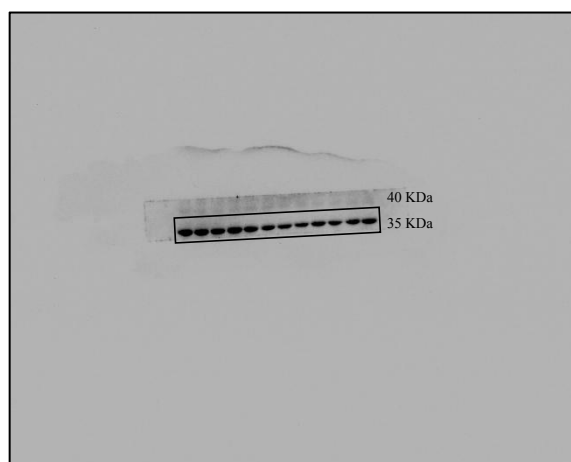

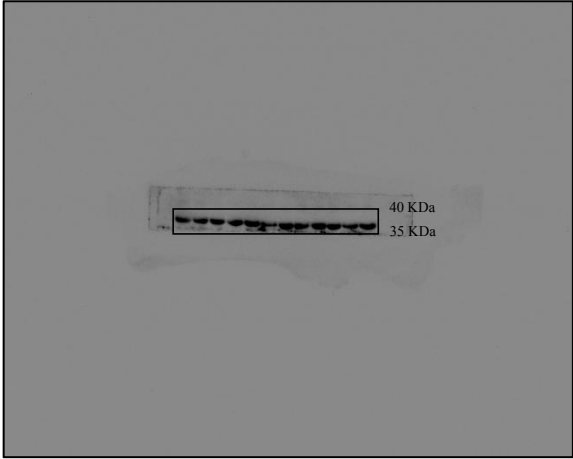

**Figure 6C**

ATR

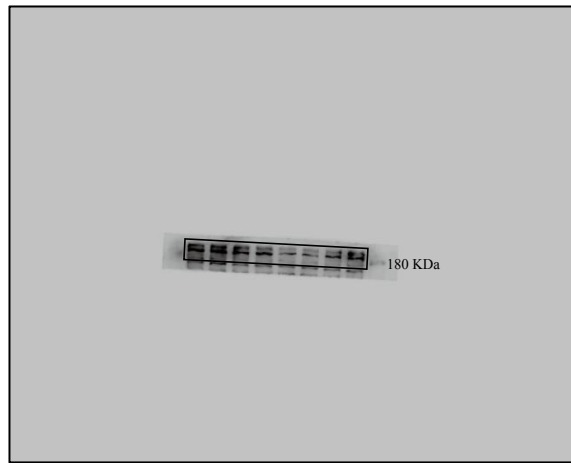

GAPDH

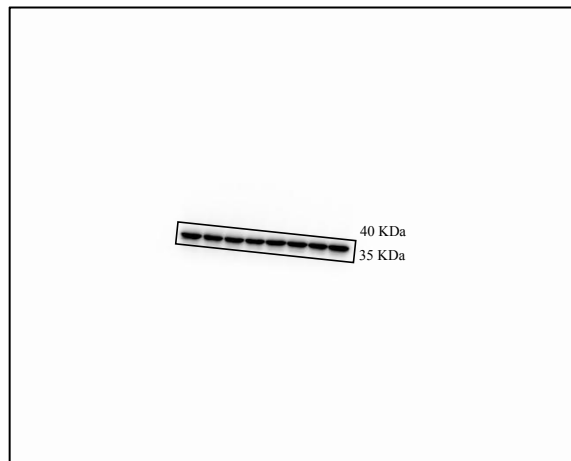

**Figure 6H**

p-p53

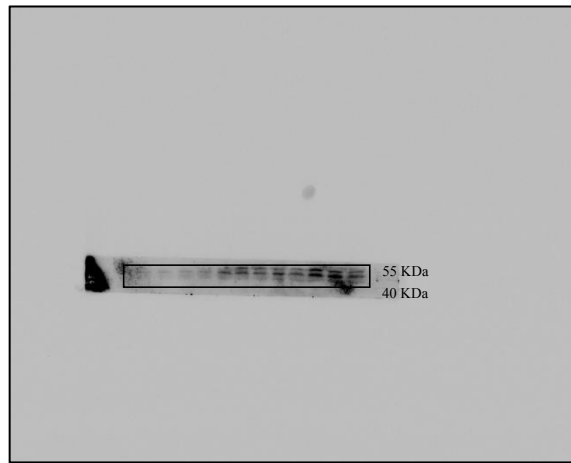

p21

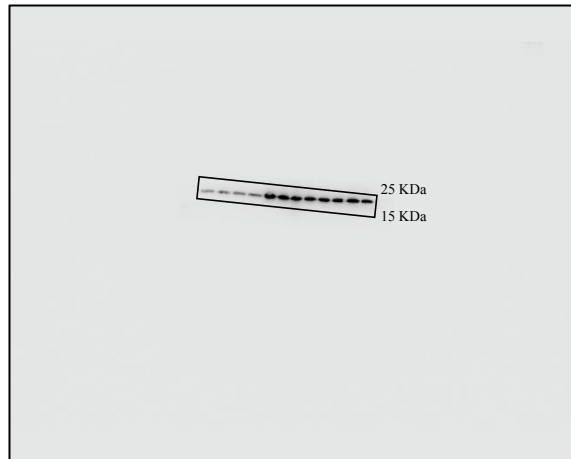

GAPDH

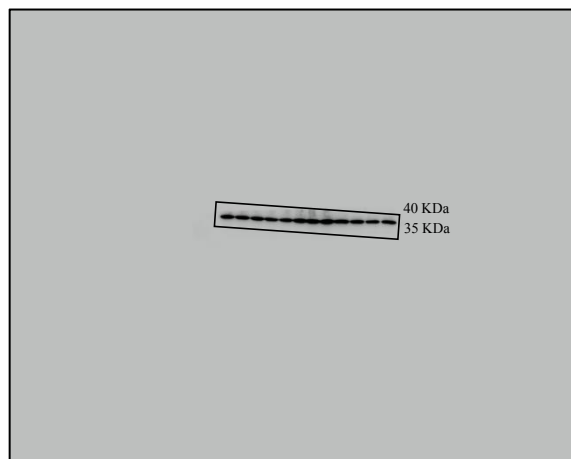

**Figure 6I**

cGAS

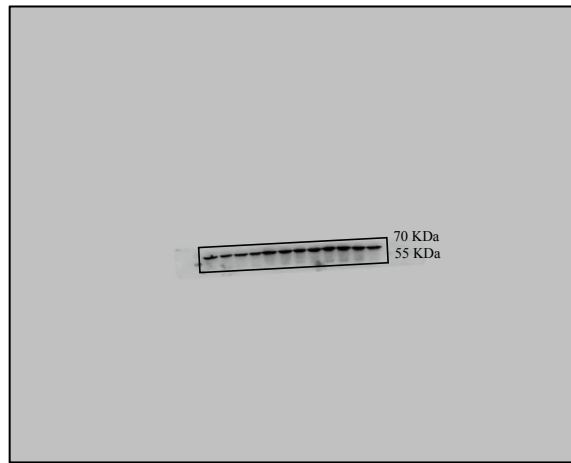

STING

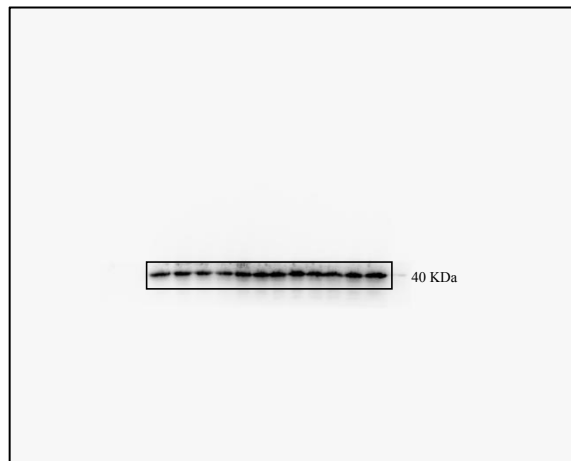

$\gamma$ H2A

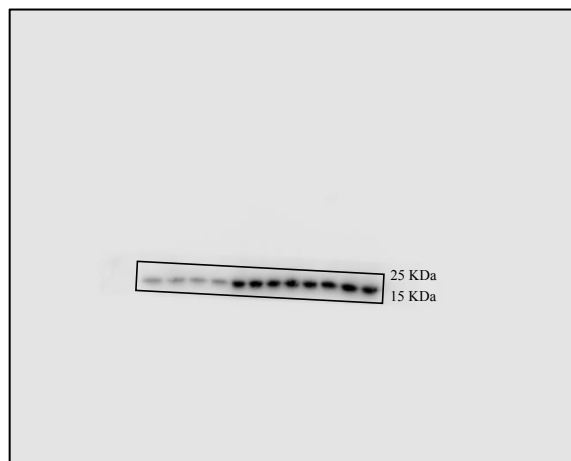

GAPDH

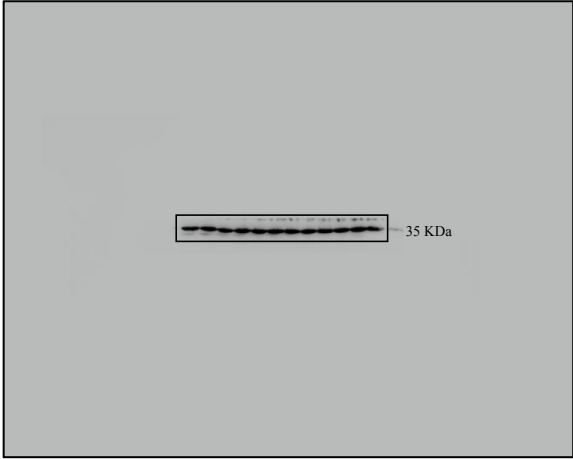

**Figure 7D**

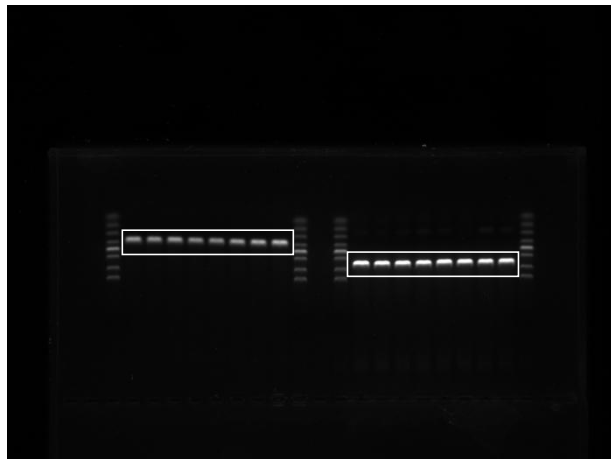

**Figure 7E**

ATR

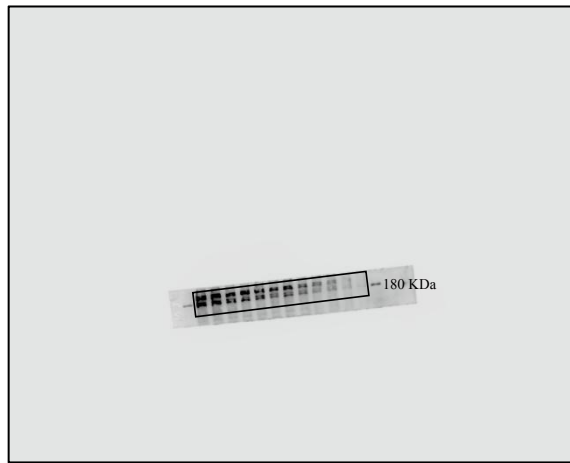

GAPDH

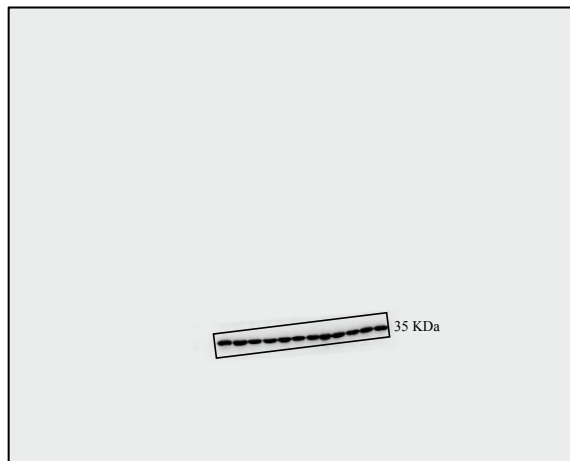



**Figure 7F**

ATR

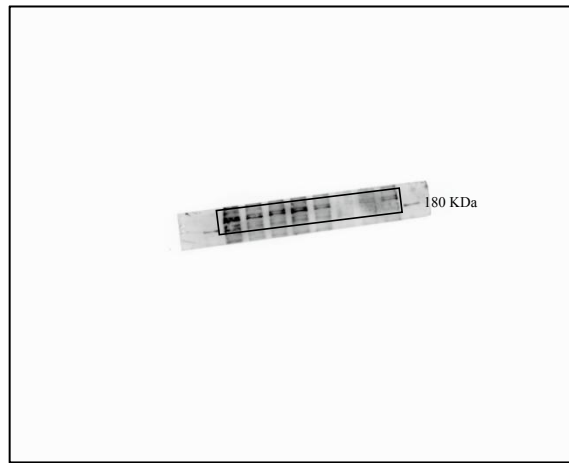

GAPDH

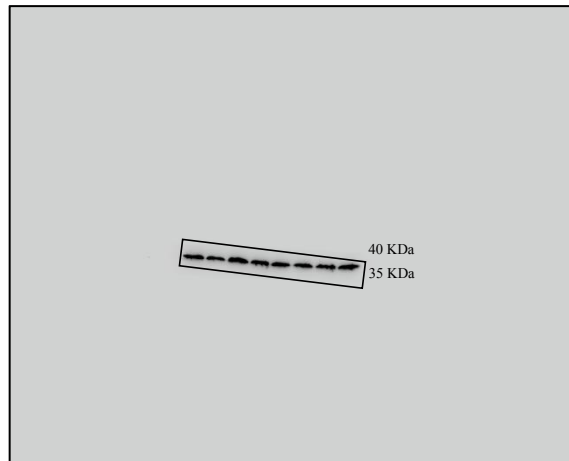

**Figure 7G**

IB: ATR

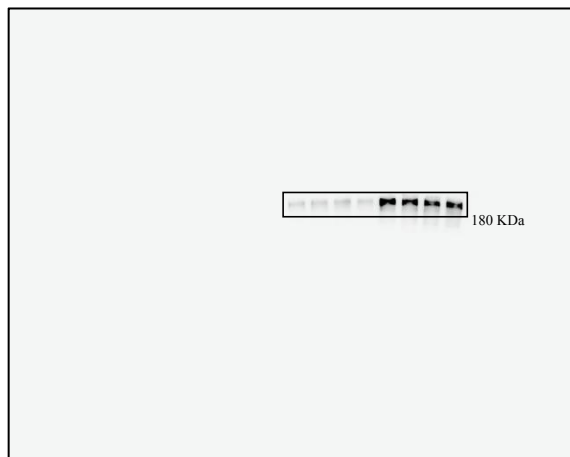

IB: Ub

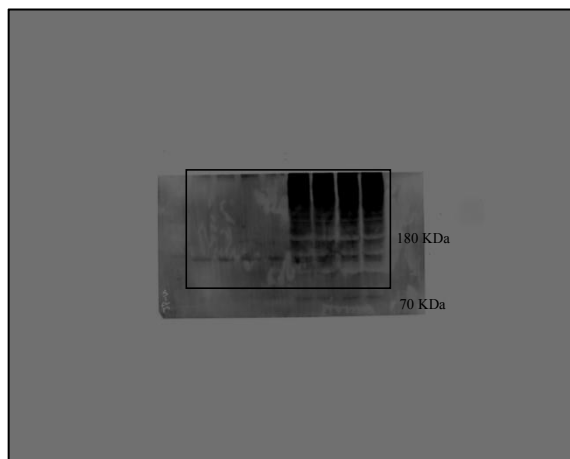

Input: ATR

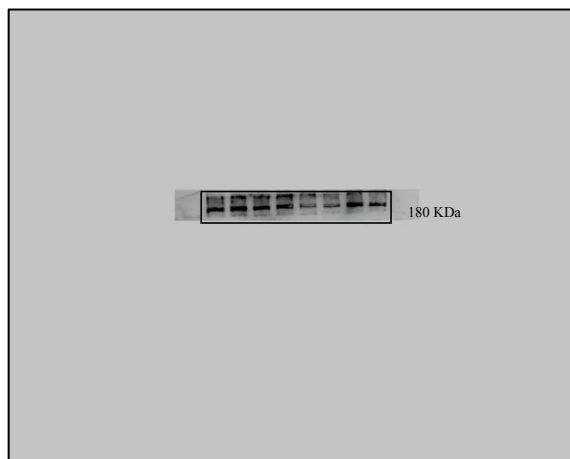

Input: Ub

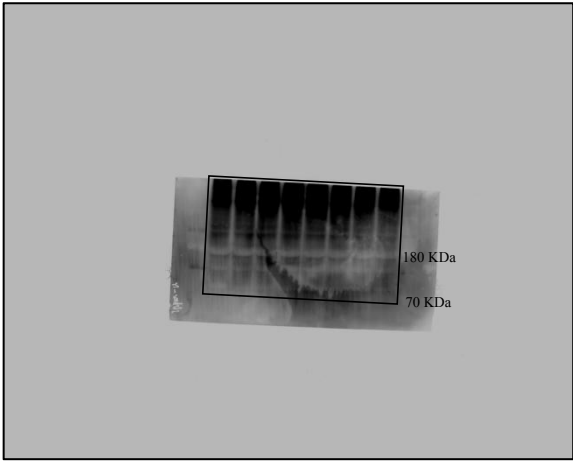

Input: GAPDH

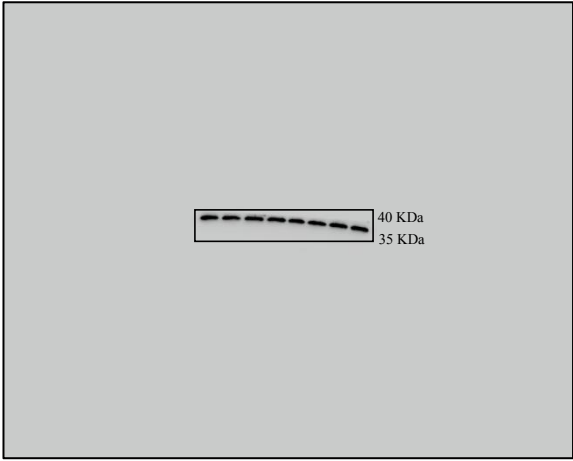

**Figure 7H**

IB: ATR

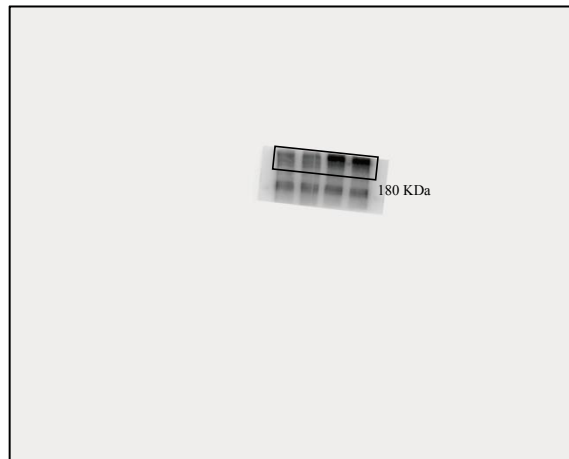

IB: K48-Ub

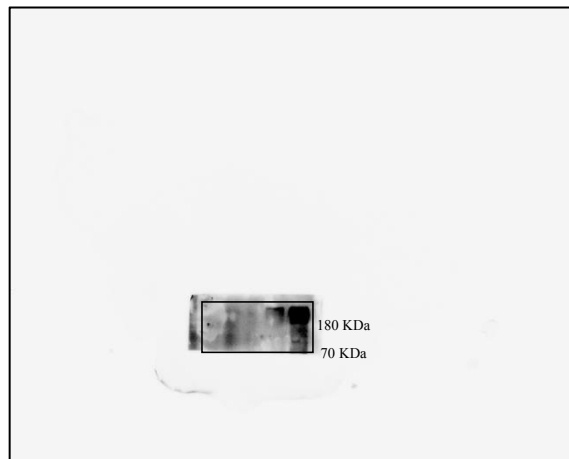

K63-Ub

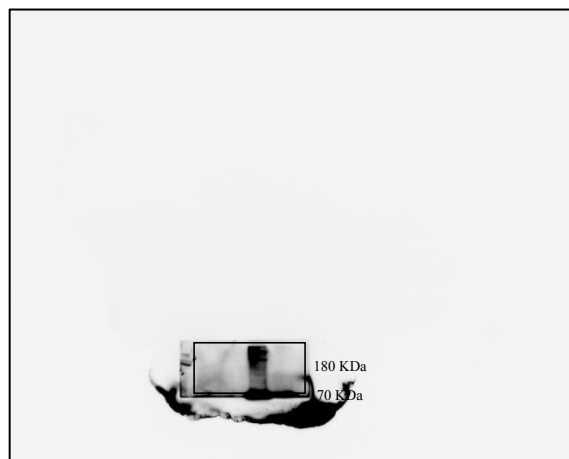

Input: ATR

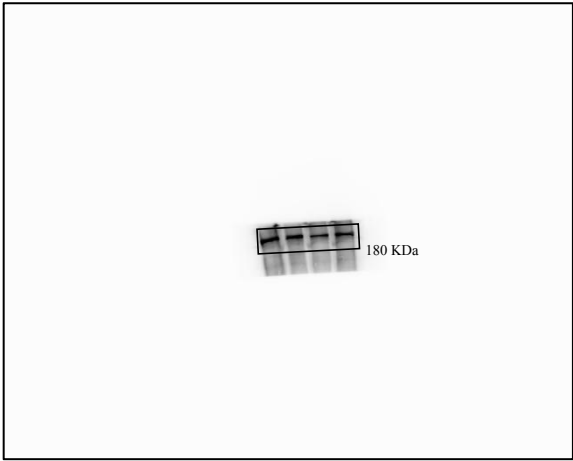

Input: K48-Ub

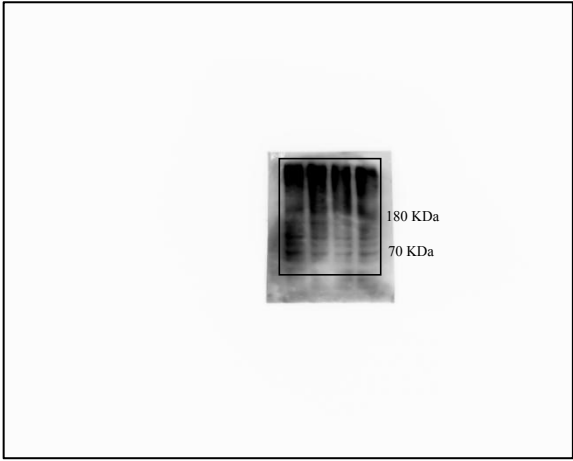

Input: K63-Ub

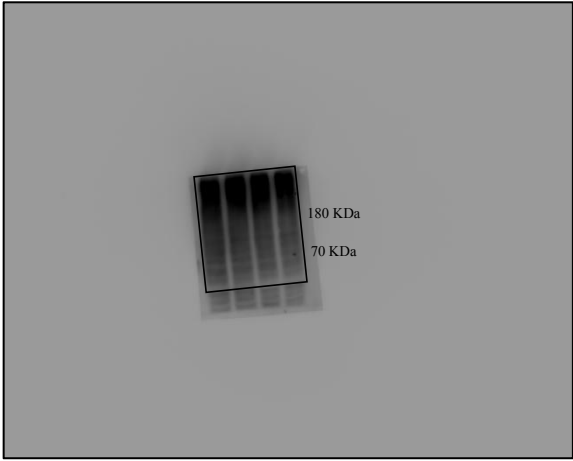

Input: GAPDH

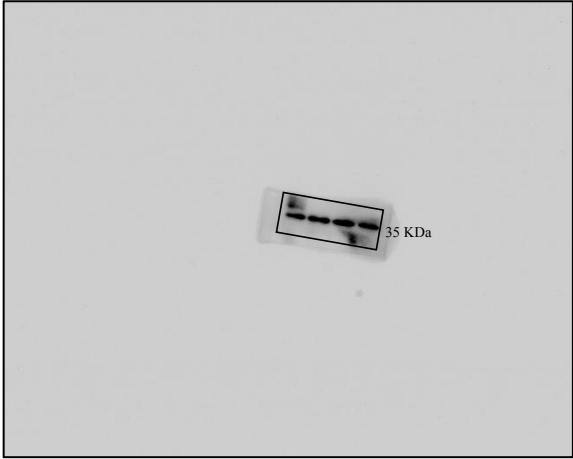

**Figure 7I**

ATR-1

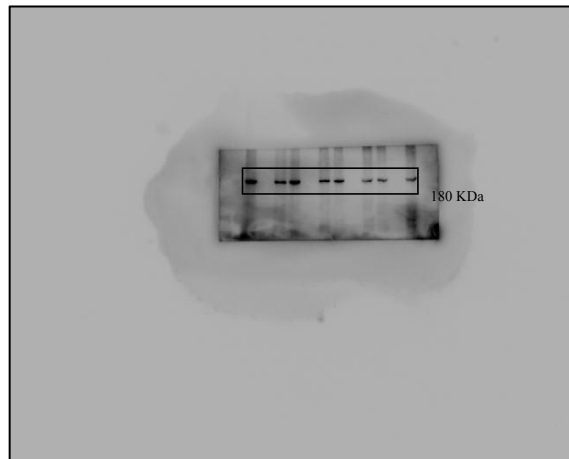

Ub-1

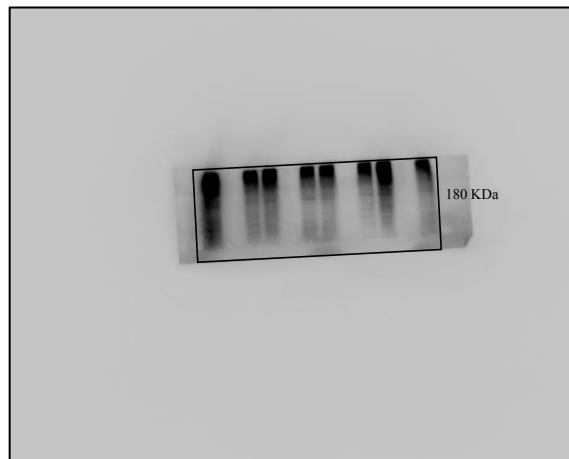

K63-Ub-1

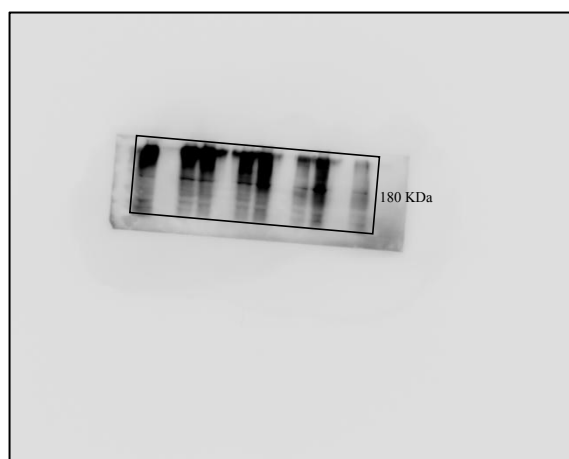

K48-Ub-1

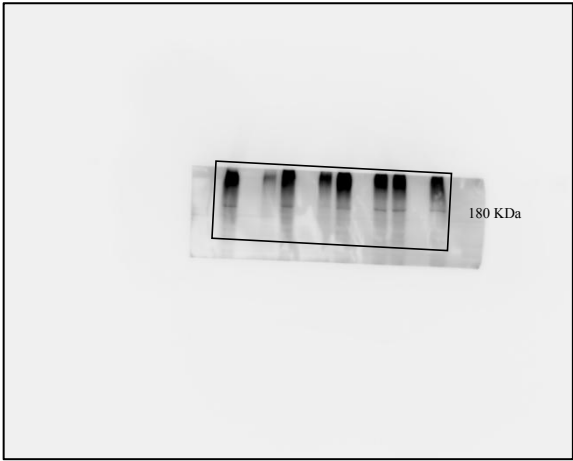

GAPDH-1

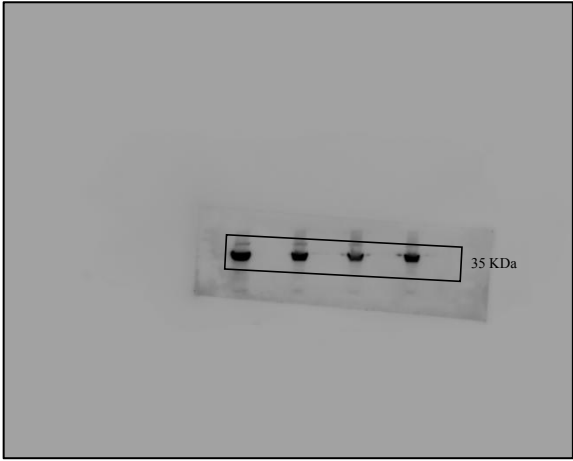

ATR-2

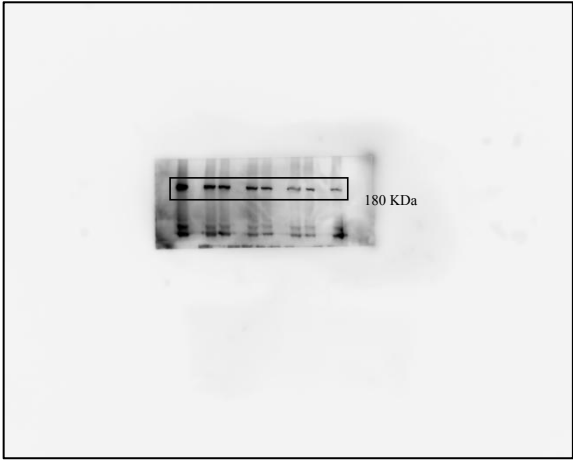

Ub-2



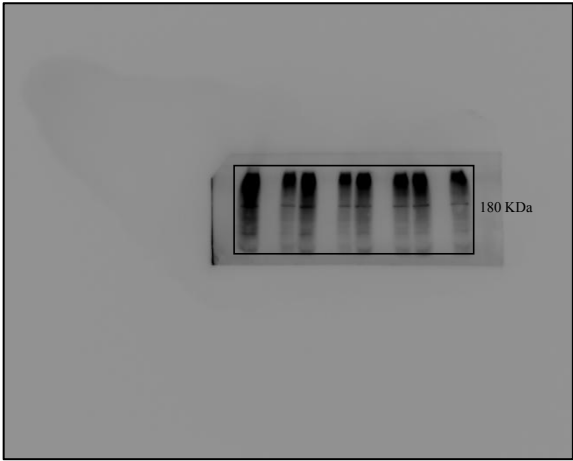

K63-Ub-2

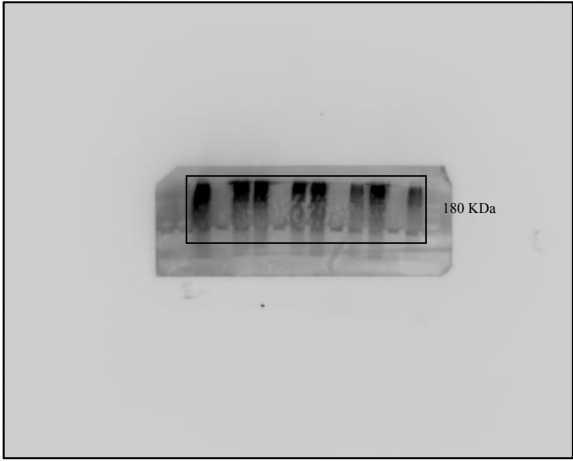

K48-Ub-2

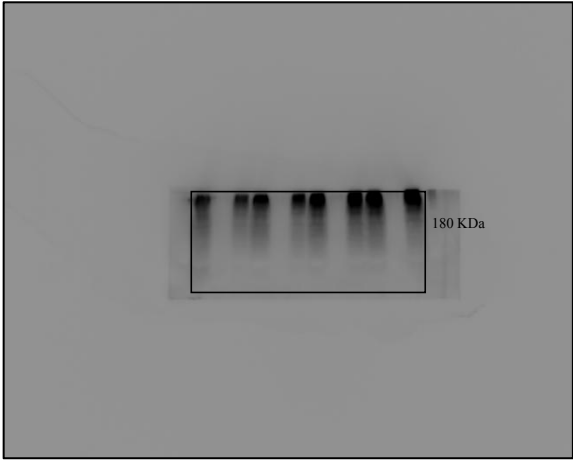

GAPDH-2

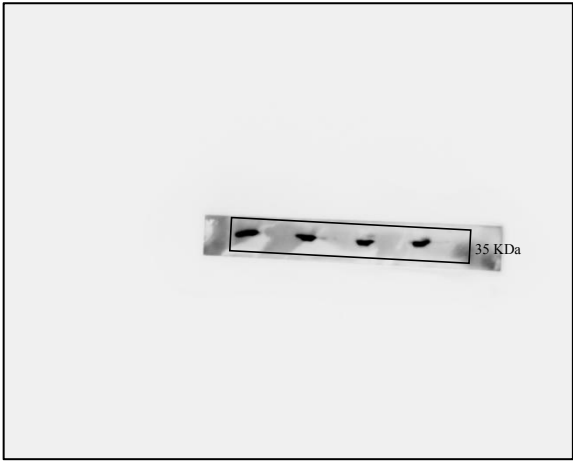

ATR-3

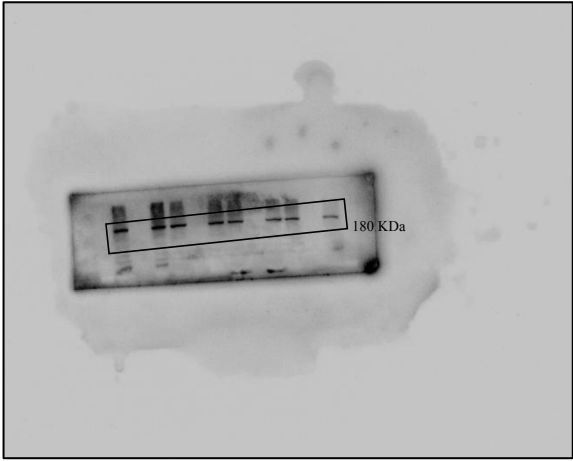

Ub-3

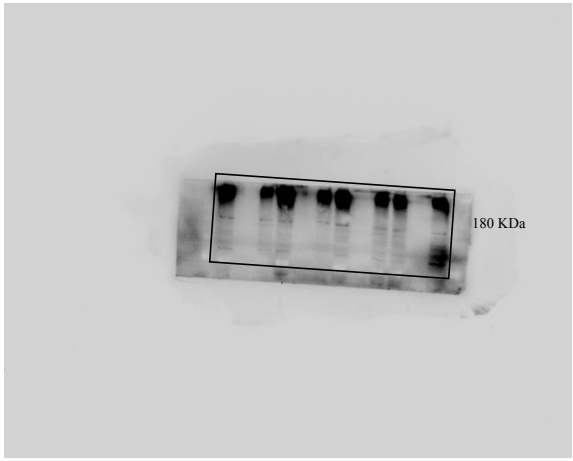

K63-Ub-3

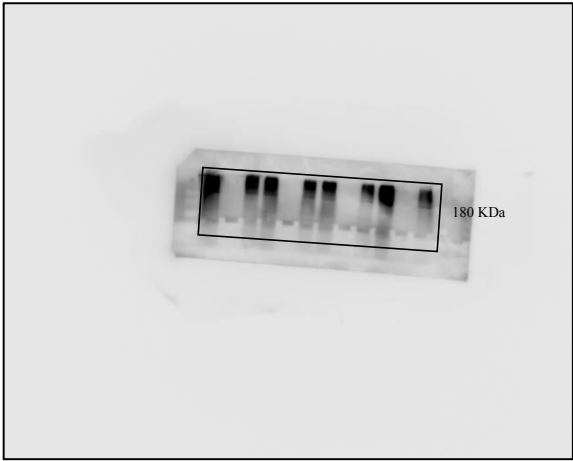

K48-Ub-3

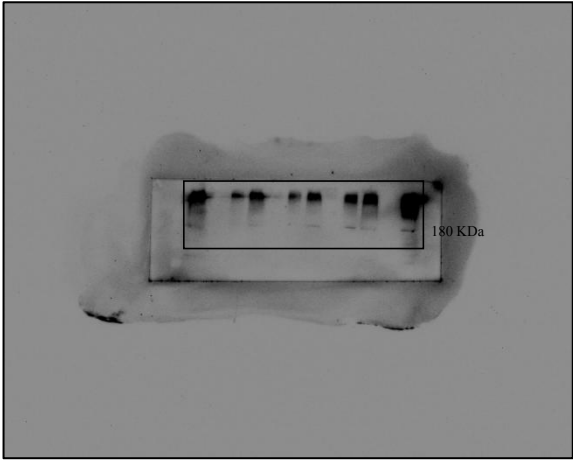

GAPDH-3

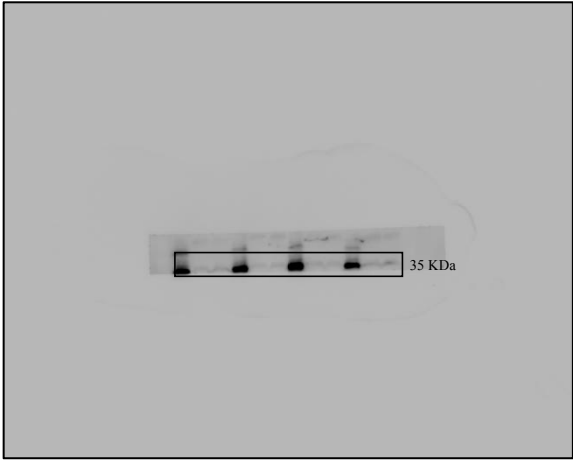

**Figure 8D**

IB: Flag

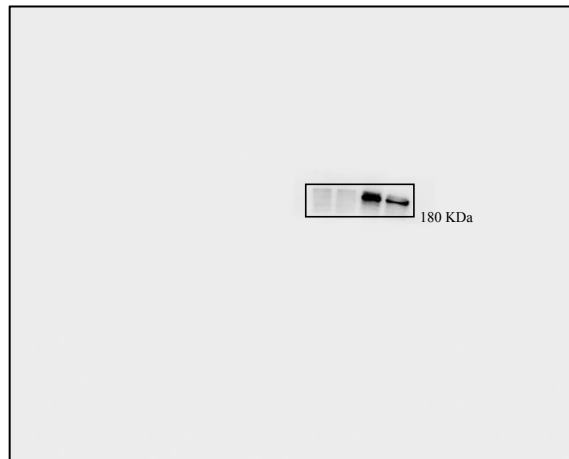

IB: Myc

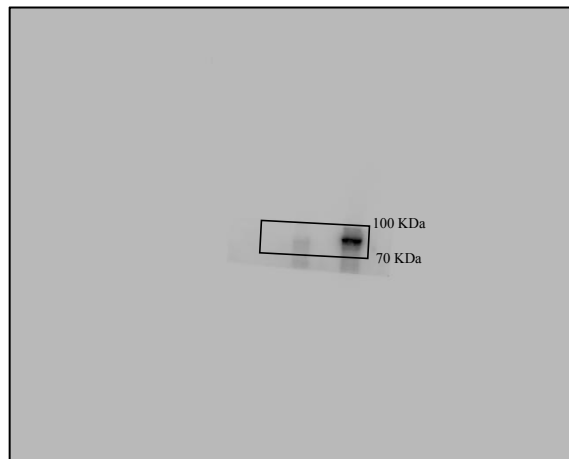

Input: Flag

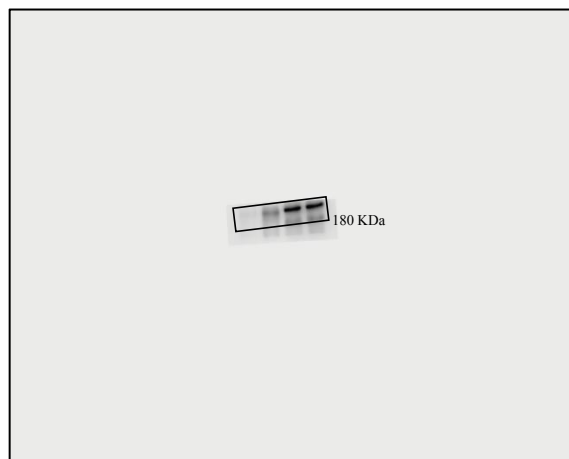

Input: Myc

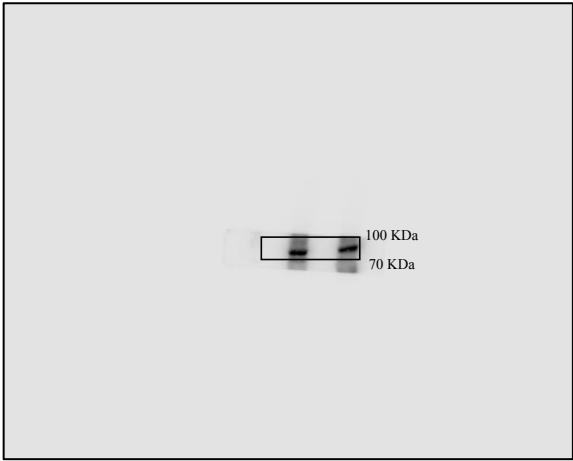

Input: GAPDH

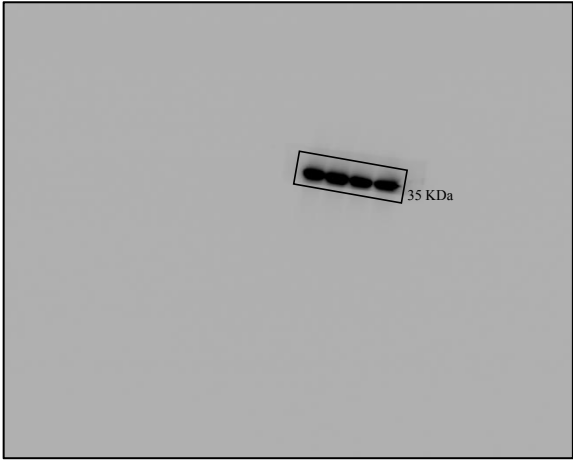

IB: Flag

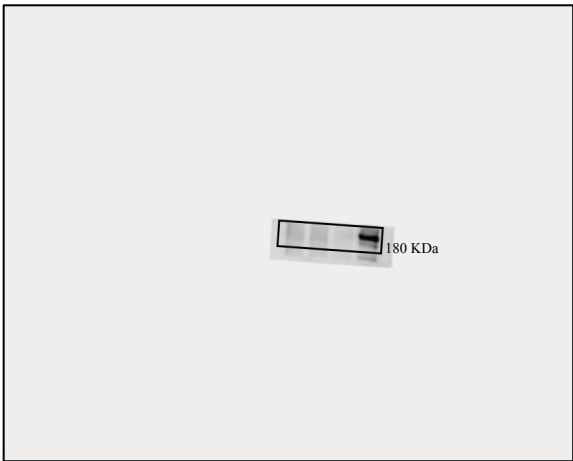

IB: Myc

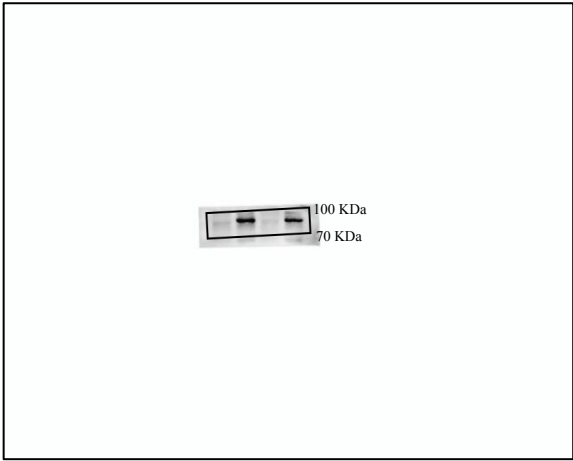

Input: Flag

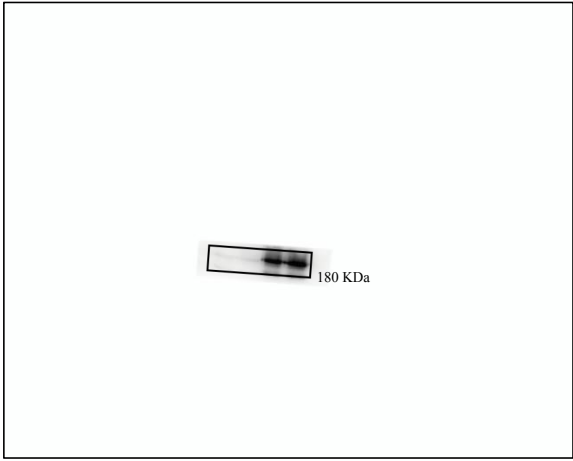

Input: Myc

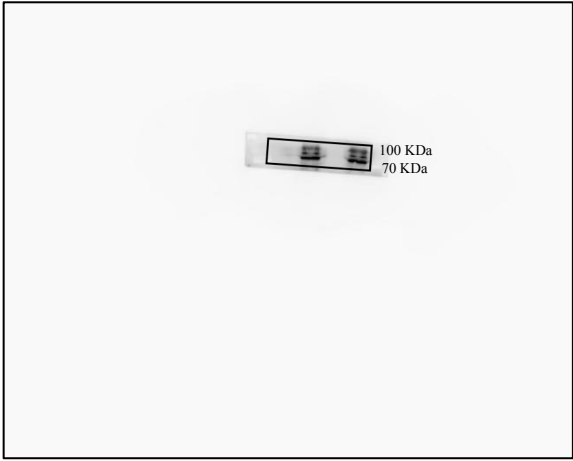

Input: GAPDH

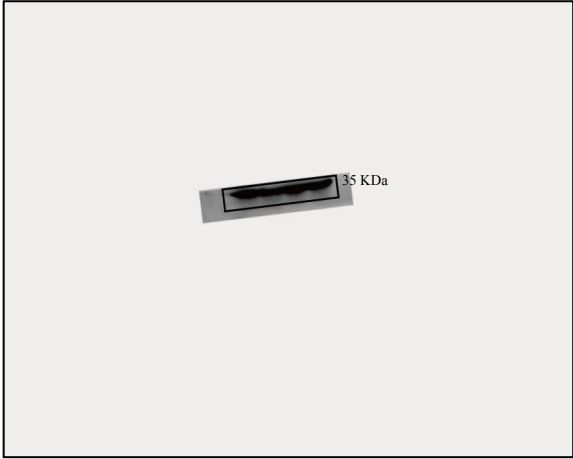

**Figure 8E**

ATR

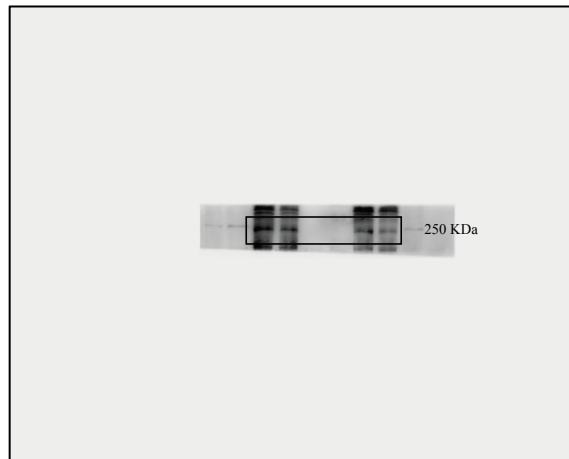

TRIM56

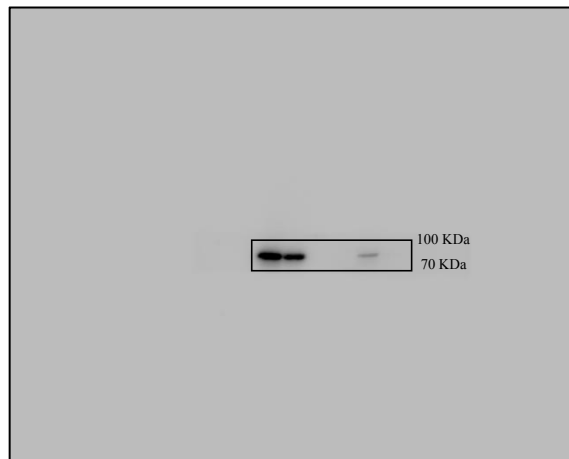

GAPDH

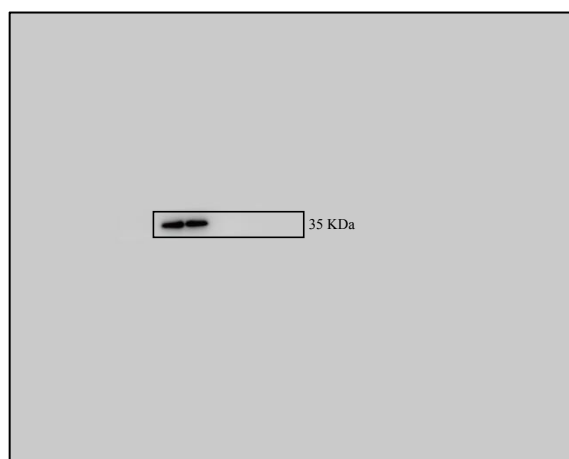

IB: ATR



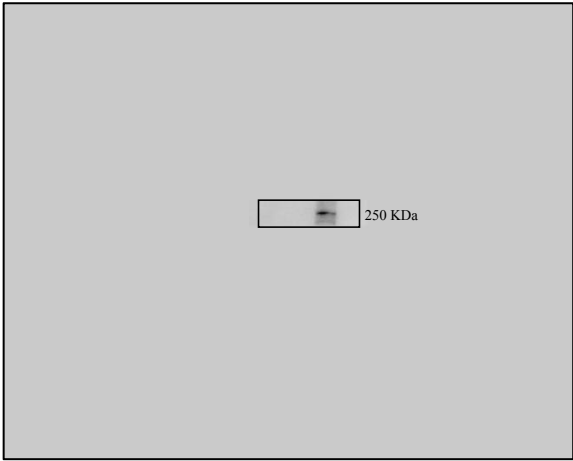

IB: TRIM56

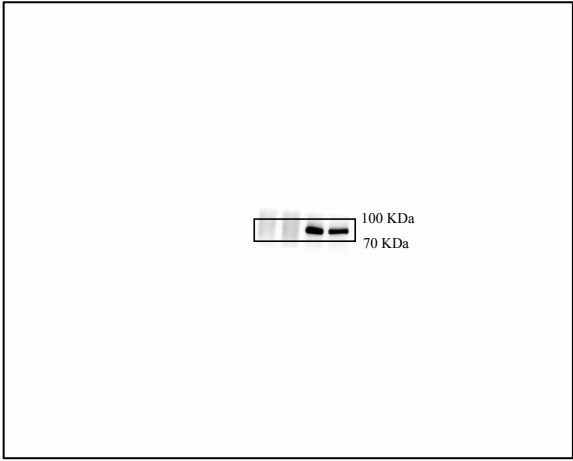

Input: ATR

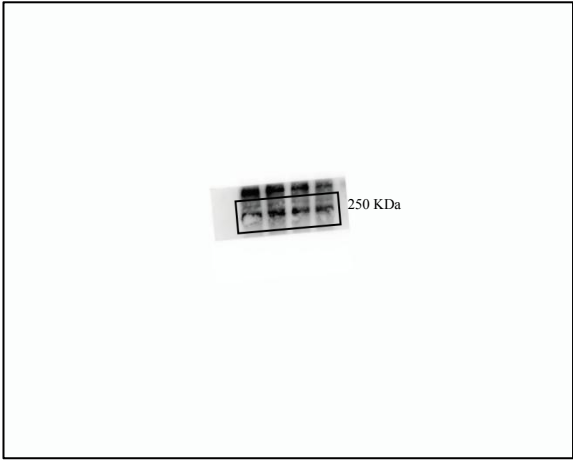

Input: TRIM56

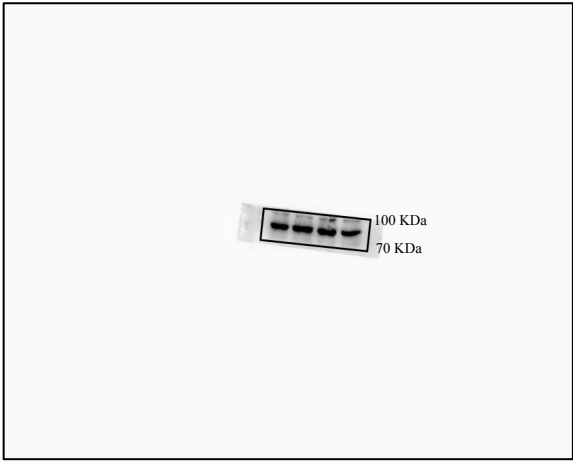

Input: GAPDH

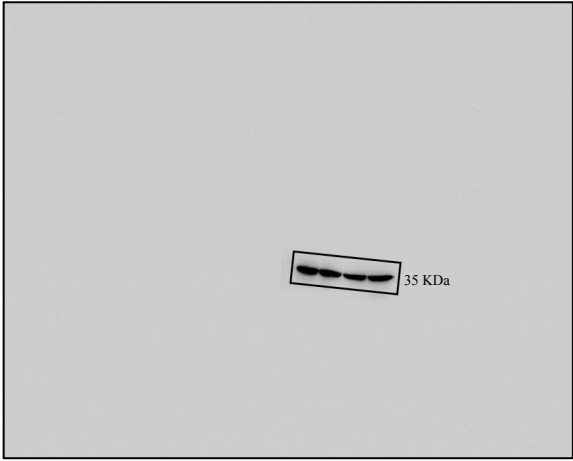

**Figure 8I**

Input: Flag

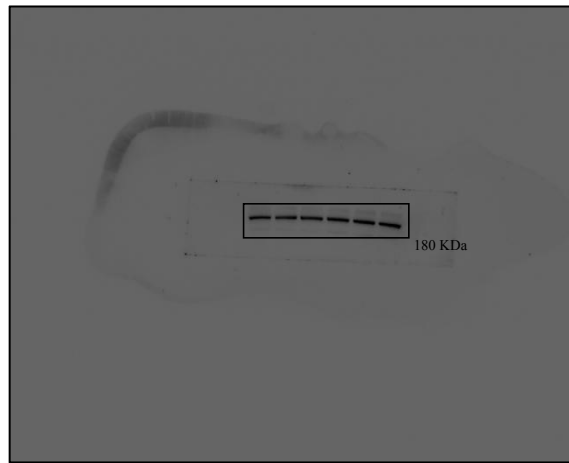

Input: TRIM56

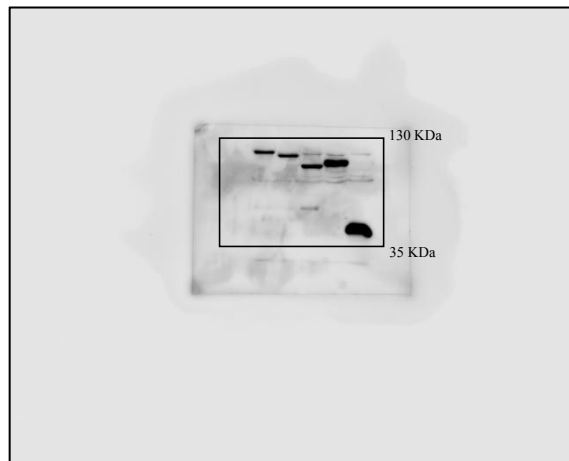

Input: GAPDH

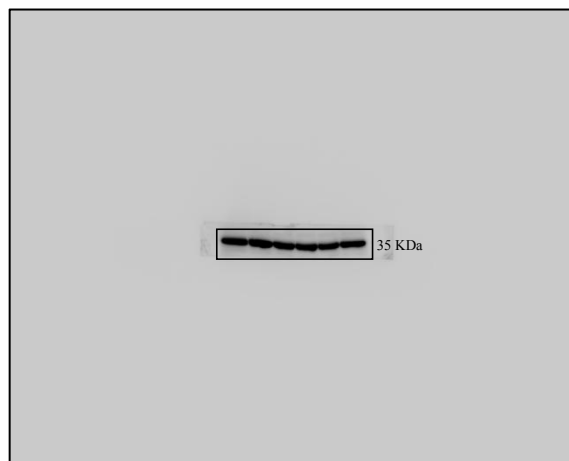

IB: Flag

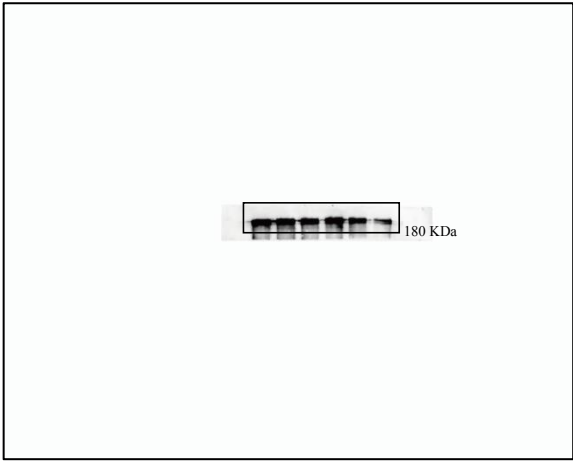

IB: TRIM56

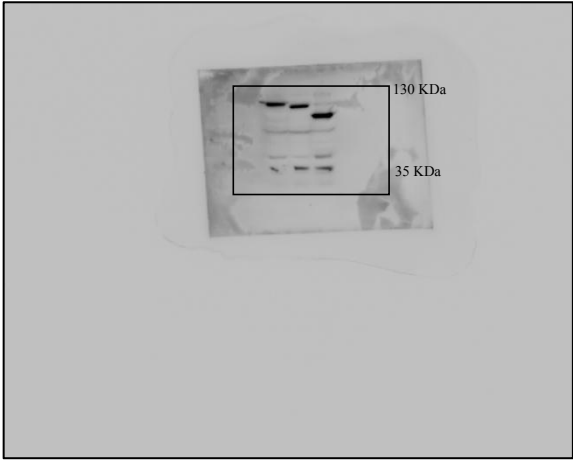

**Figure 8J**

Input: Myc

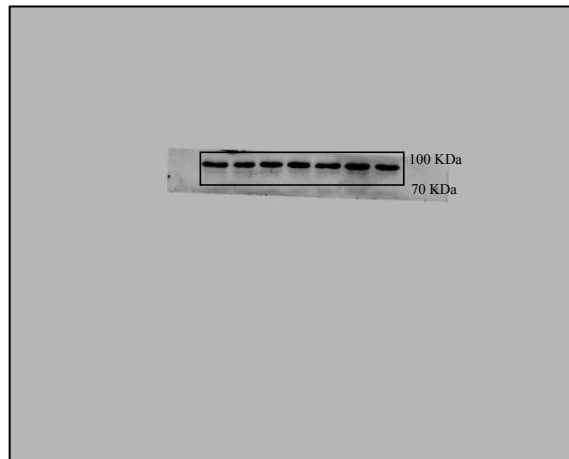

Input: Flag

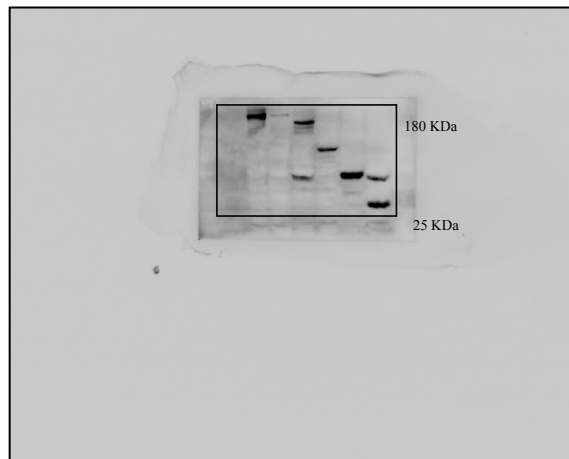

Input: GAPDH

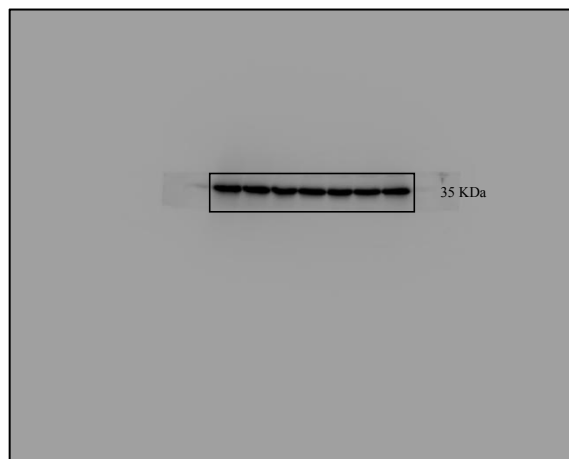

IB: Myc

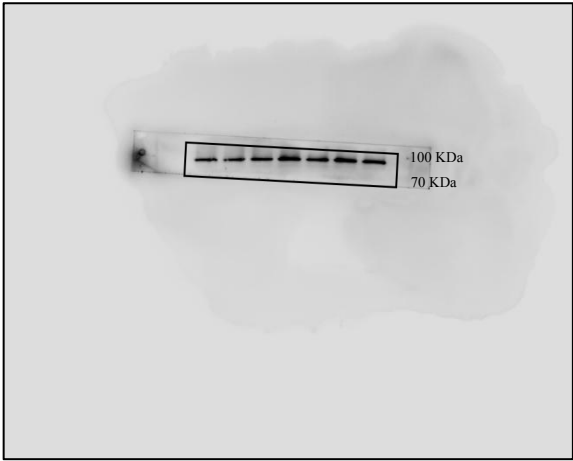

IB: Flag

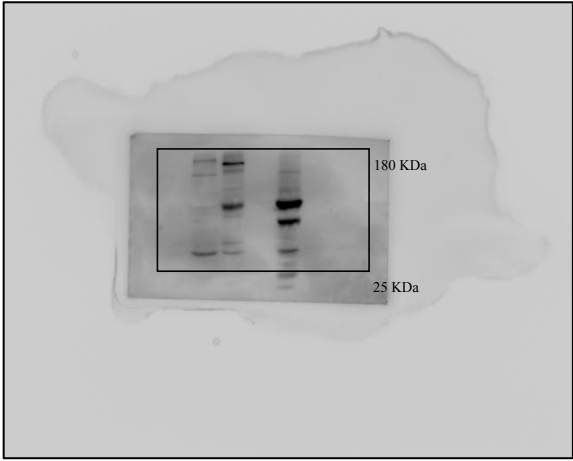

**Figure 9A**

IB: HA

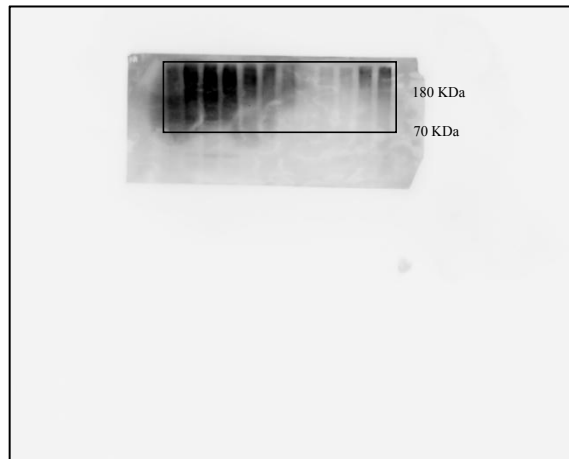

IB: Flag

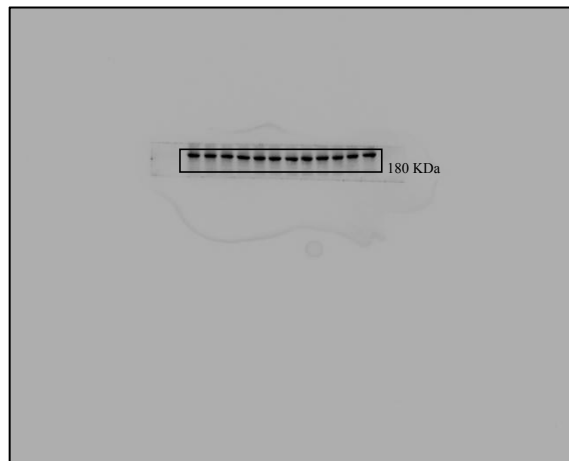

Input: Flag

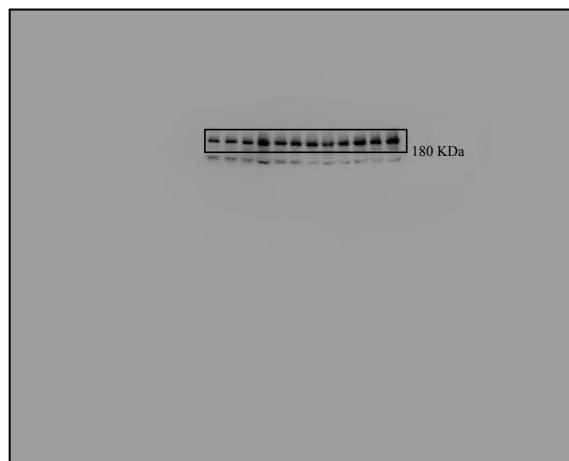

Input: Myc

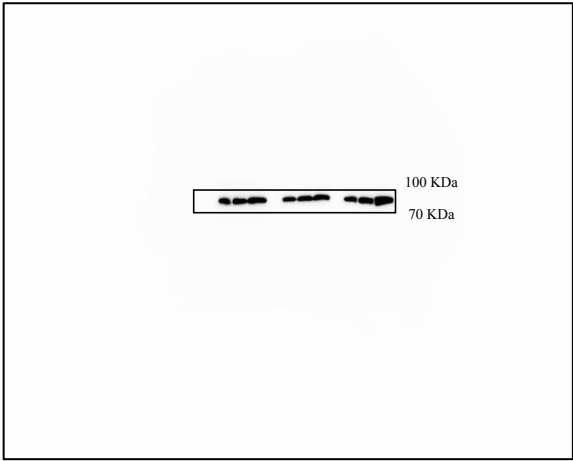

Input: HA

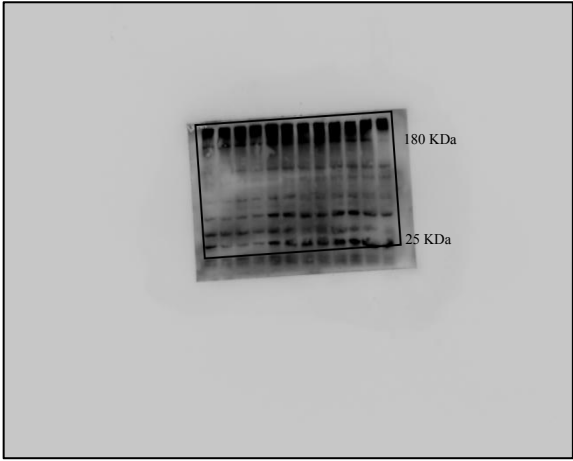

GAPDH

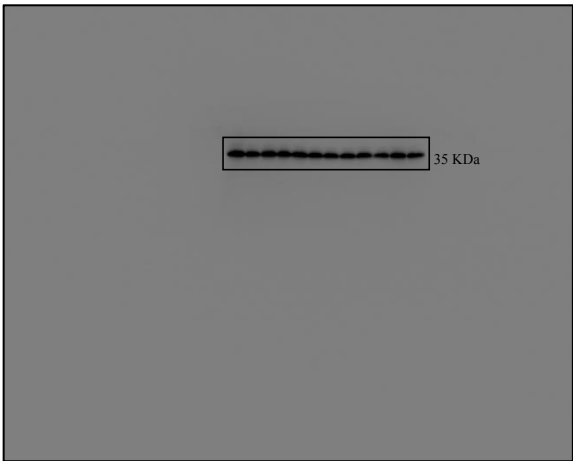



**Figure 9B**

IB: Flag

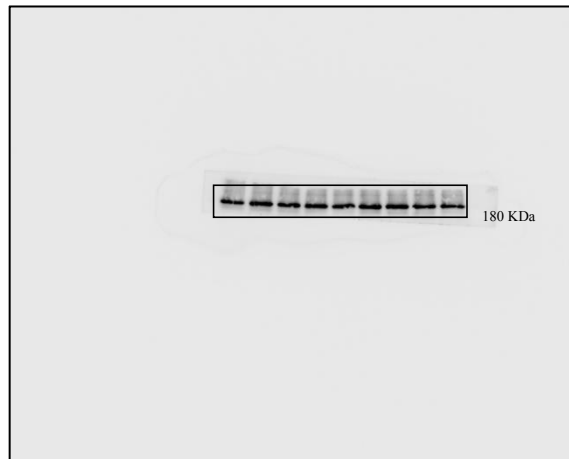

IB: HA

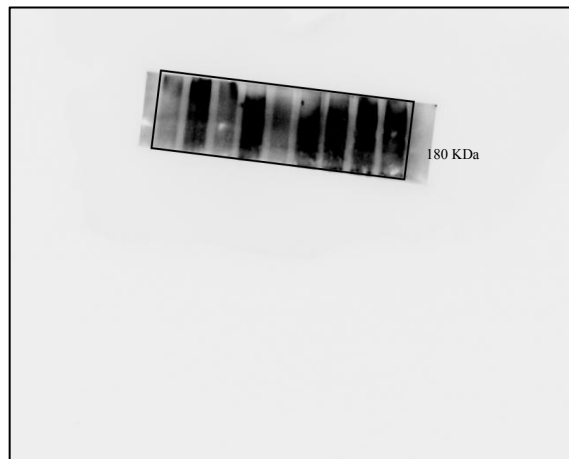

IB: Myc

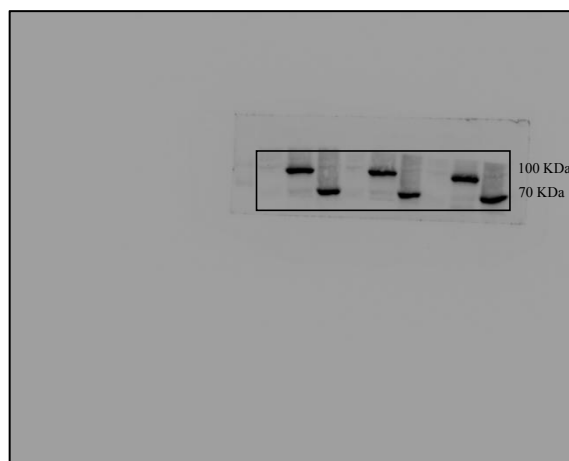

Input: Flag

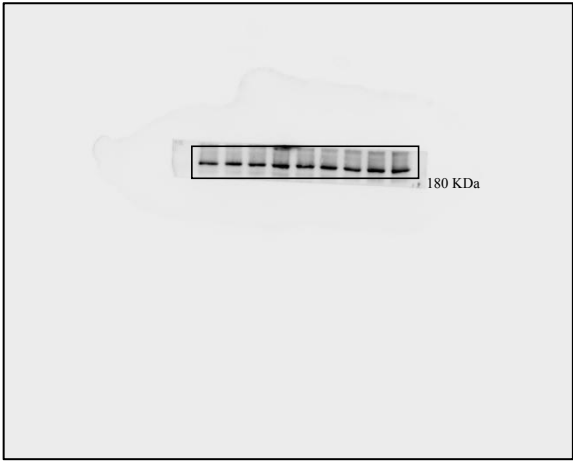

Input: Myc

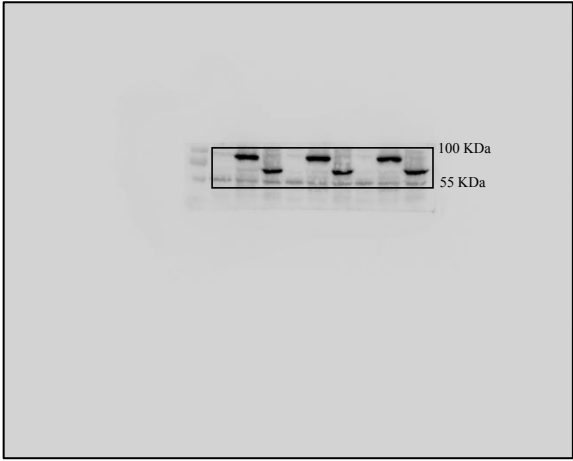

Input: HA

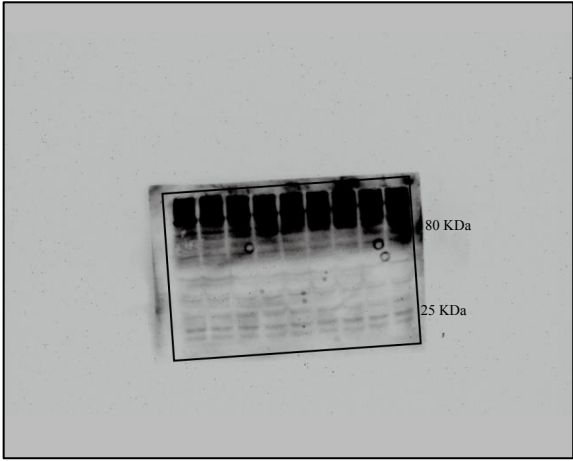

Input: GAPDH

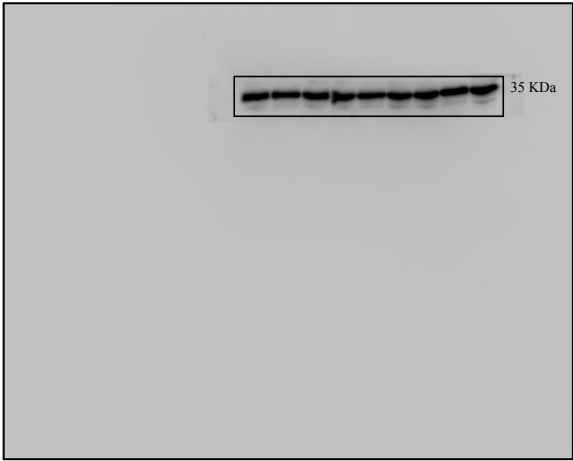

**Figure 9C**

IB: HA

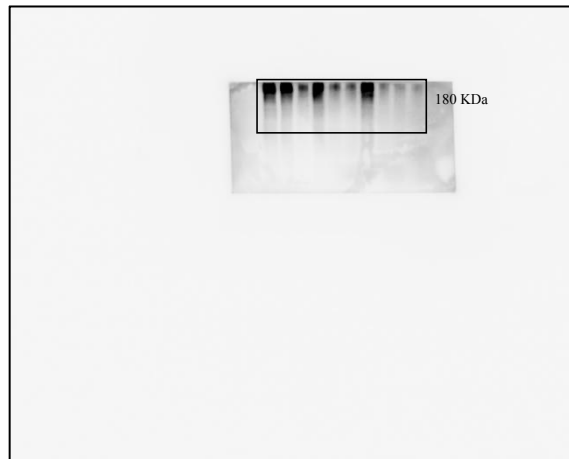

IB: Flag

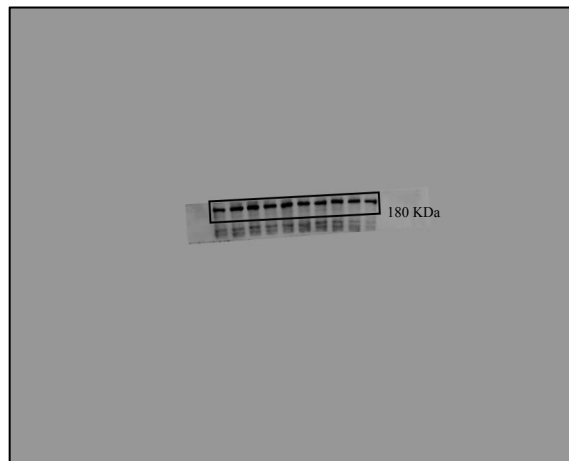

Input: Flag

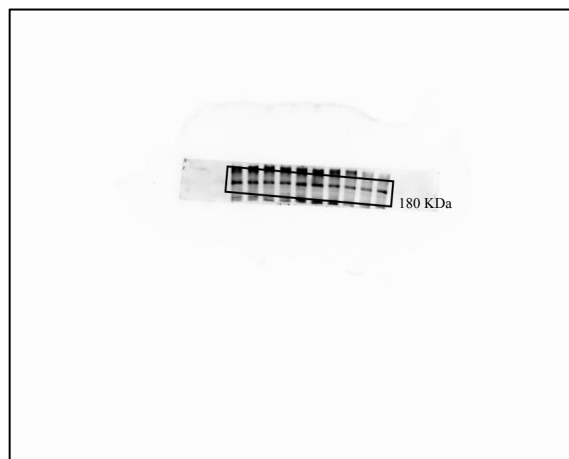

Input: Myc

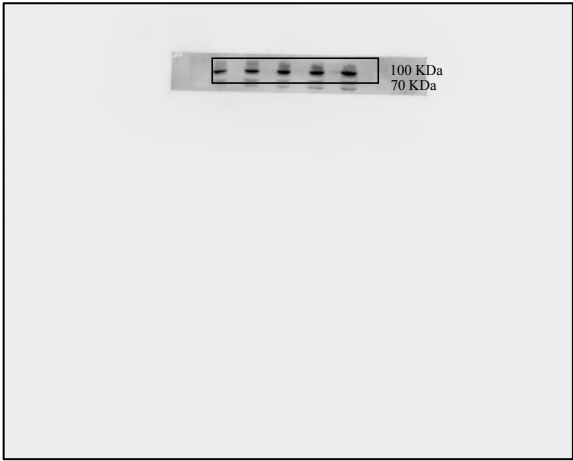

Input: GAPDH

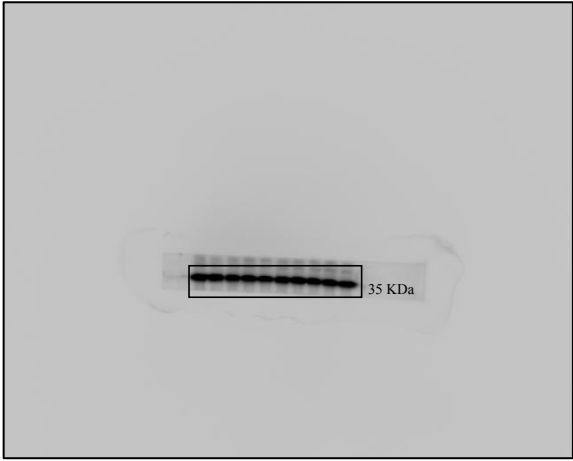

**Figure 9F**

IB: HA

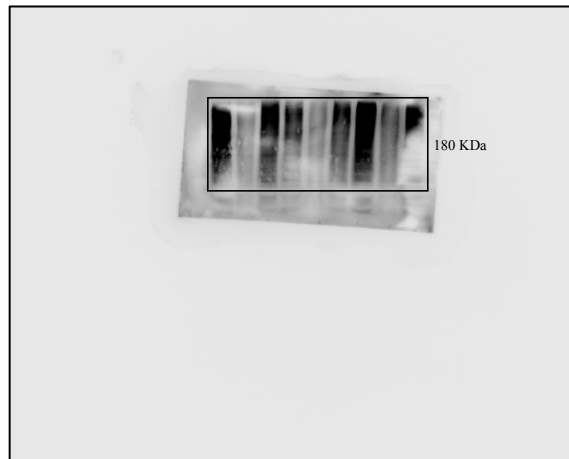

IB: Flag

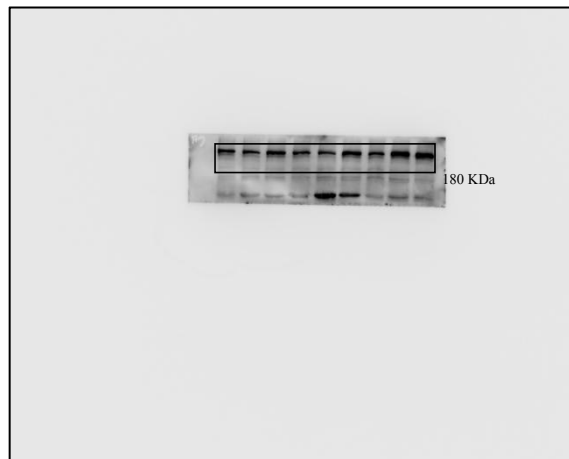

IB: Myc

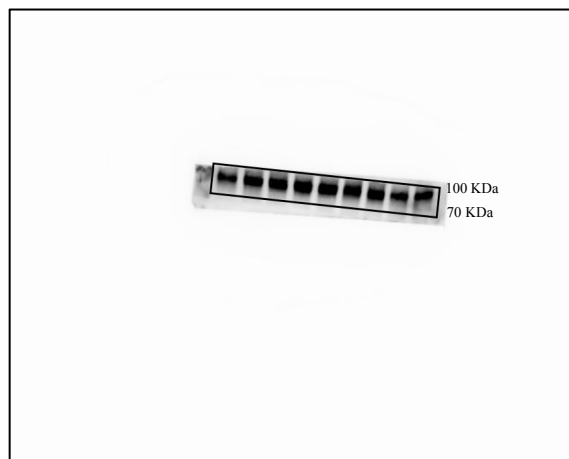

Input: Flag

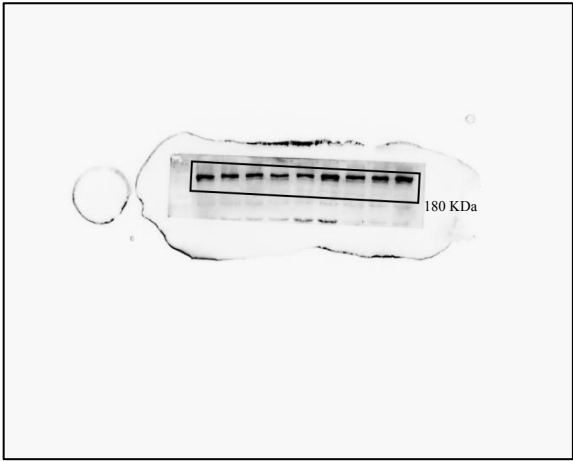

Input: HA

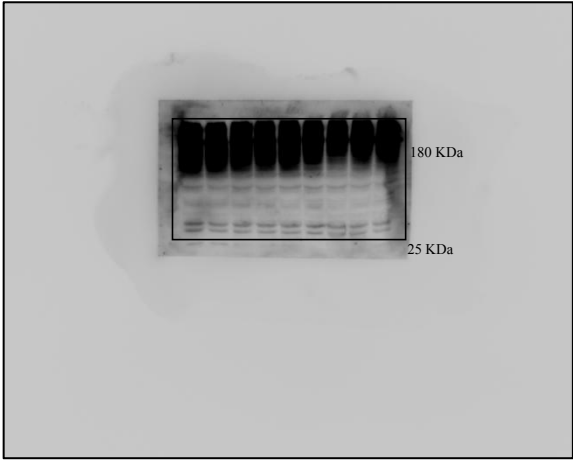

Input: Myc

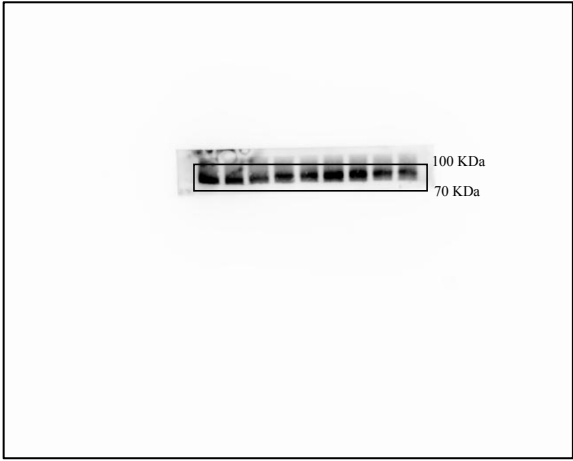

Input: GAPDH

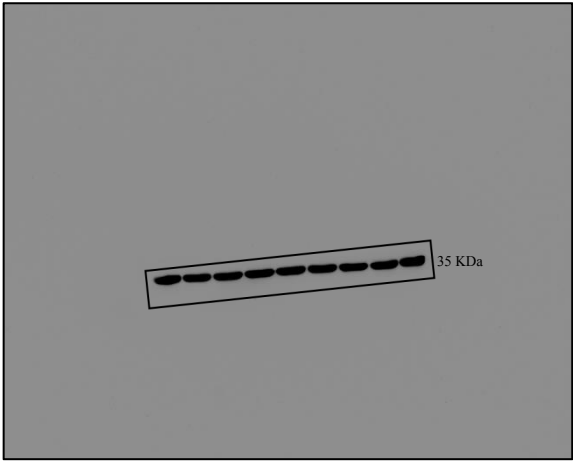



**Figure 9G**

IB: HA

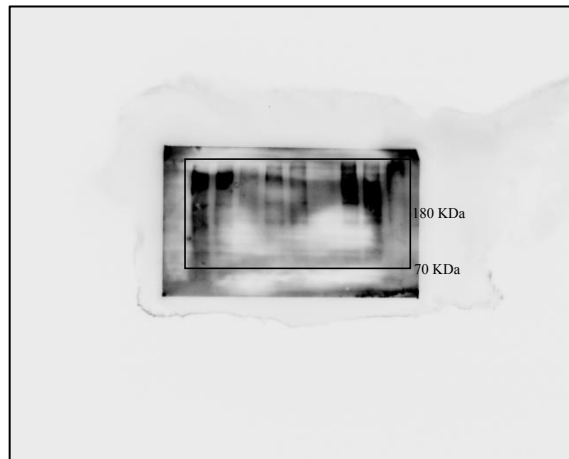

IB: Flag

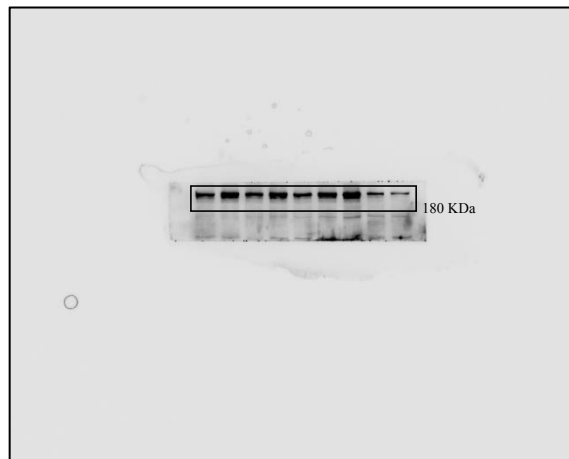

IB: TRIM56

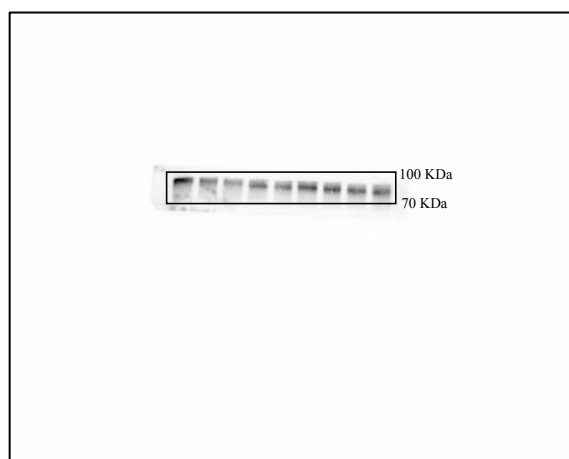

Input: Flag

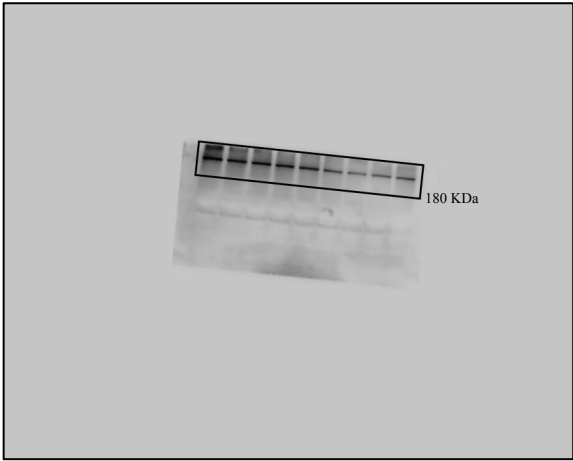

Input: HA

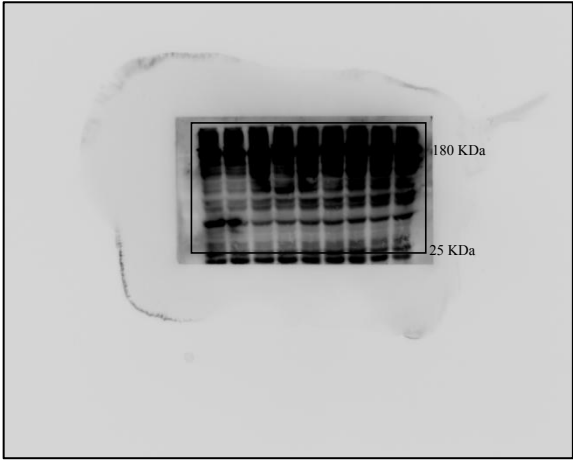

Input: Myc

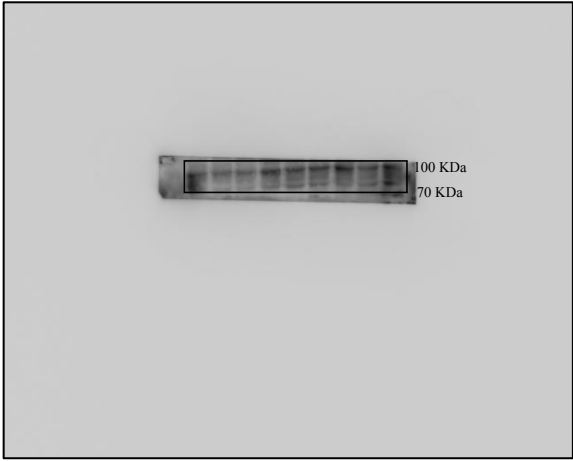

Input: GAPDH

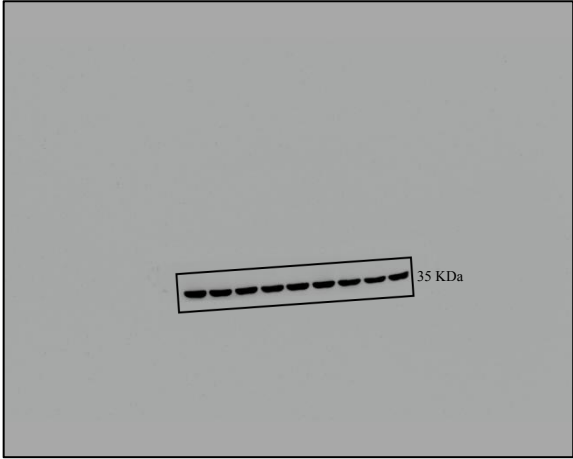

**Figure 10A**

p-p53

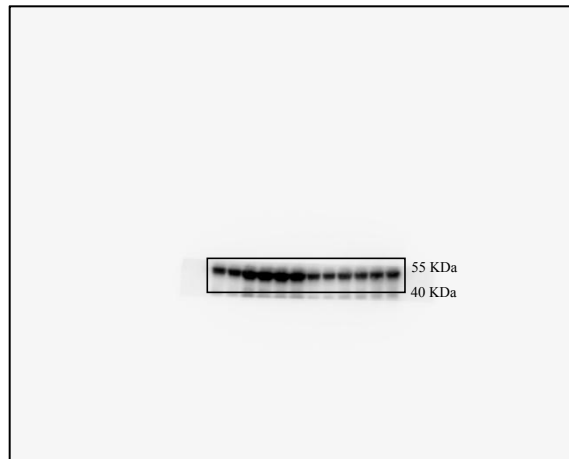

p21

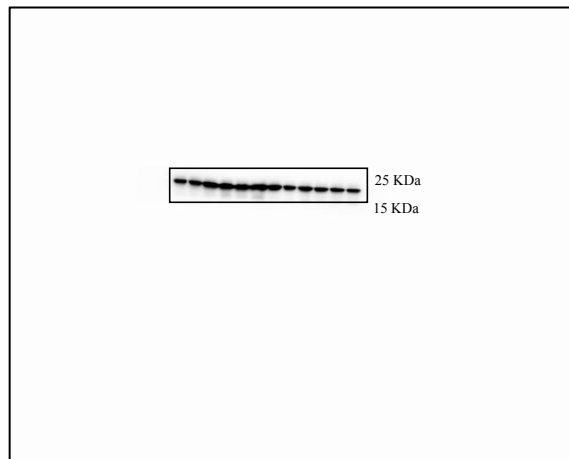

p16

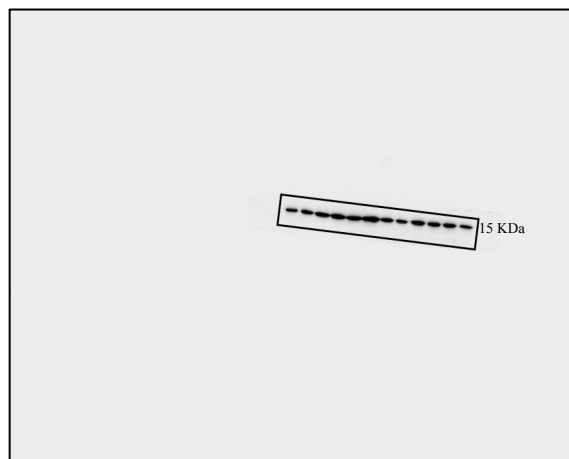

GAPDH

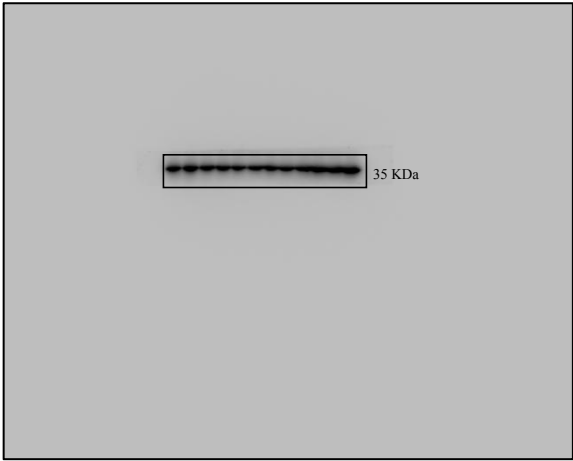

**Figure 10D**

cGAS

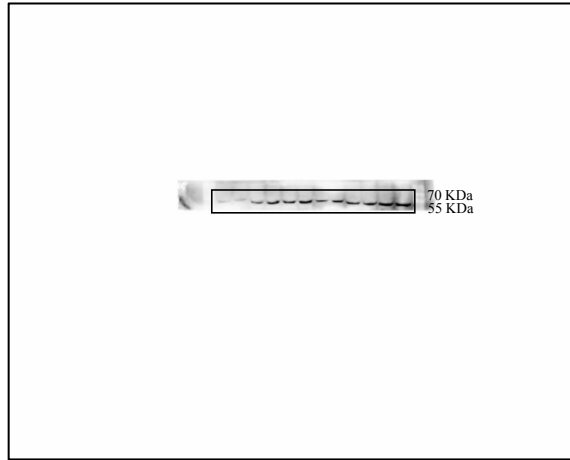

p-STING

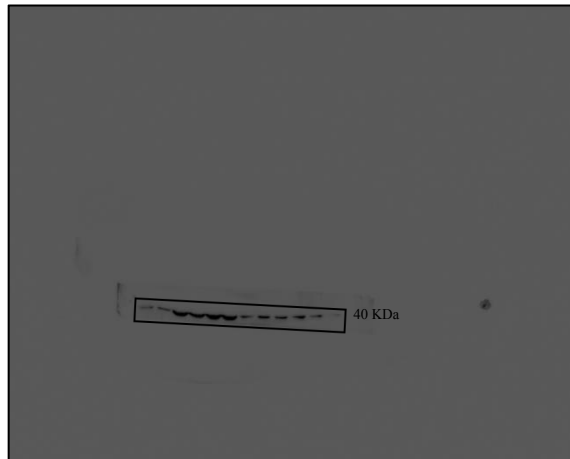

STING

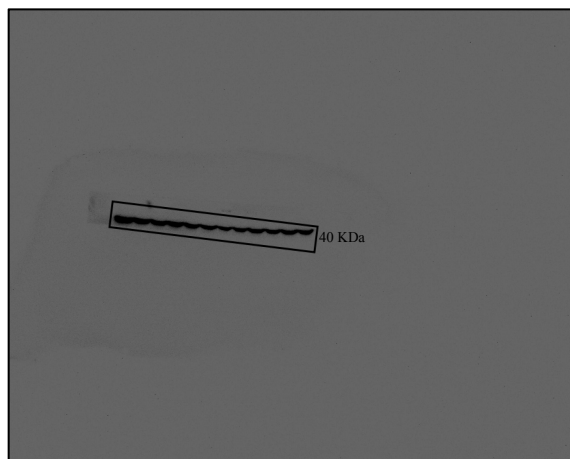

GAPDH

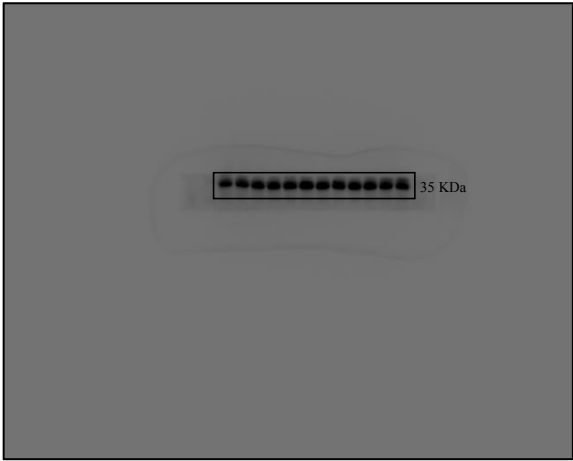

$\gamma$ H2A

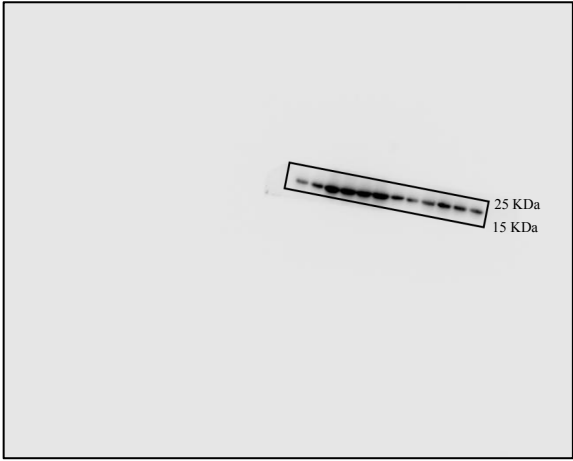

GAPDH

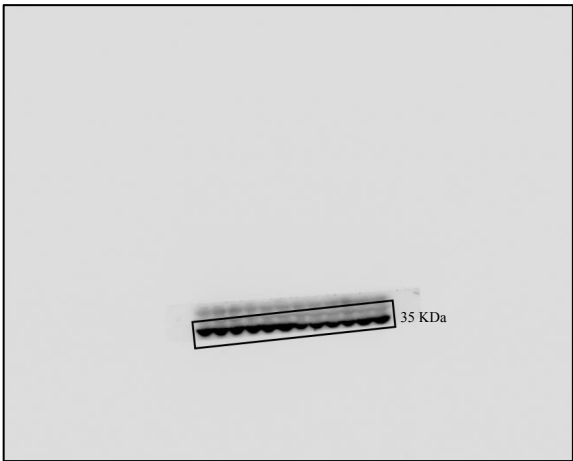

**Figure 10F**

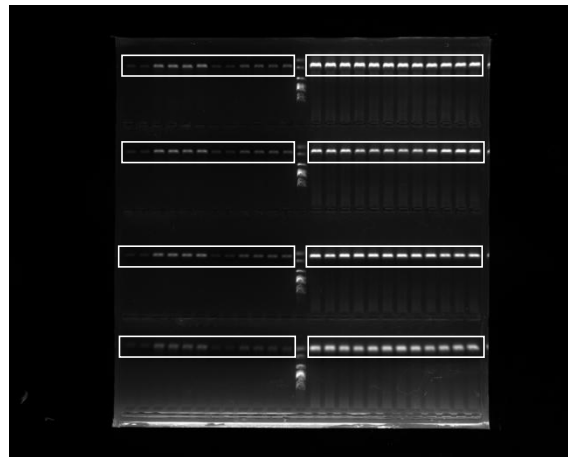



**Figure 10G**

gDNA

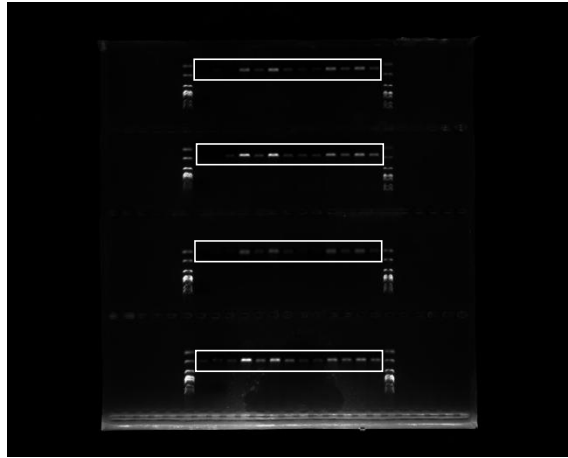

IB: cGAS

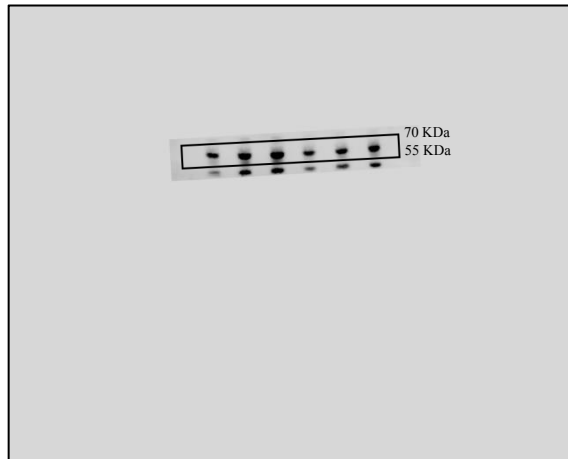

IB: AIM2

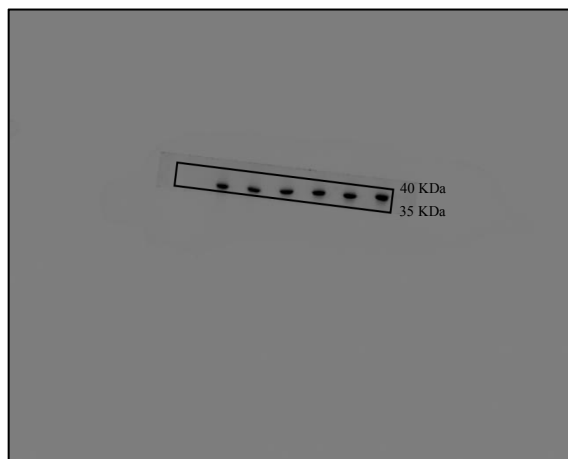

Input: gDNA

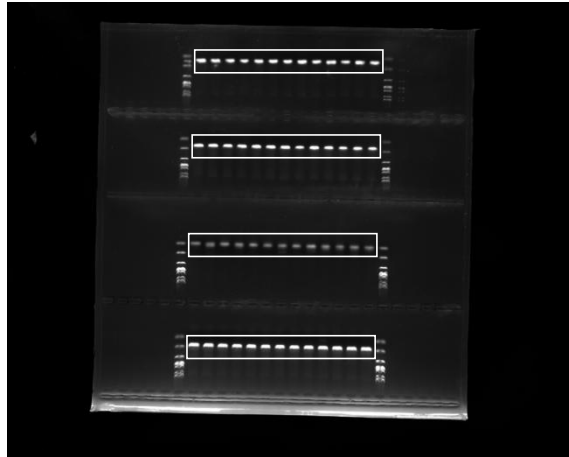

Input: cGAS

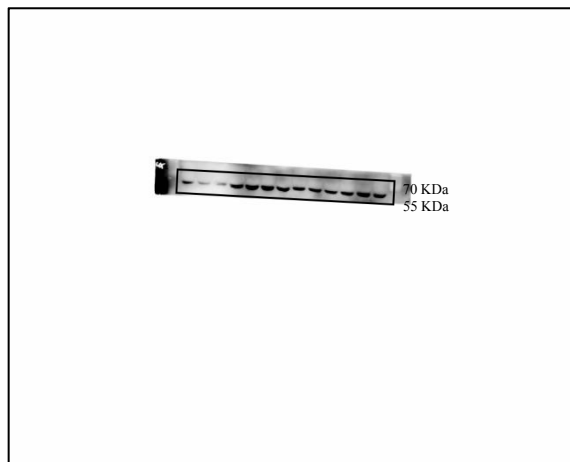

Input: AIM2

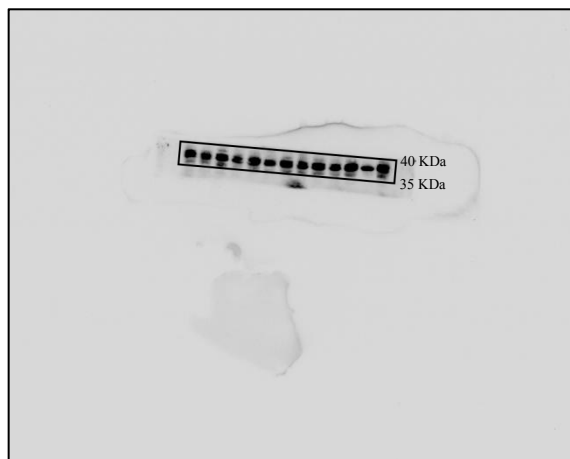

Input: GAPDH

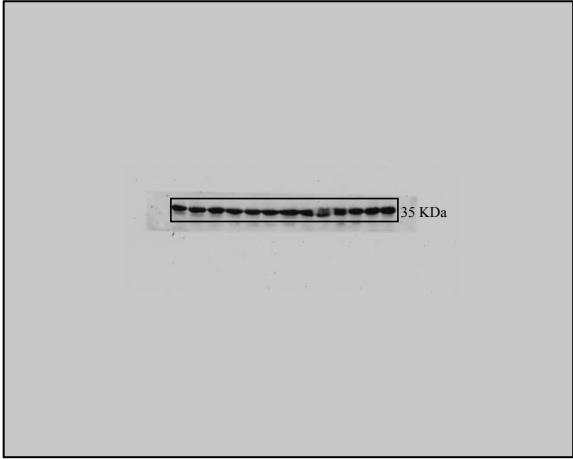

**Figure 12A**

USP10

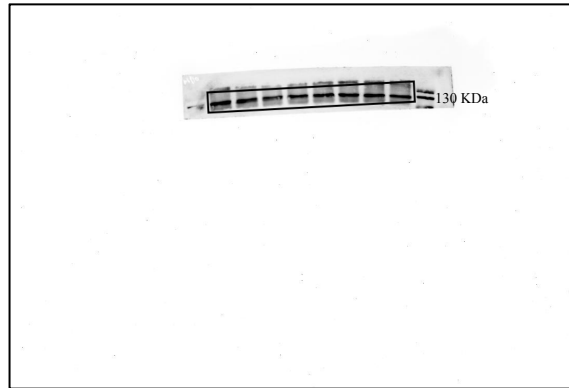

USP5

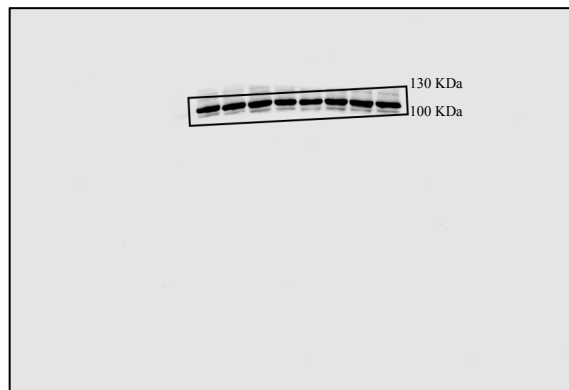

TIRM56

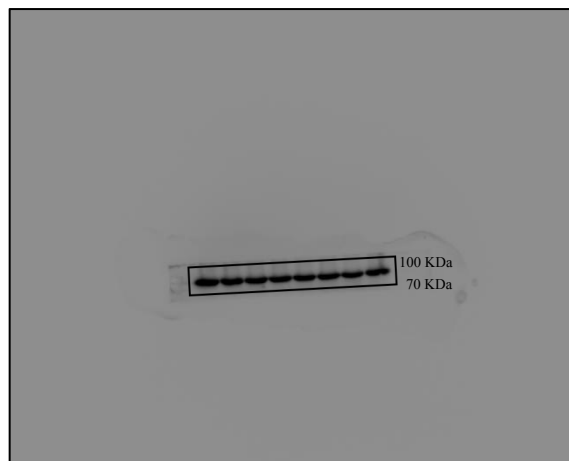

TRIM25

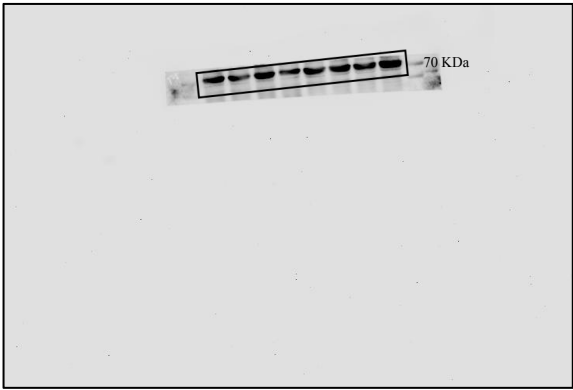

MKRN1

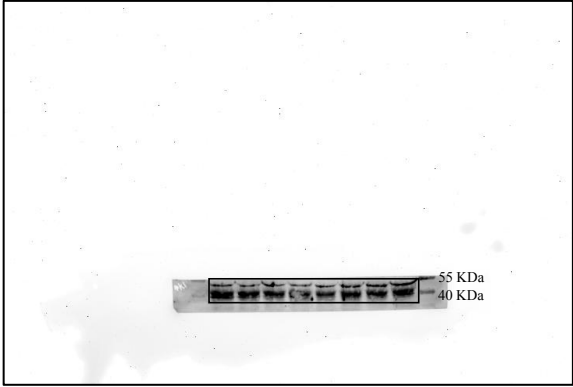

GAPDH

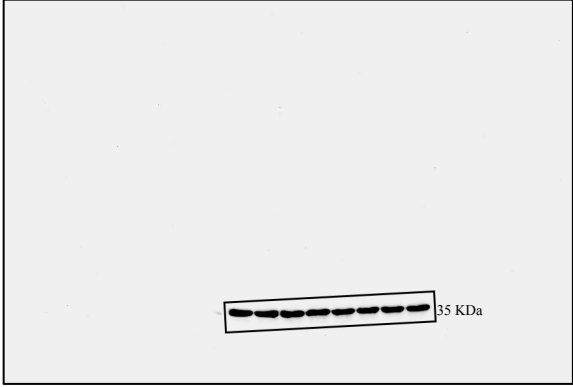

**Figure 12F**

USP10

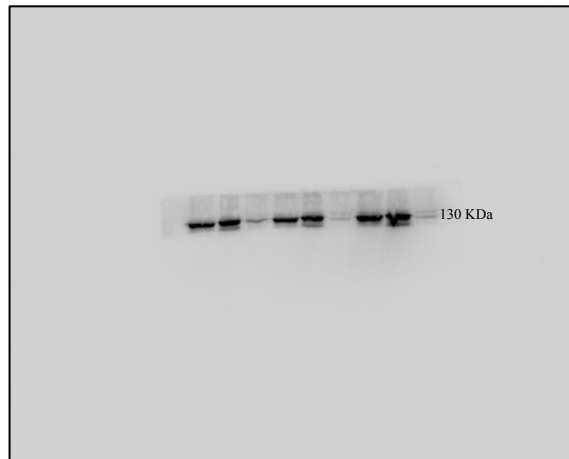

USP5

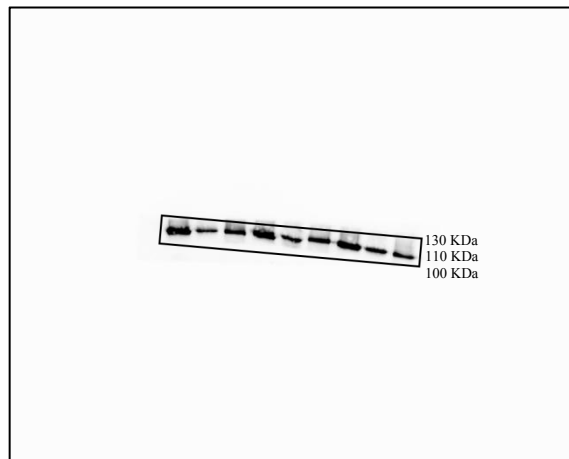

TRIM56

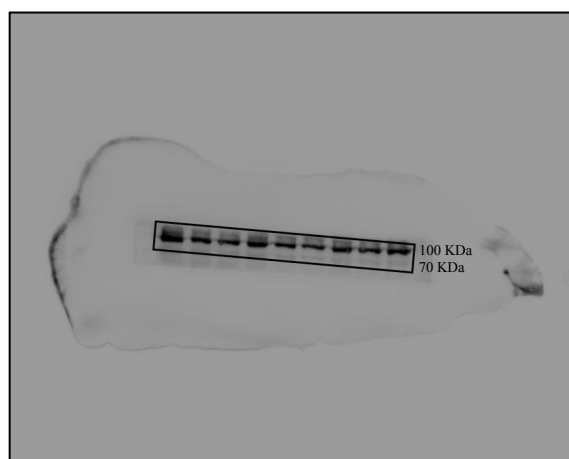

TRIM25

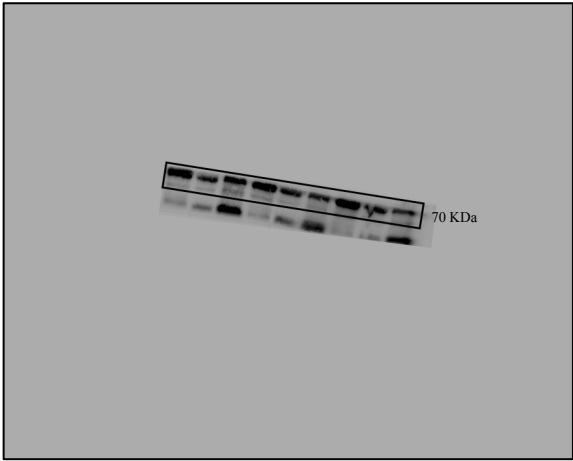

MKRN1

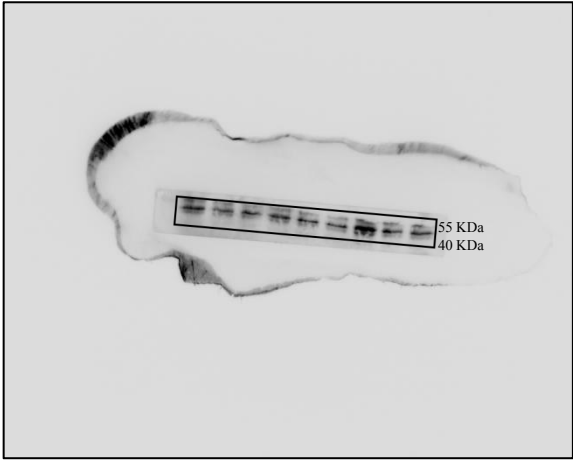

Tubulin

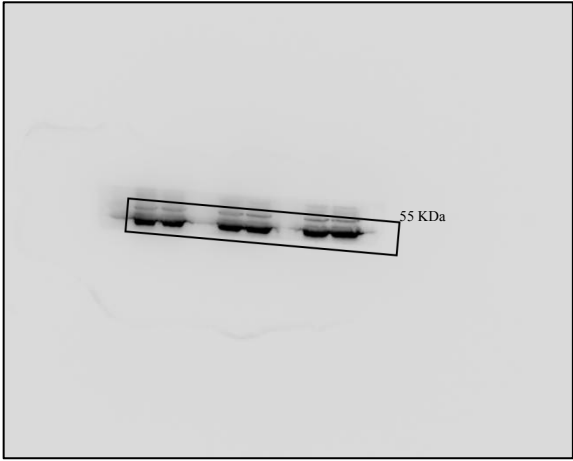

PCNA

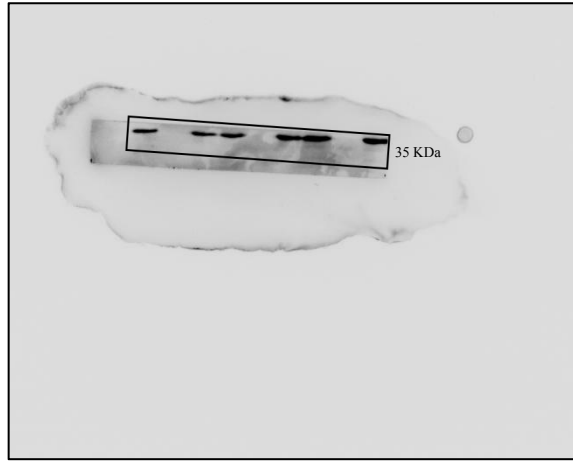

USP10

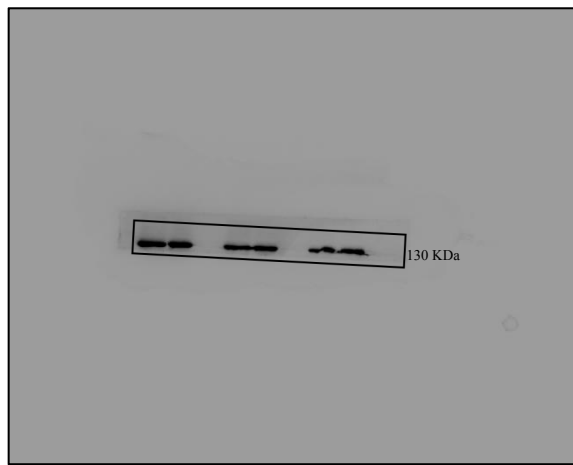

USP5

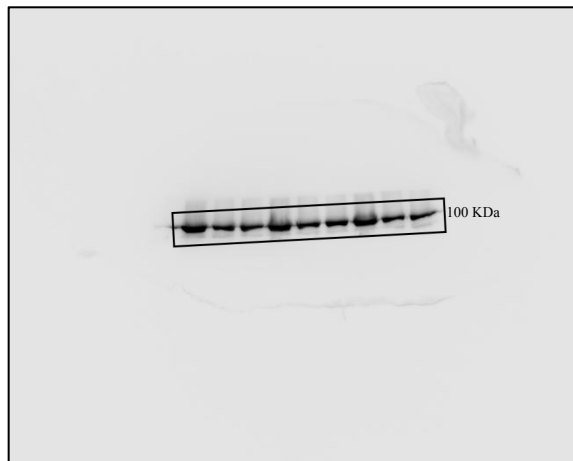

TRIM56



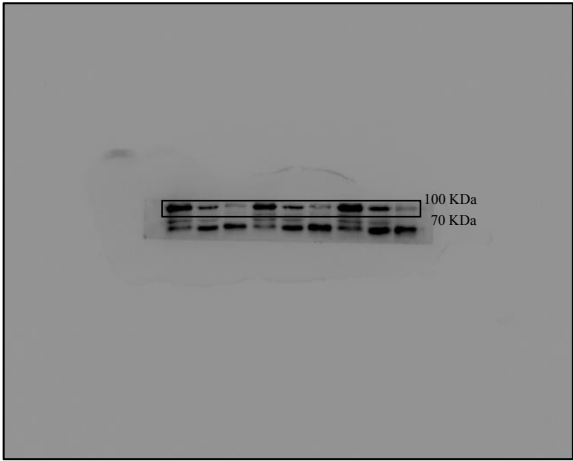

TRIM25

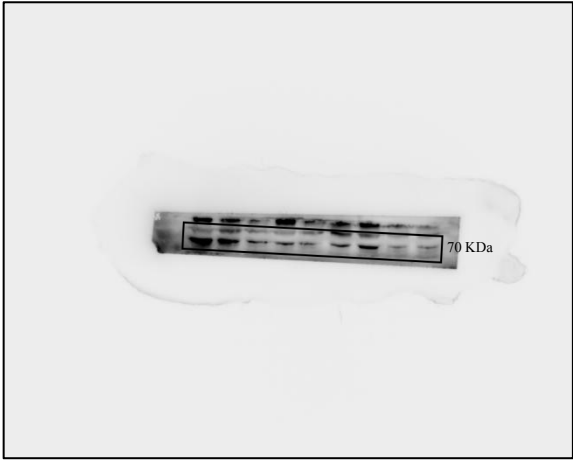

MKRN1

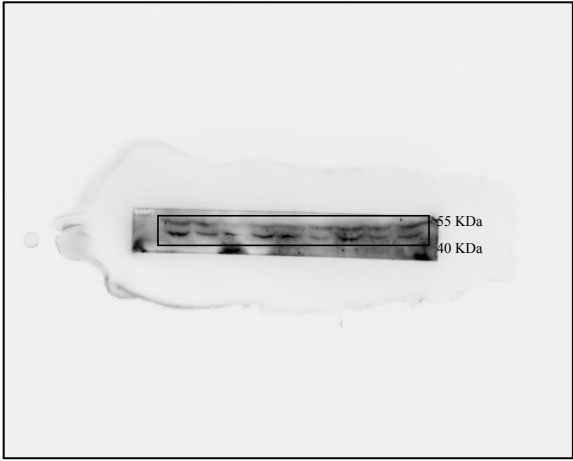

Tubulin

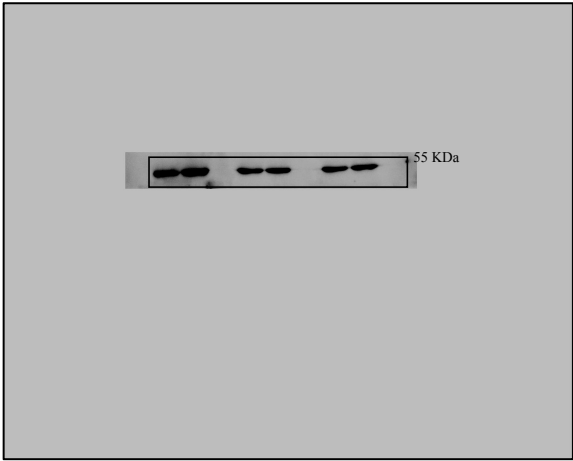

PCNA

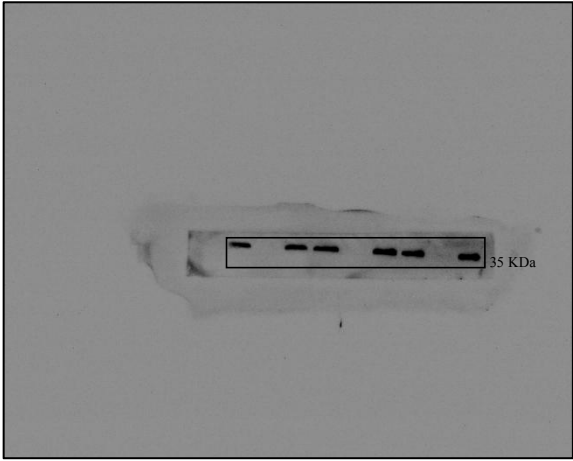

**Figure 12I**

Myc

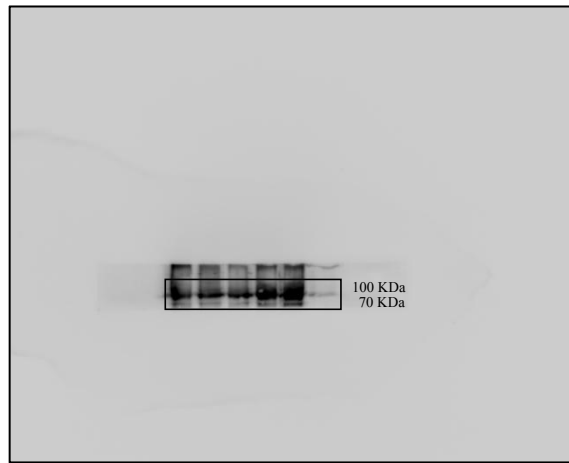

Tubulin-PCNA

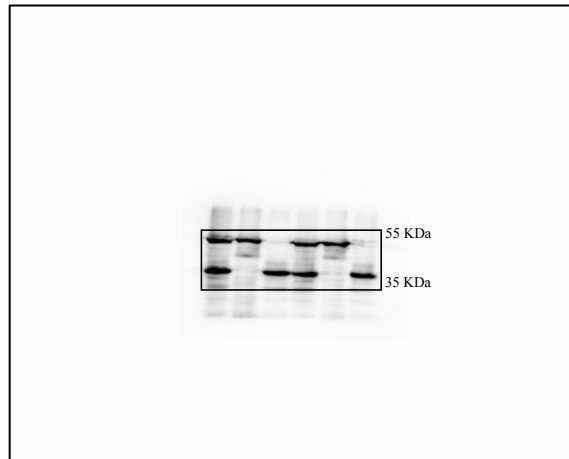

**Figure 13A**

ATR

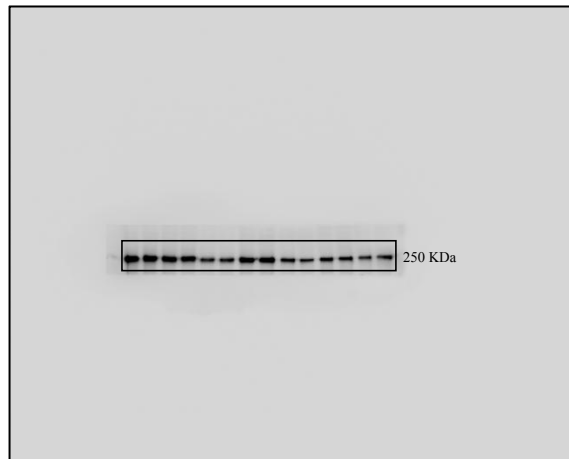

GAPDH

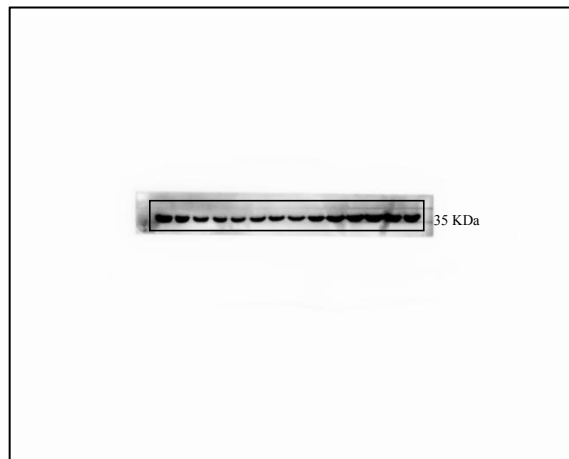

**Figure 13B**

ATR

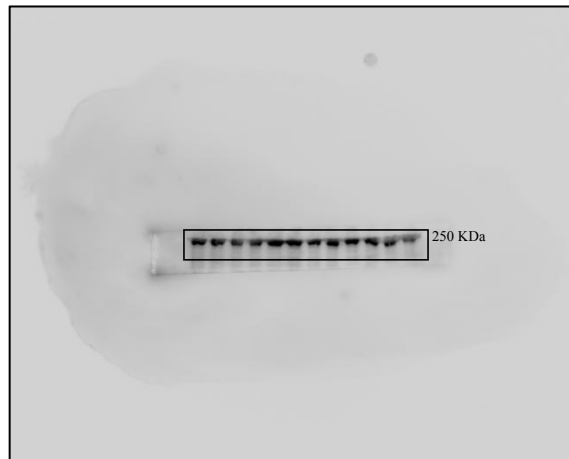

GAPDH

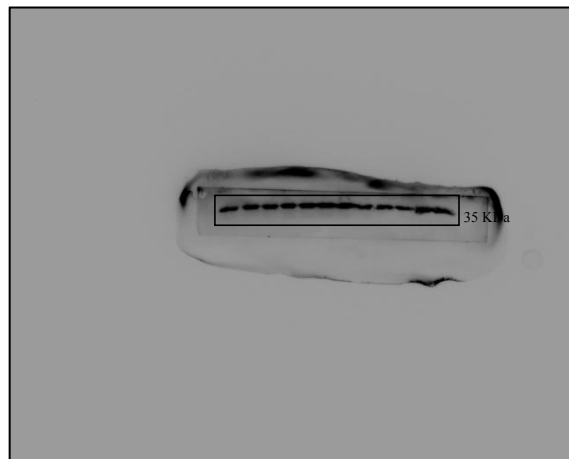

**Figure 13C**

ATR

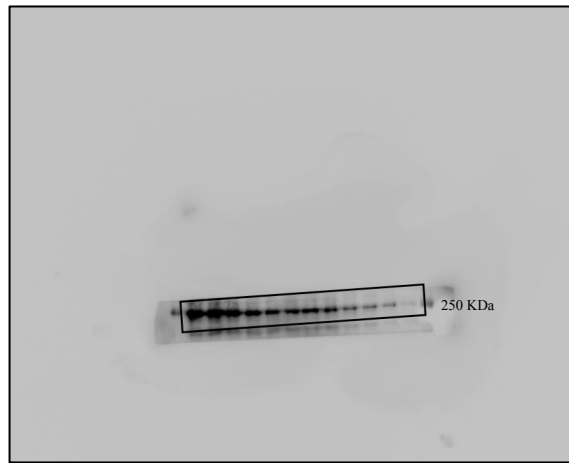

GAPDH

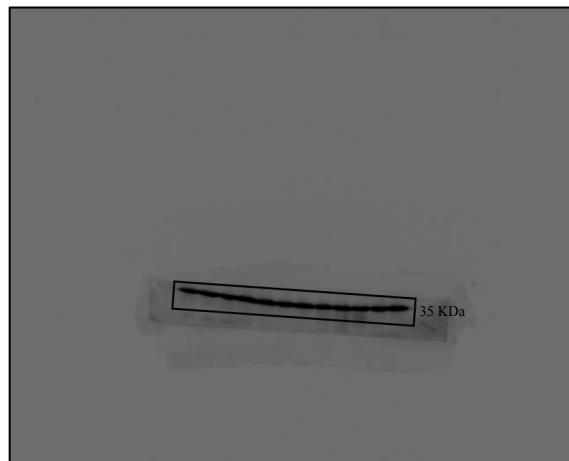

**Figure 13C**

ATR

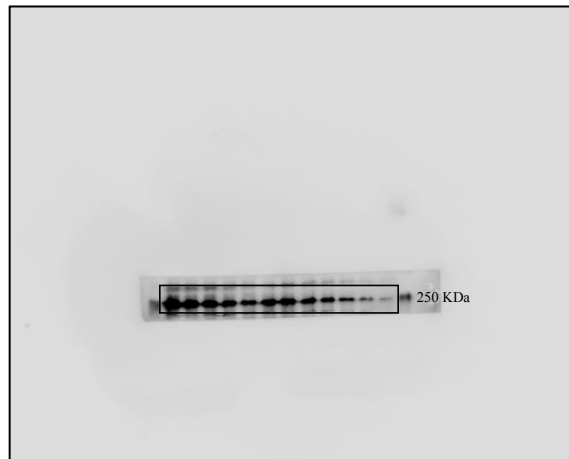

GAPDH

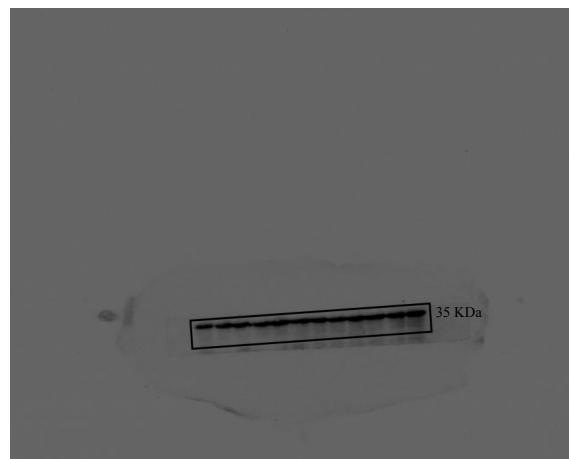

**Figure 13E**

IP: K63-Ub

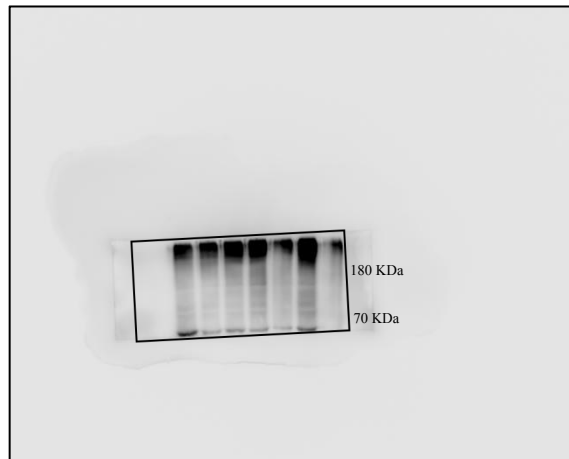

IP: K48-Ub

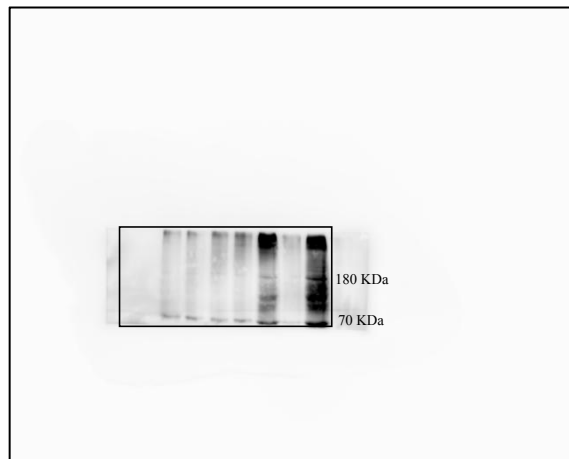

IP:ATR

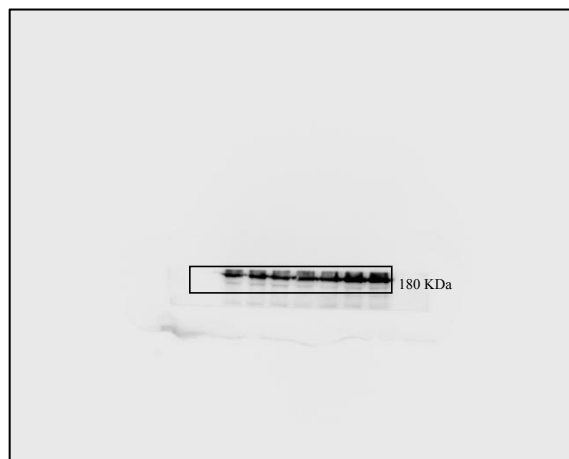

Input: ATR



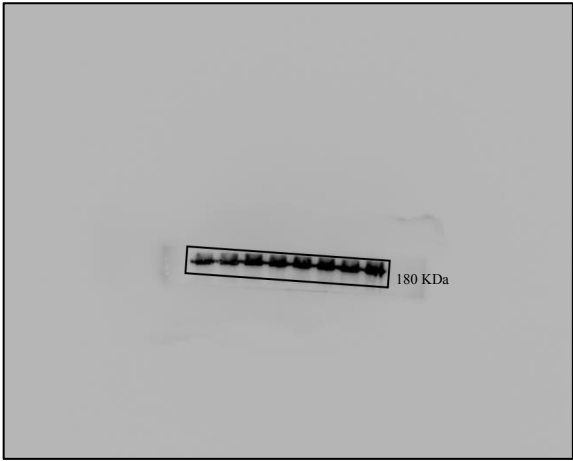

Input: GAPDH

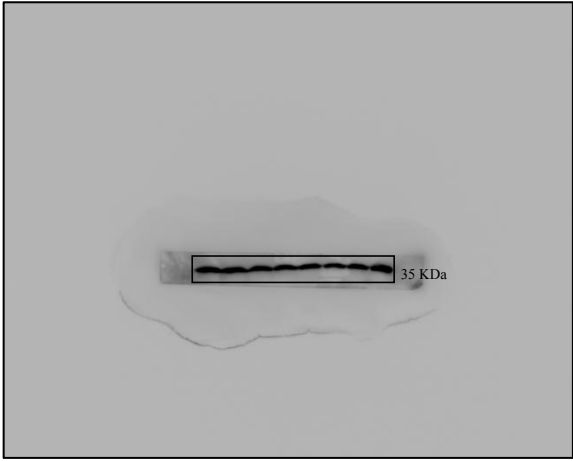

**Figure 13F**

p-p53

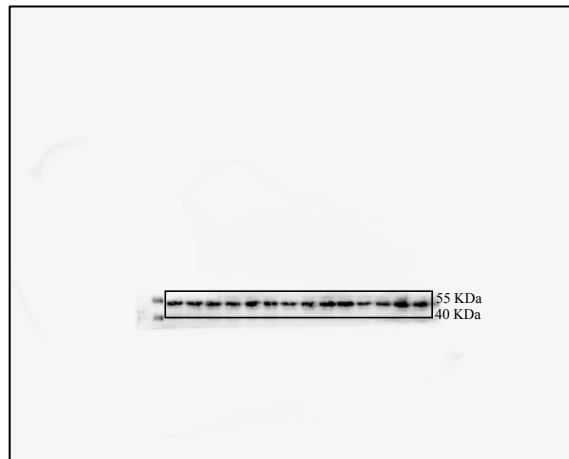

p21

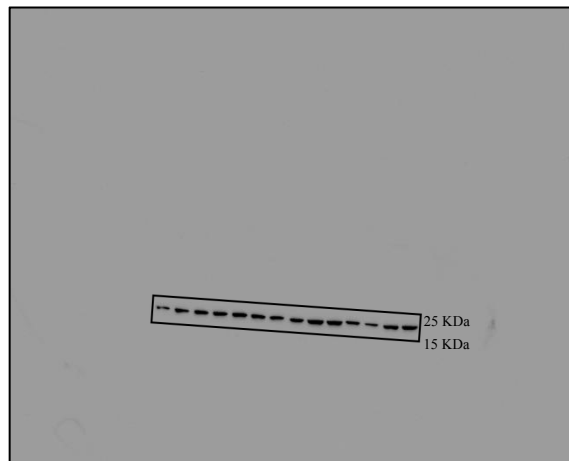

GAPDH

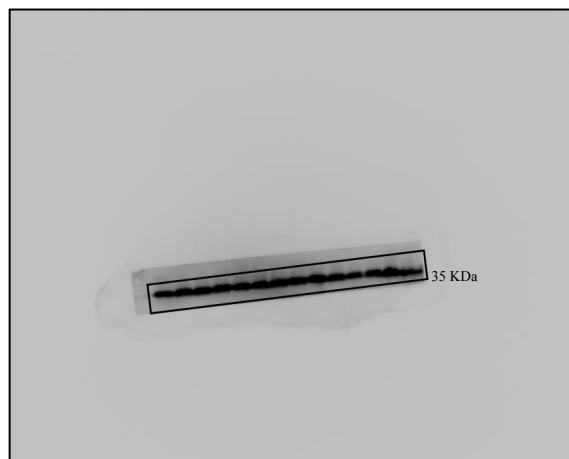

Figure 13G

cGAS

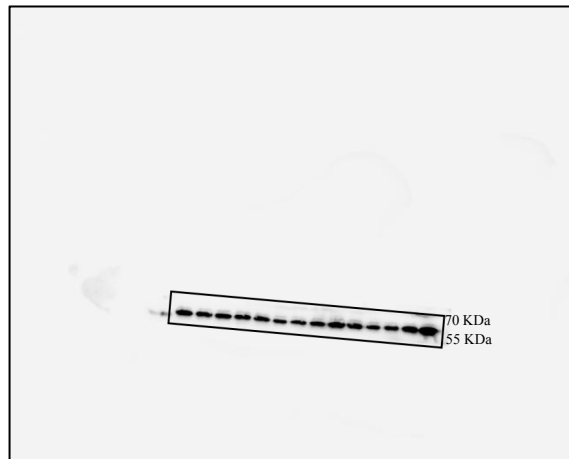

p-STING

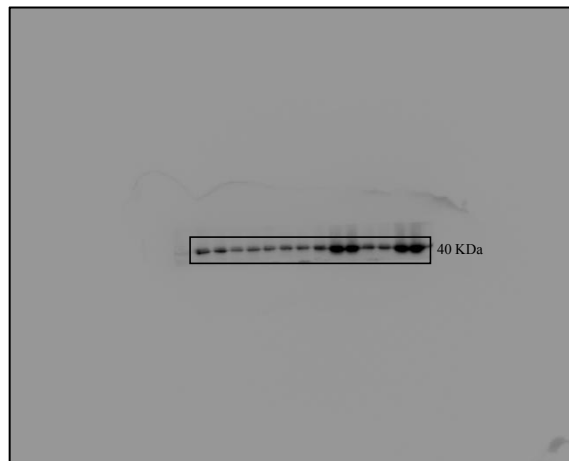

STING

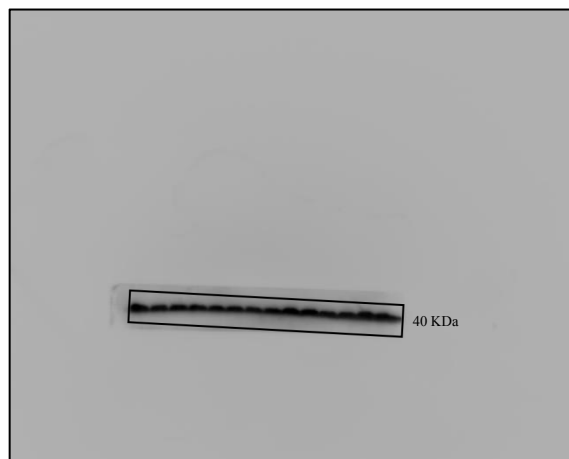

$\gamma$ H2A

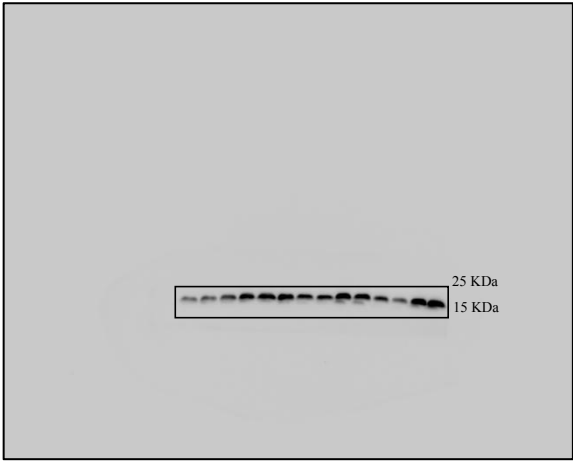

GAPDH

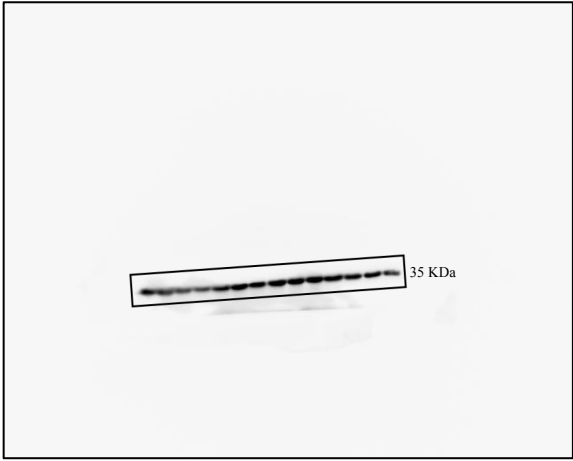

**Figure 13I**

p-p53

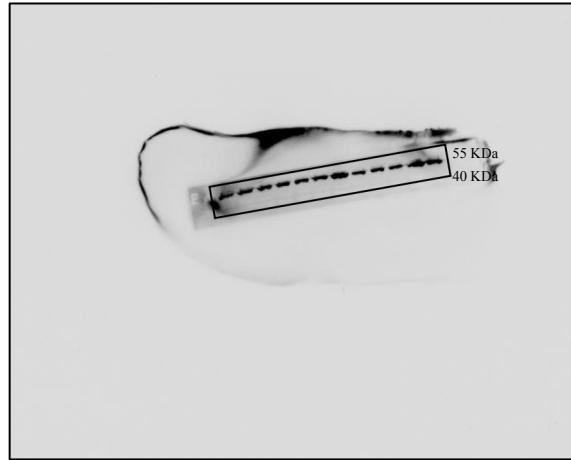

p21

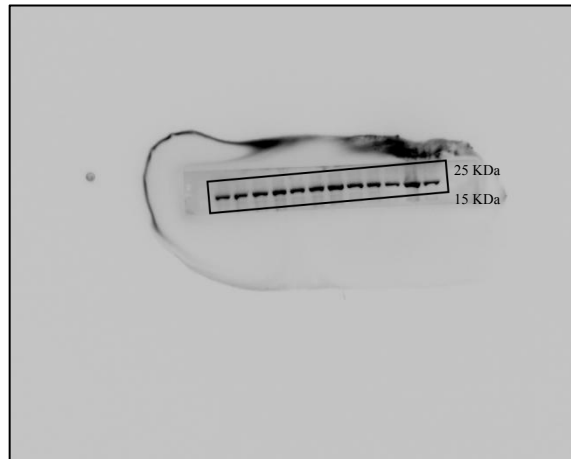

GAPDH

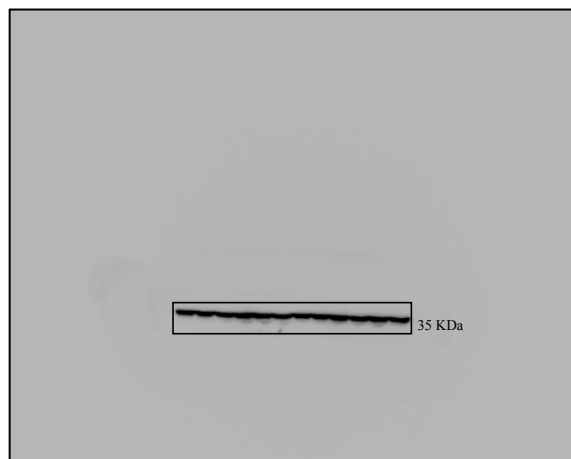

**Figure 13J**

cGAS

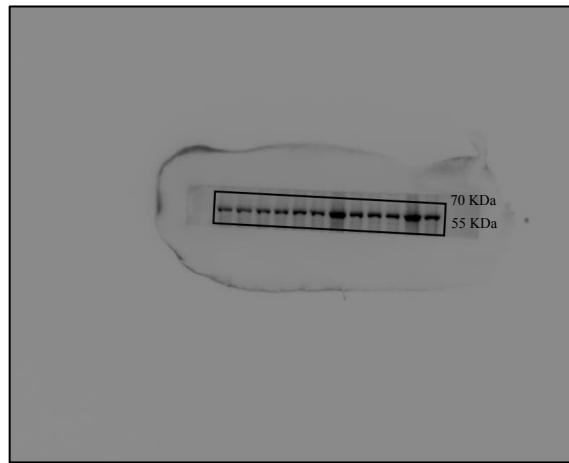

p-STING

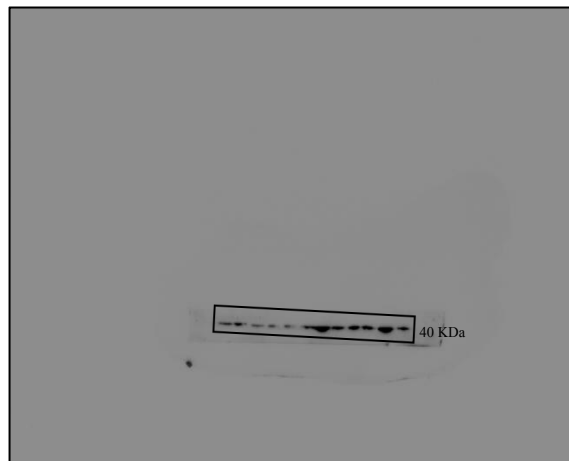

STING

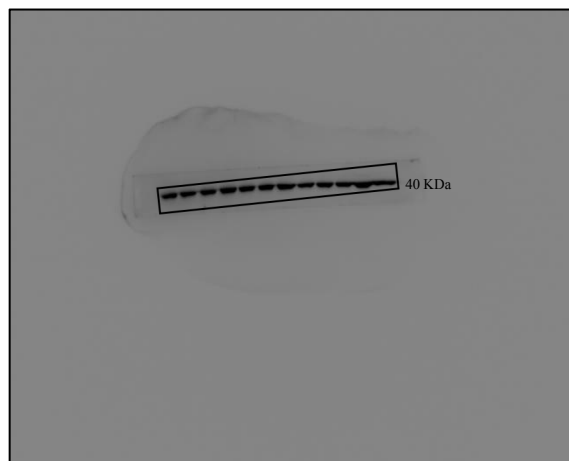

$\gamma$ H2A

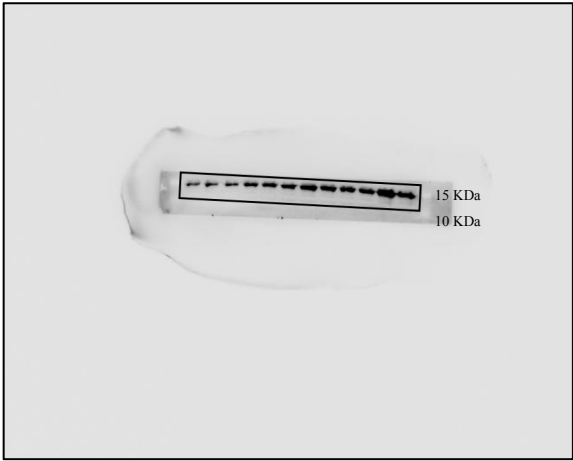

GAPDH

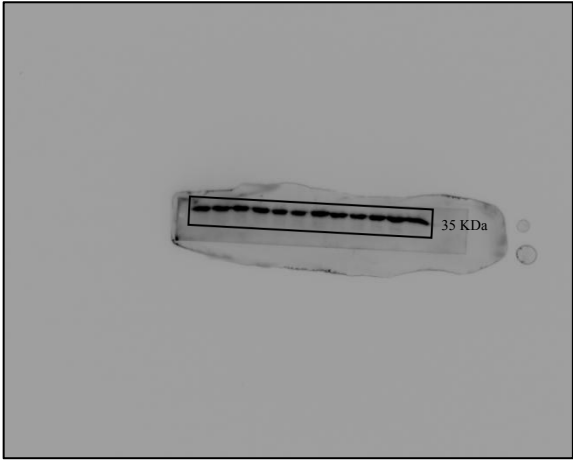

Figure 14C

ATR

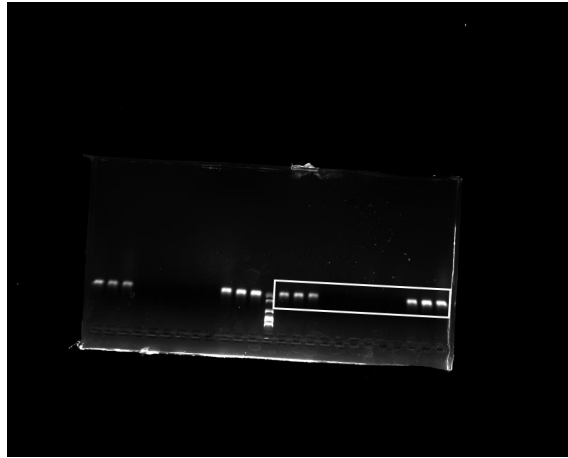

TSG101

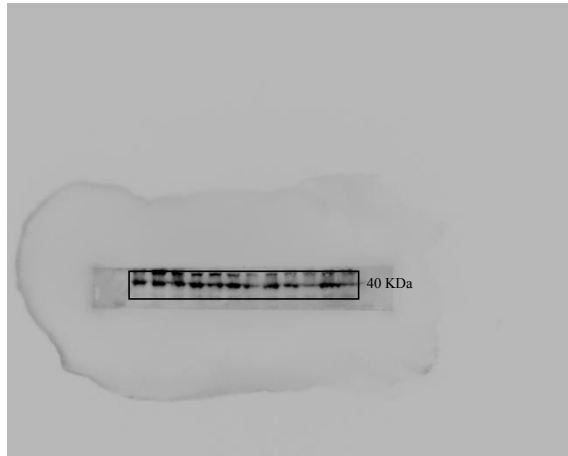

CD63

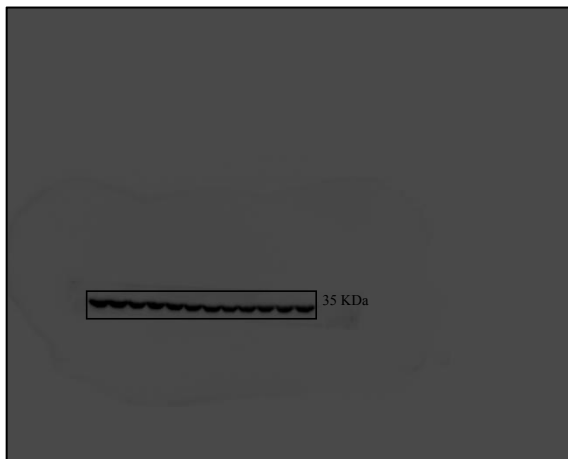

CD9



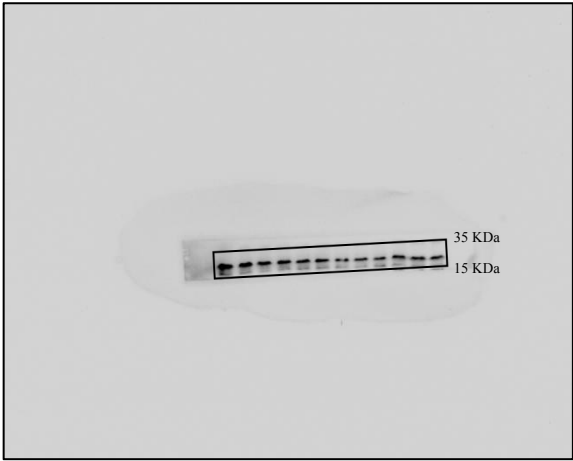

GAPDH

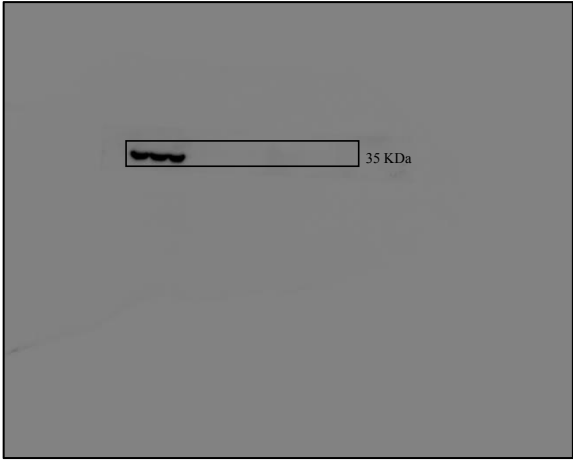

**Figure 14D**

ATR

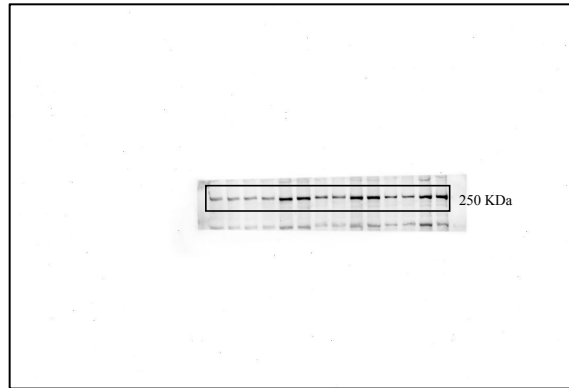

GAPDH

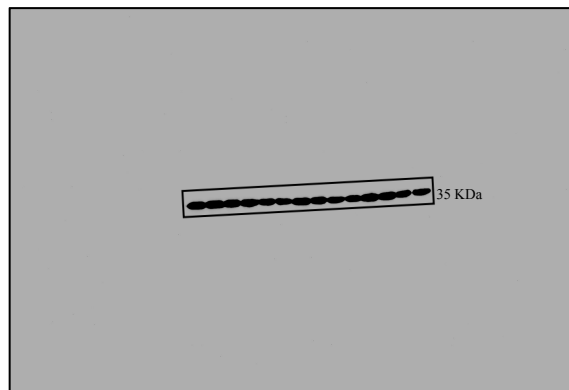

**Figure 14E**

p-p53

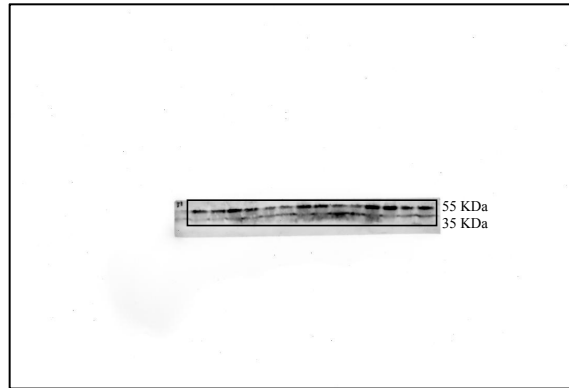

p21

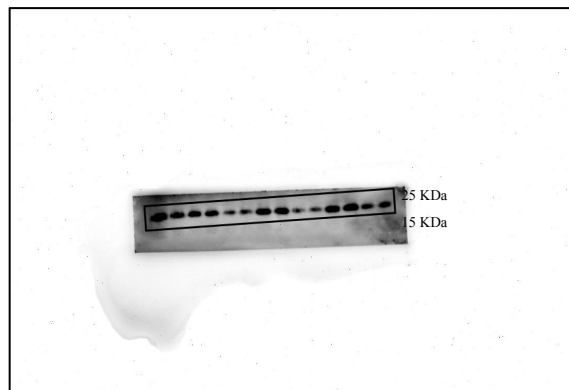

p16

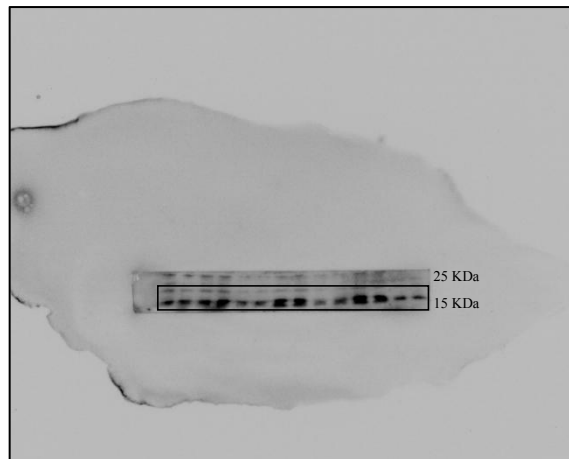

GAPDH

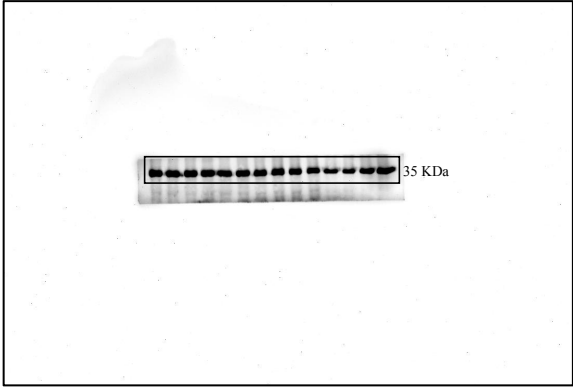

**Figure 14F**

cGAS

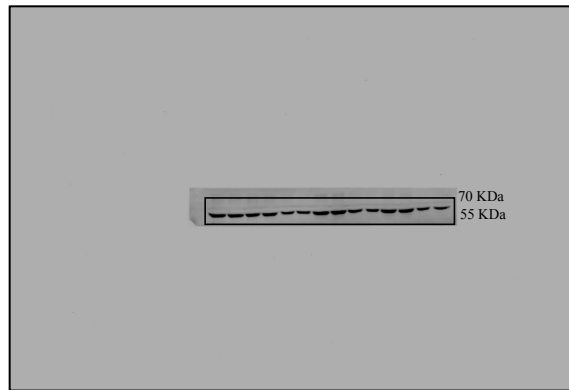

STING

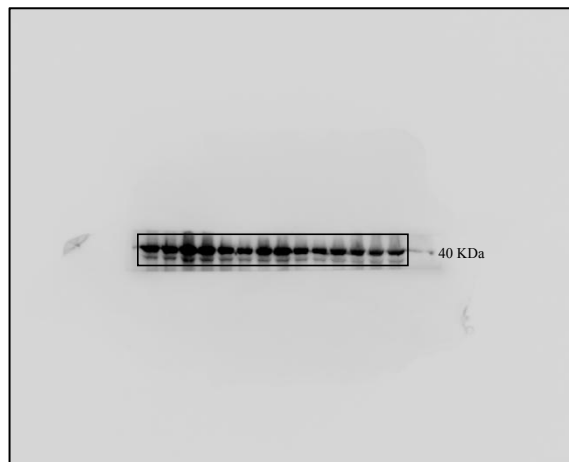

$\gamma$ H2A

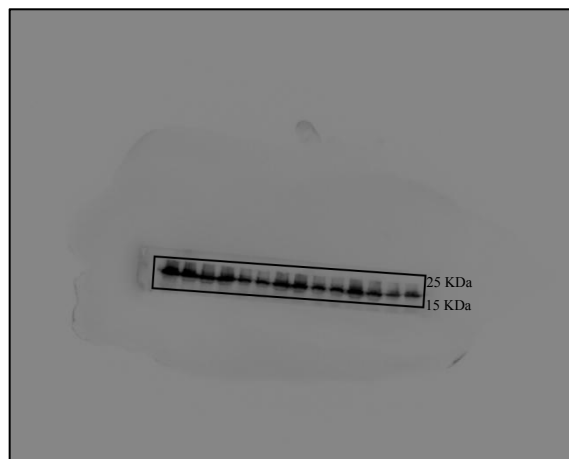

GAPDH

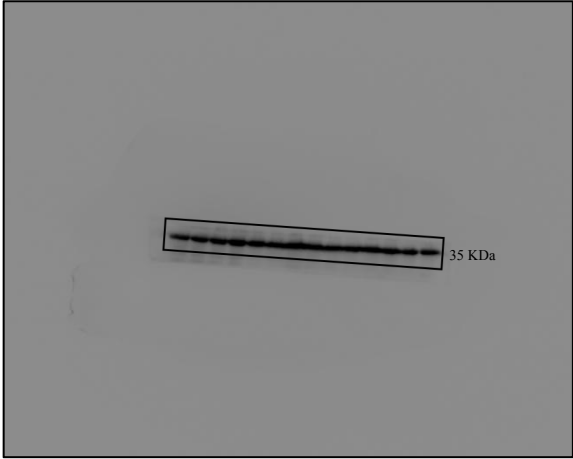

**Figure S1H**

Tubulin-PCNA

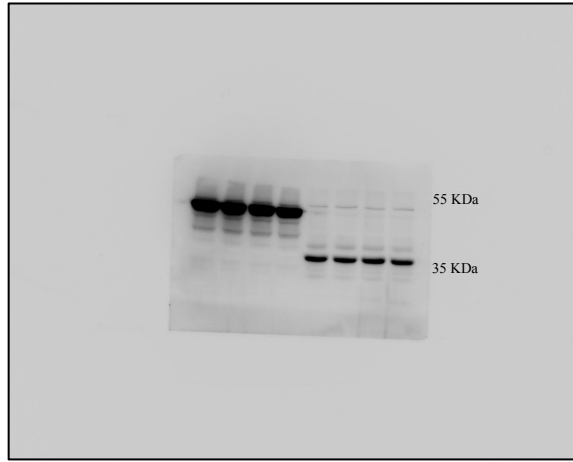

**Figure S1K**

IB: AIM2

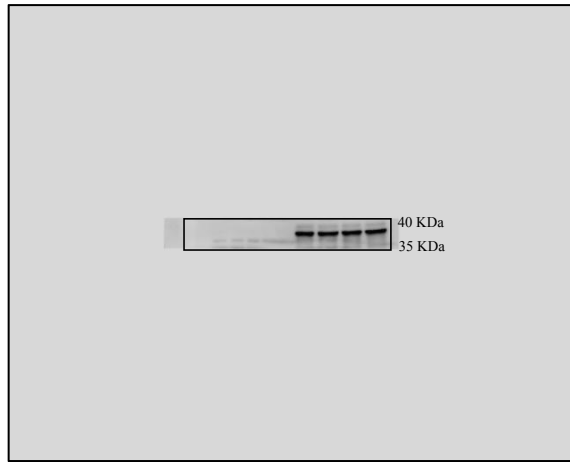

IB: pro caspase-1

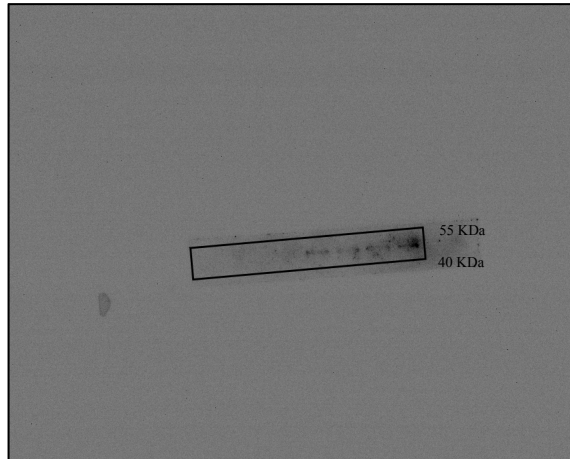

IB: ASC

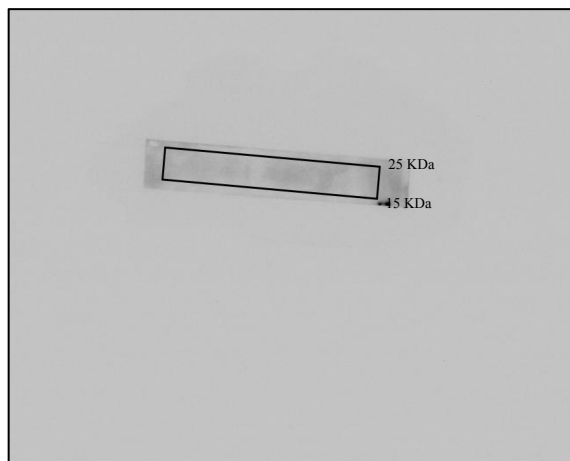

Input: AIM2



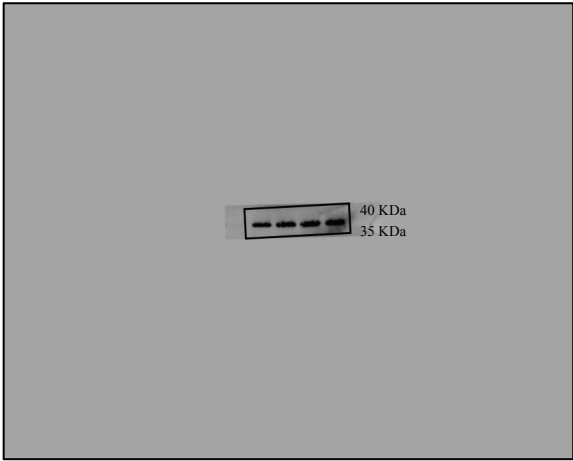

Input: pro-caspase-1

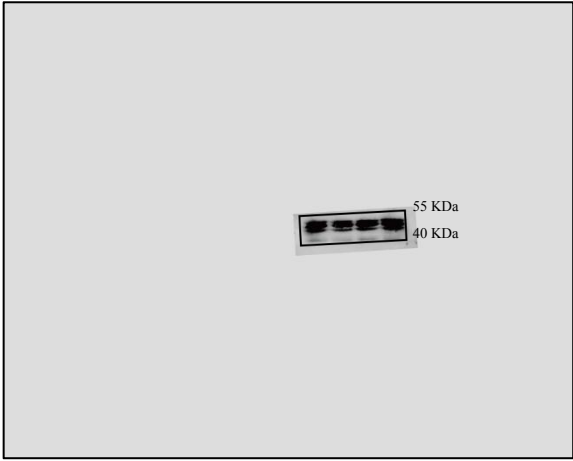

Input: ASC

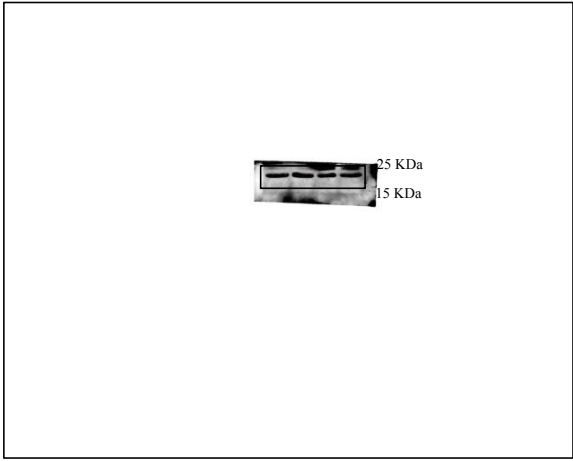

Input: GAPDH

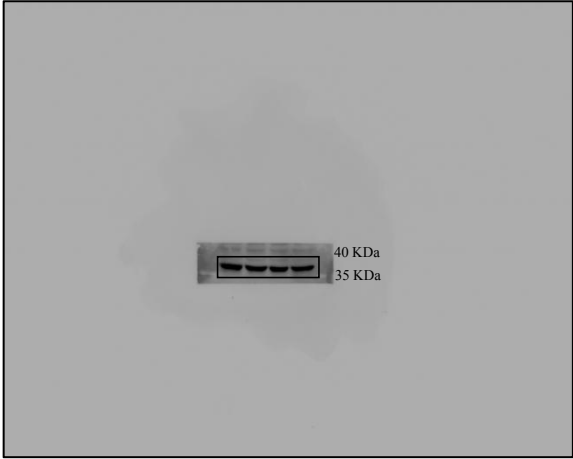

**Figure S1L**

gDNA: POLG1; LAD12

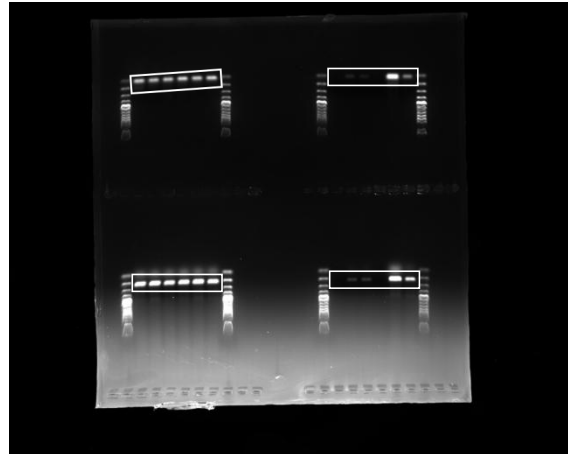

gDNA: L1ORF1; 18S RNA

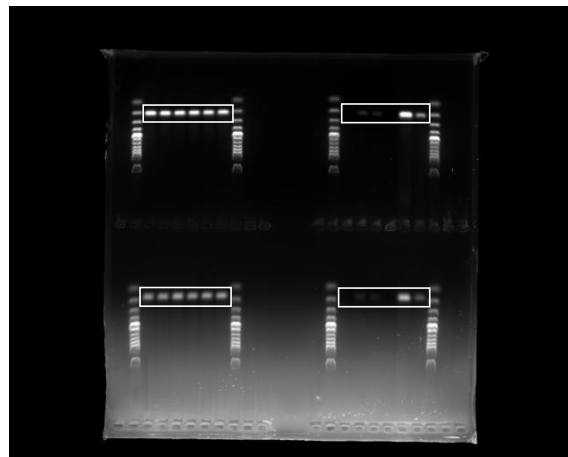

IB: cGAS

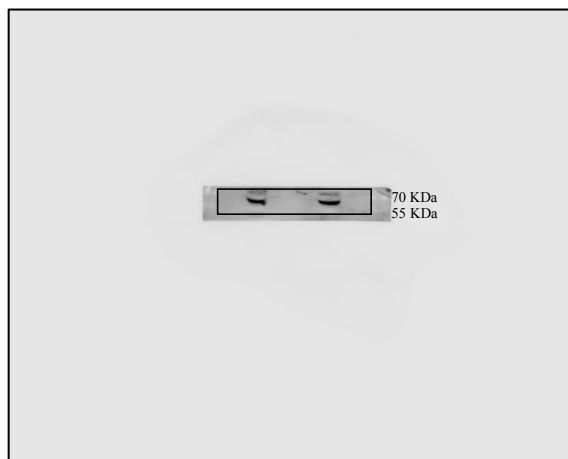

IB: AIM2

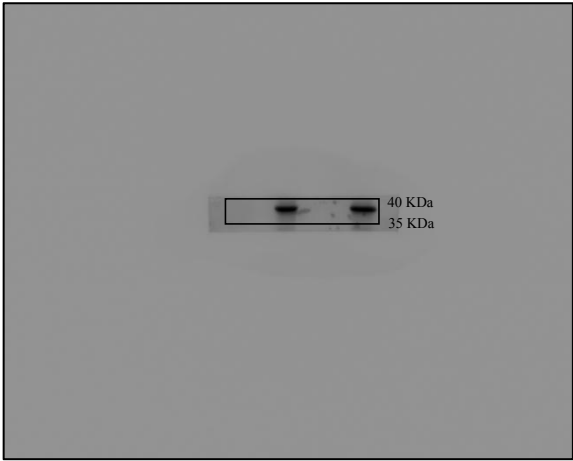

Input: cGAS

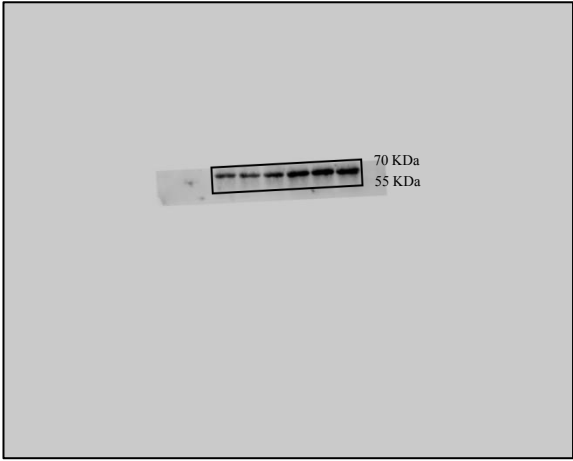

Input: AIM2

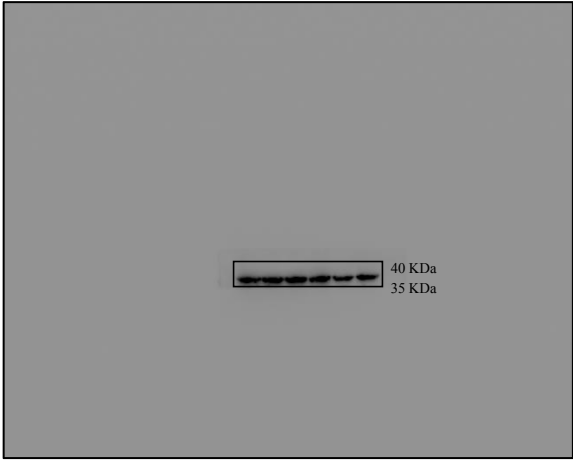

Input:  $\beta$ -actin

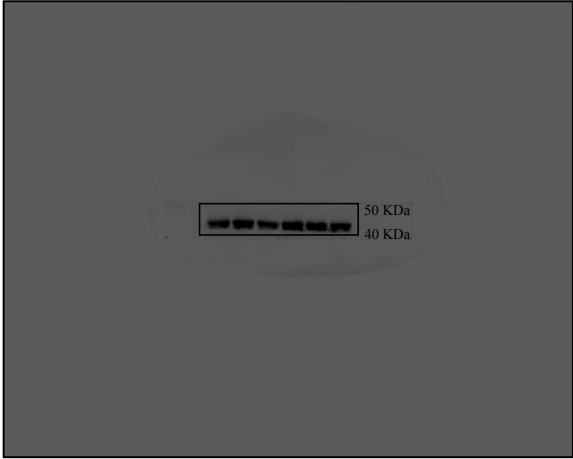

**Figure S1M**

cGAS

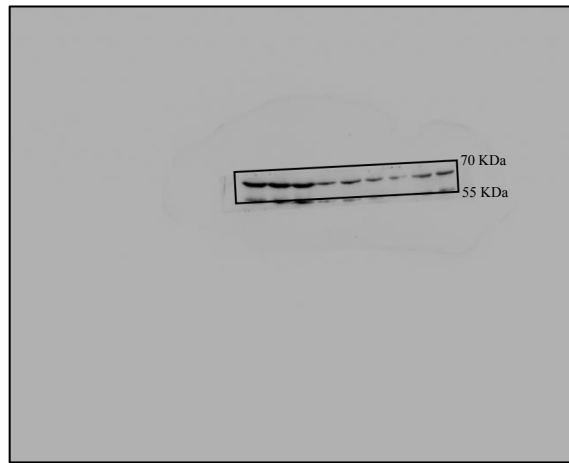

GAPDH

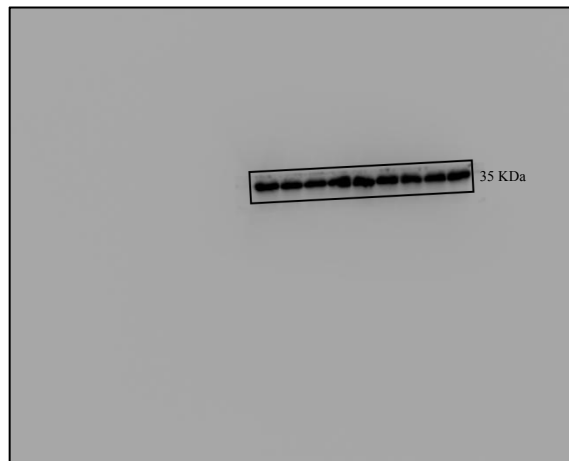

AIM2

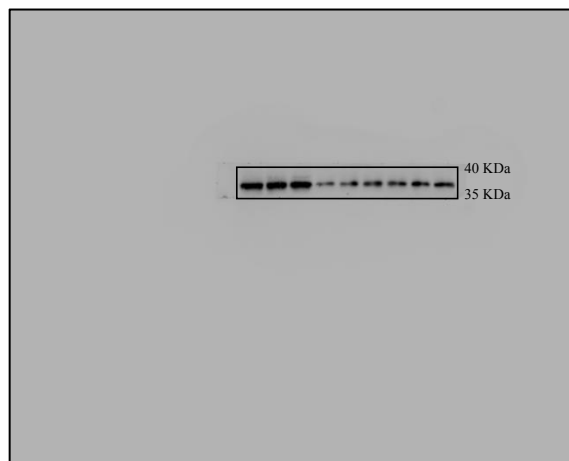

GAPDH

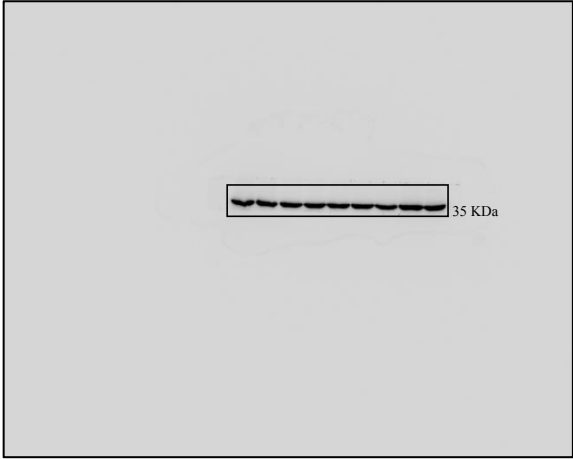

Figure S1N

53BP

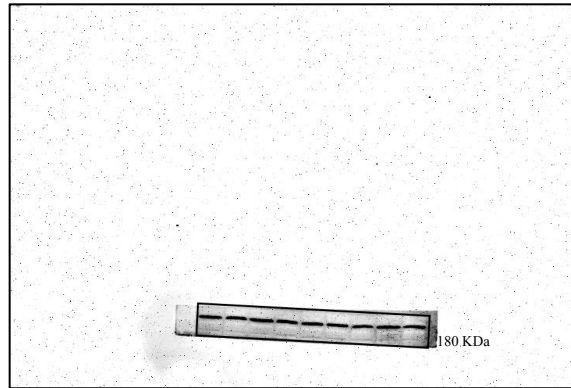

$\gamma$ H2A

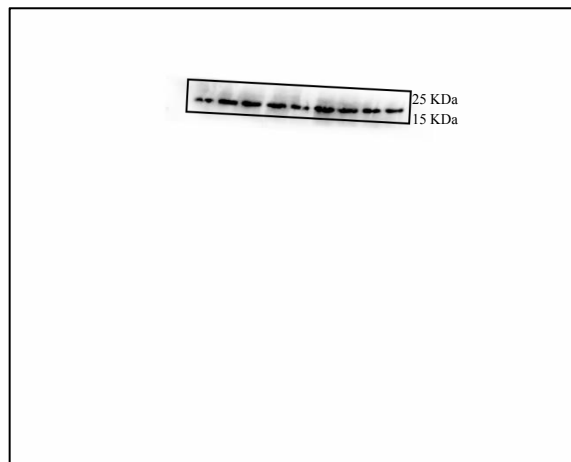

GAPDH

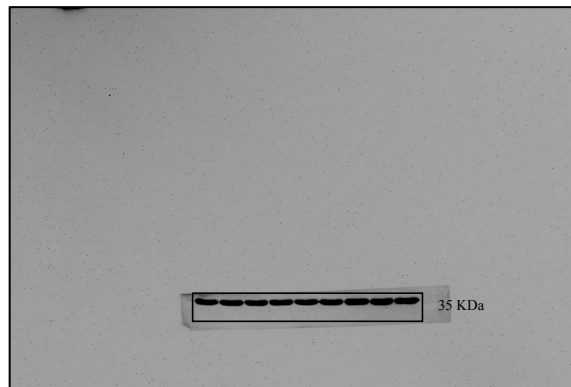

53BP



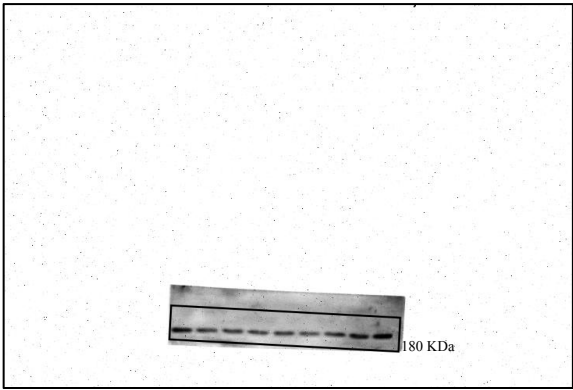

$\gamma$ H2A

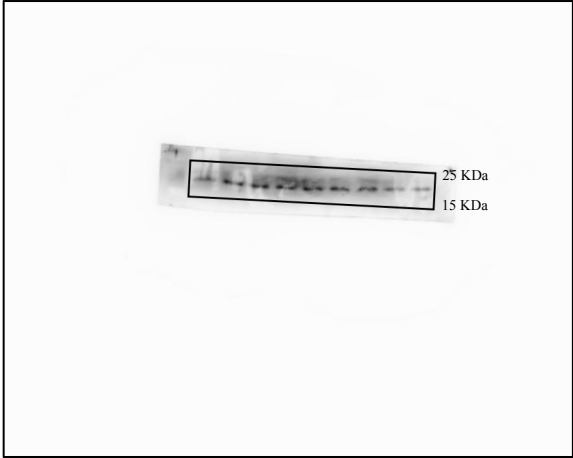

GAPDH

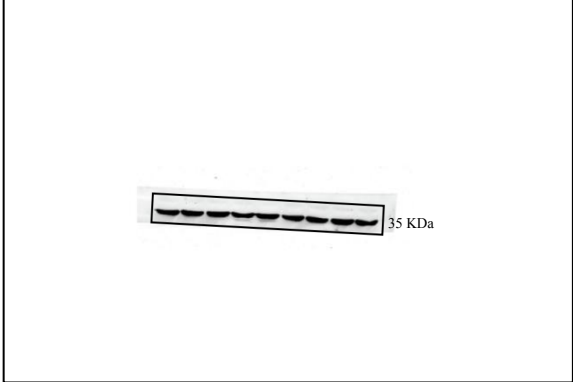

Figure S1O

p-p53

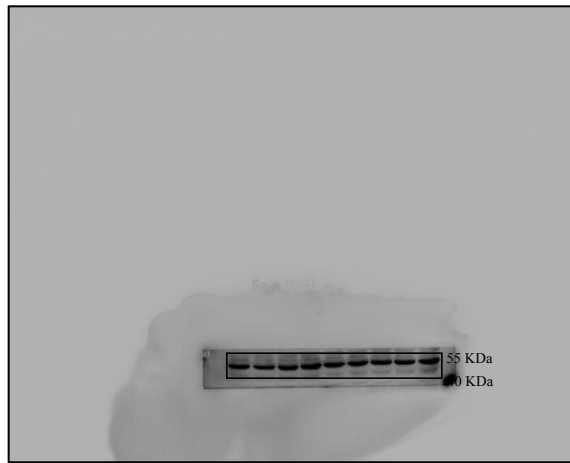

p21

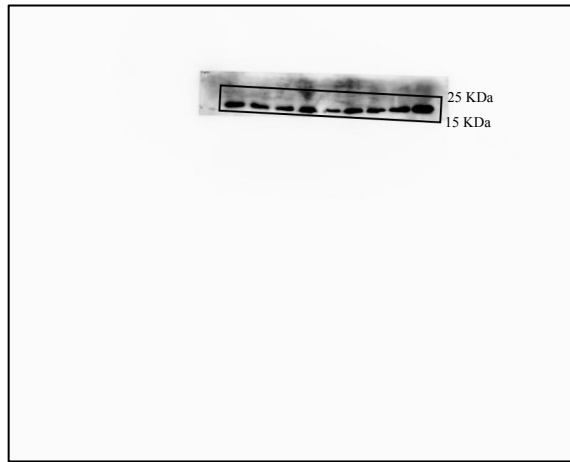

GAPDH

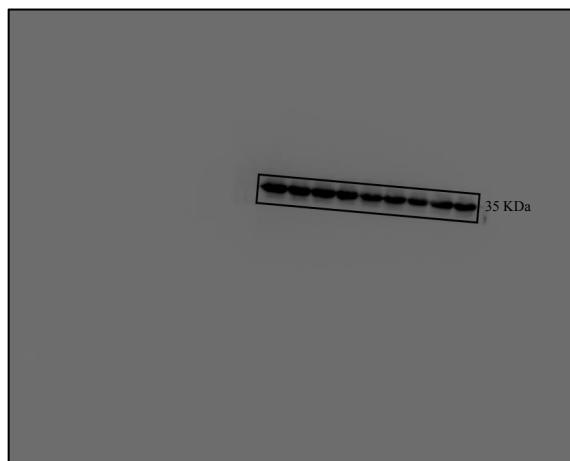

p-p53

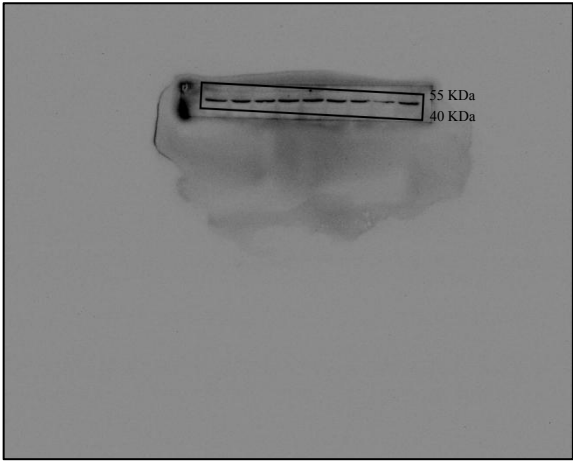

p21

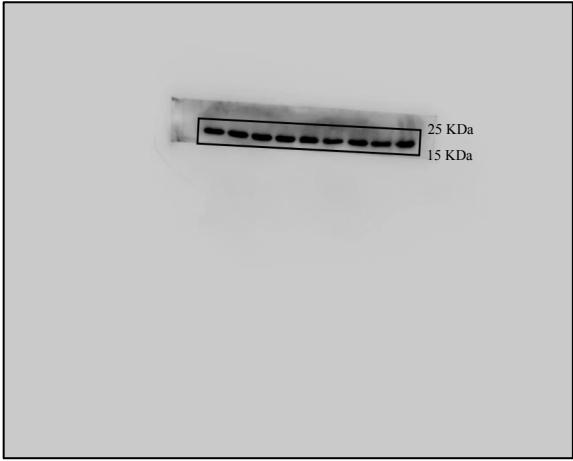

GAPDH

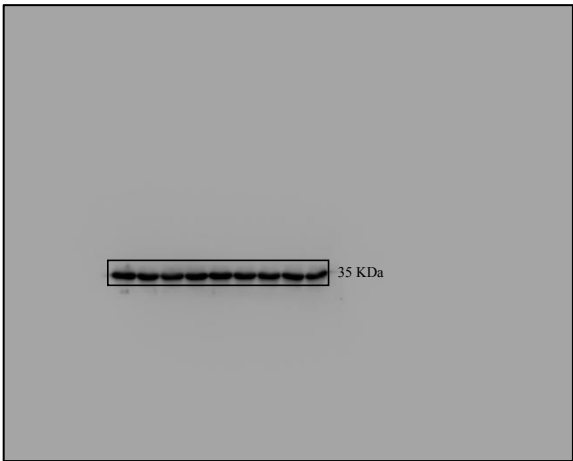

**Figure S1P**

cGAS

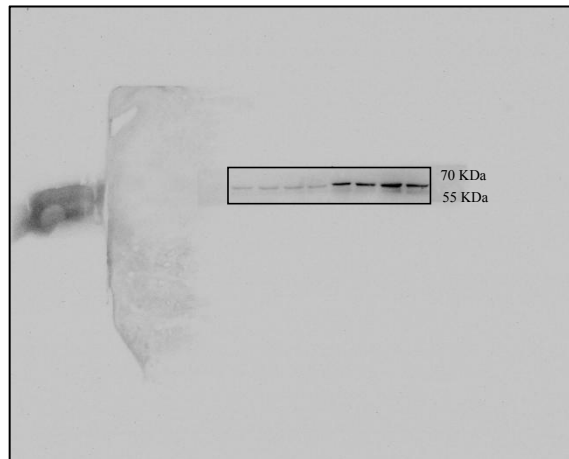

p-STING

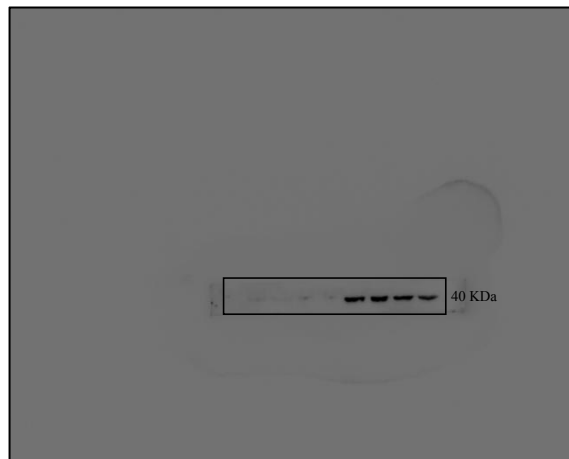

STING

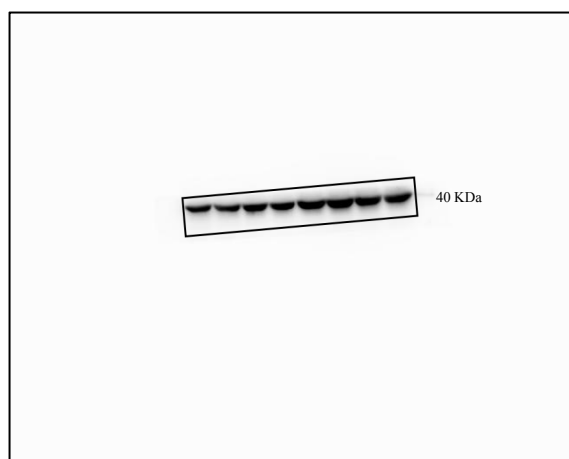

GAPDH

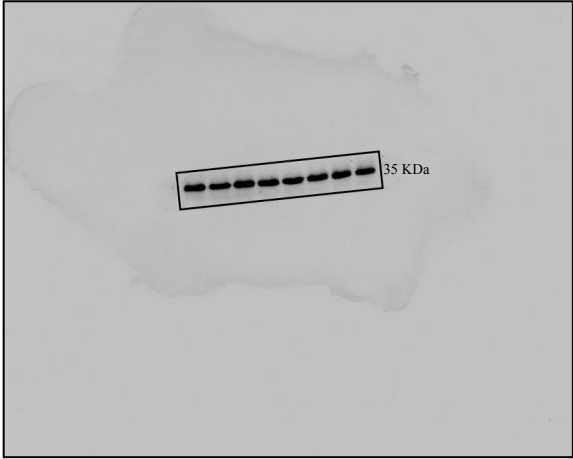

**Figure S3B**

NLRP3

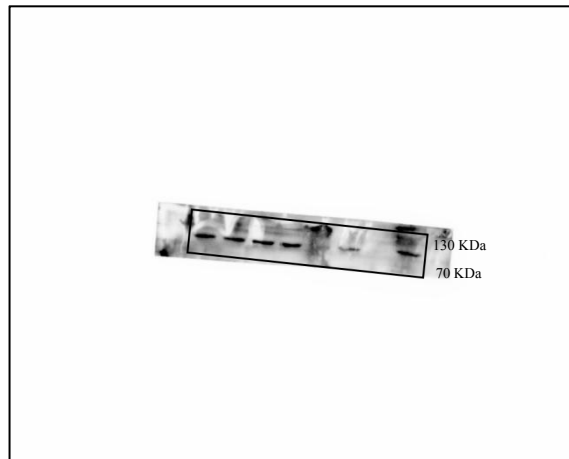

Caspase-1

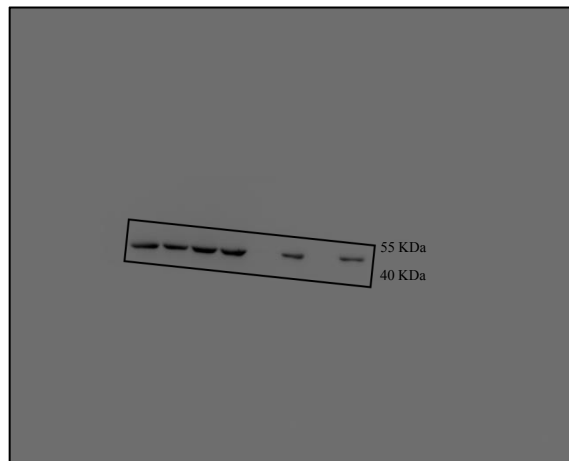

ASC

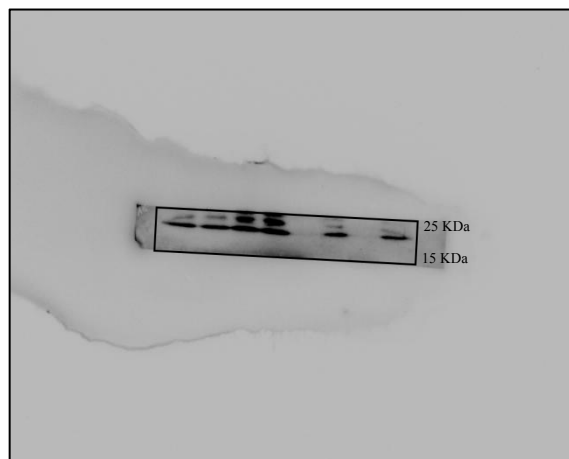

GAPDH

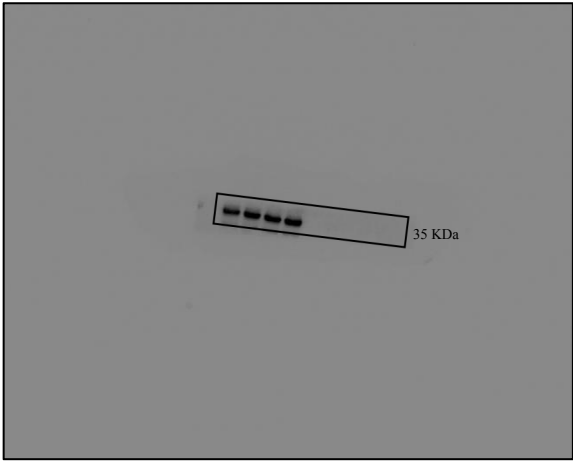

**Figure S3D**

NLRP3

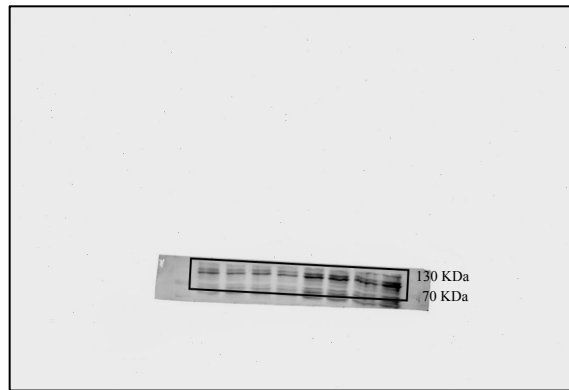

caspace-1

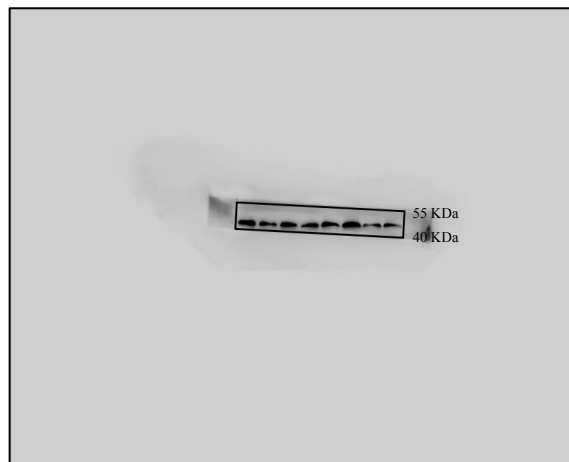

ASC

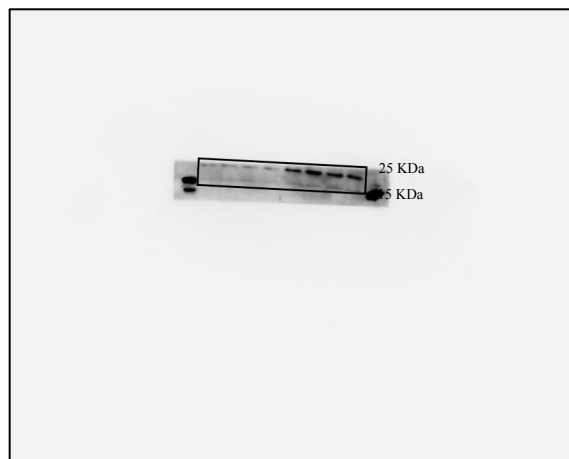

GSDMD



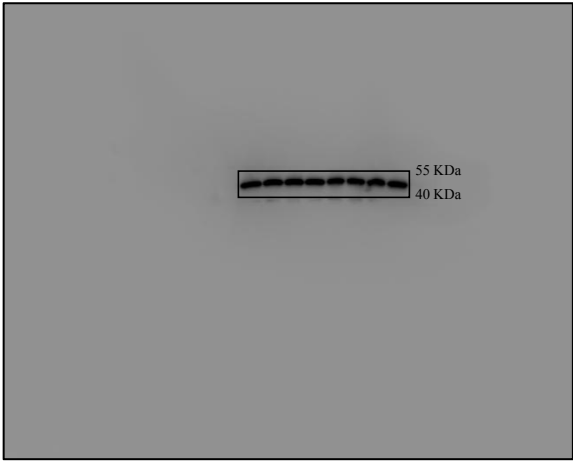

Cleaved caspase-1

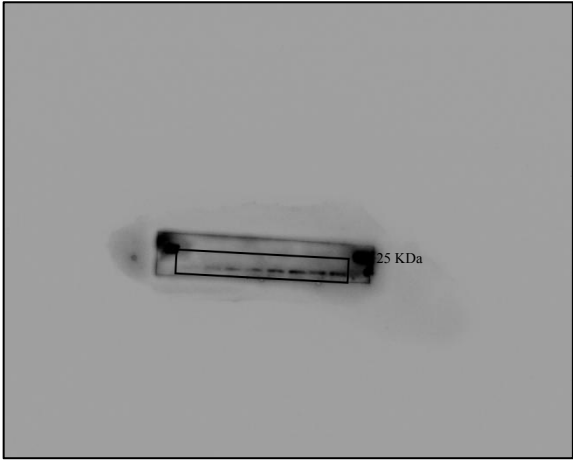

Cleaved GSDMD

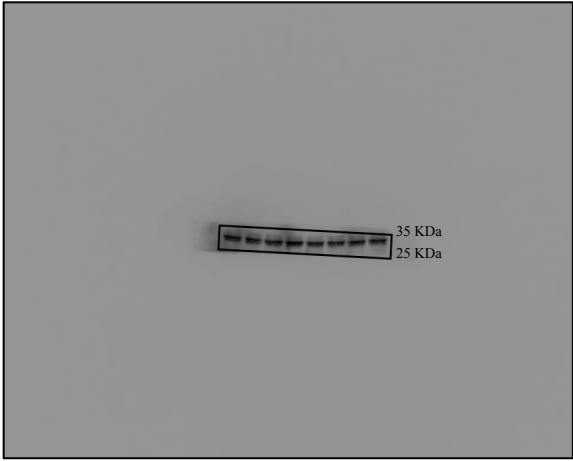

GAPDH

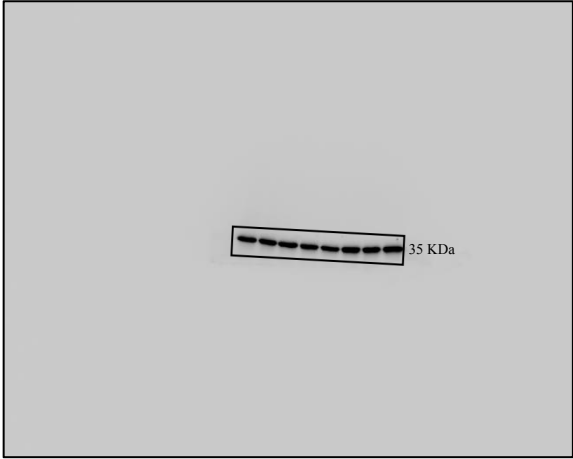

Figure S3F

NLRP3

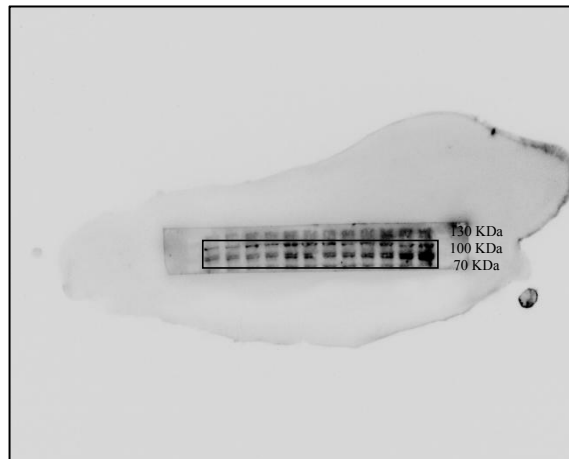

GSDMD

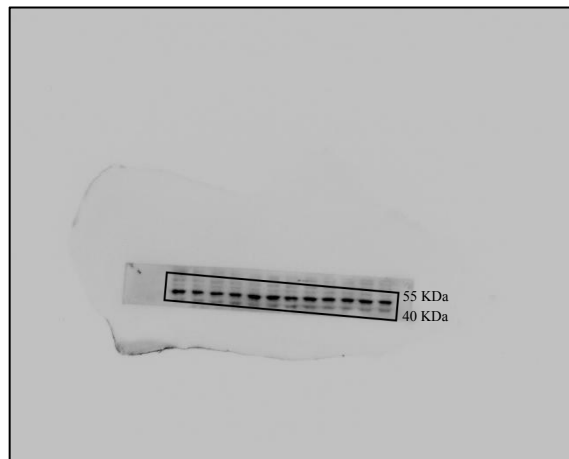

Cleaved GSDMD

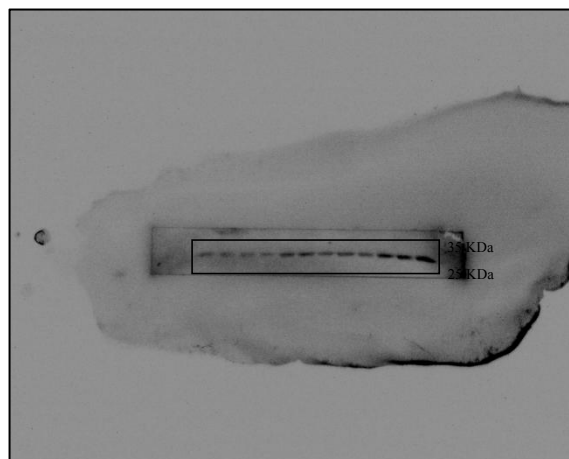

Caspase-1

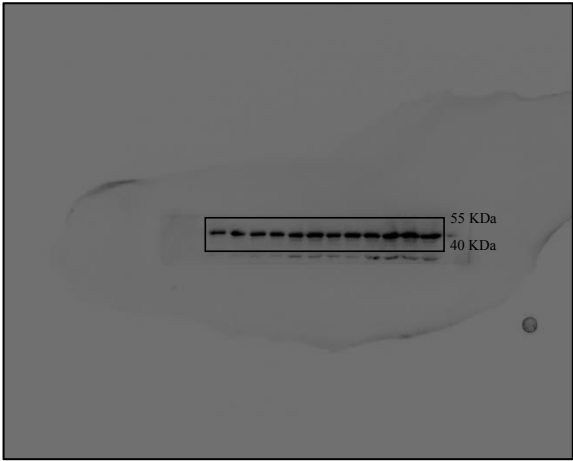

Cleaved caspase-1

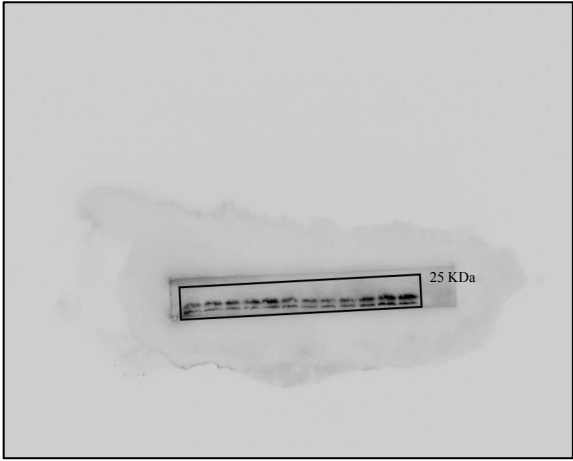

GAPDH

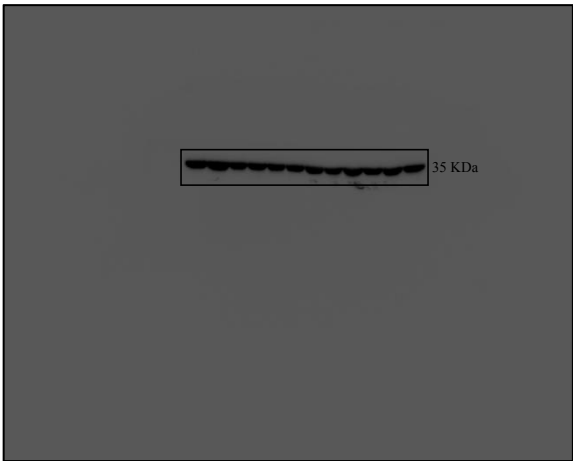

**Figure S3G**

IP:NLRP3-IP

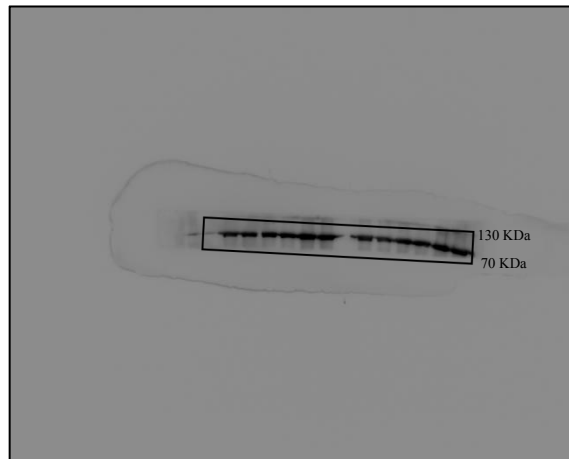

IP: caspase-1-IP

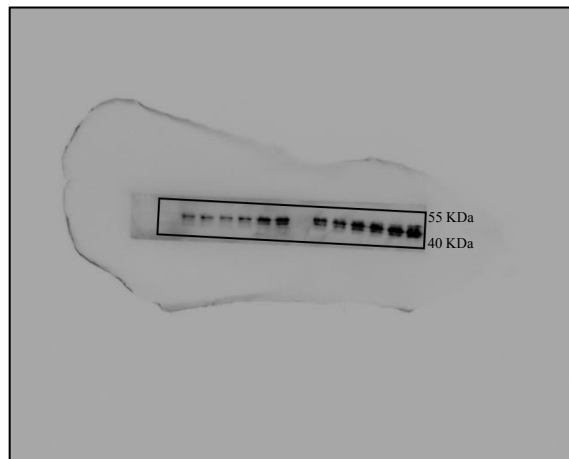

IP: ASC

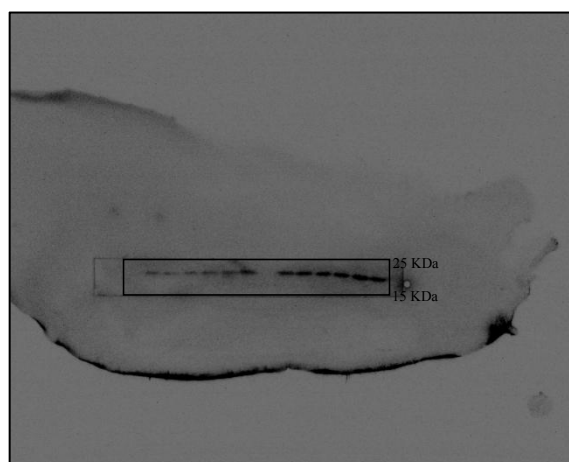

Input: NLRP3

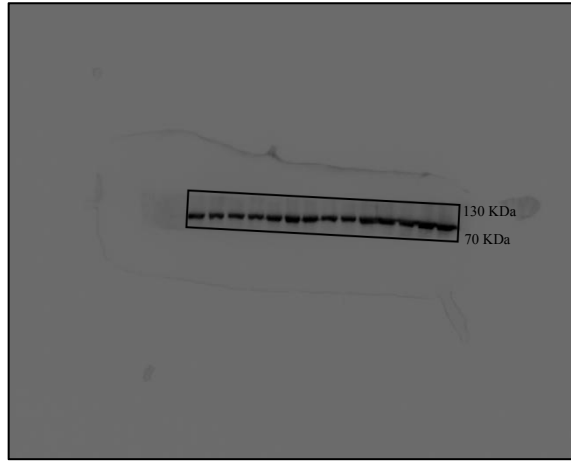

Input: Caspase-1

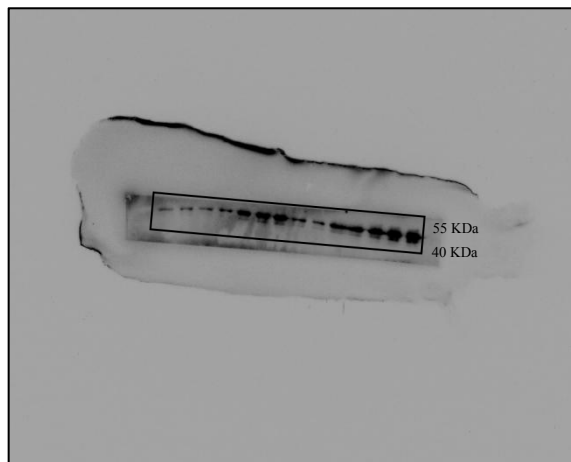

Input: ASC

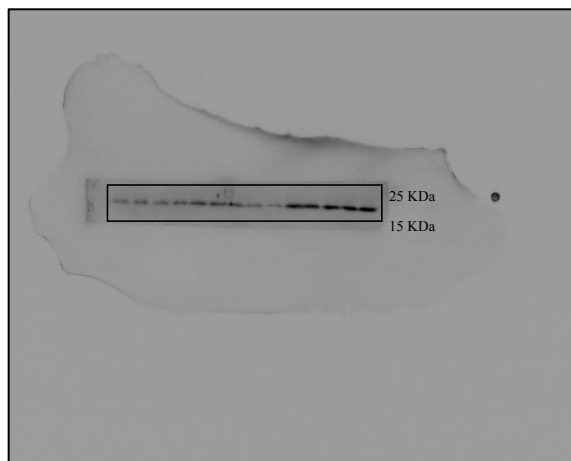

Input: GAPDH

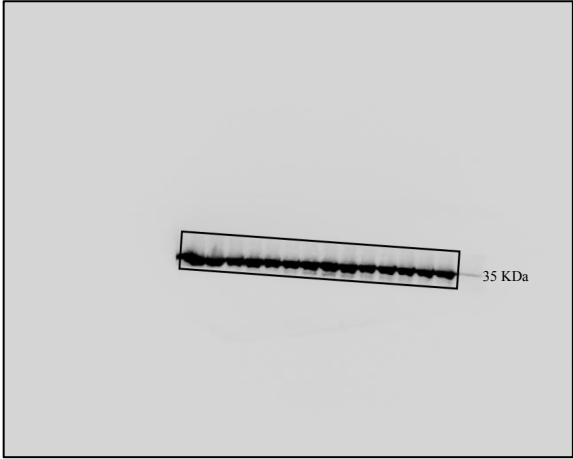

Figure S4A

cDNA: ATR

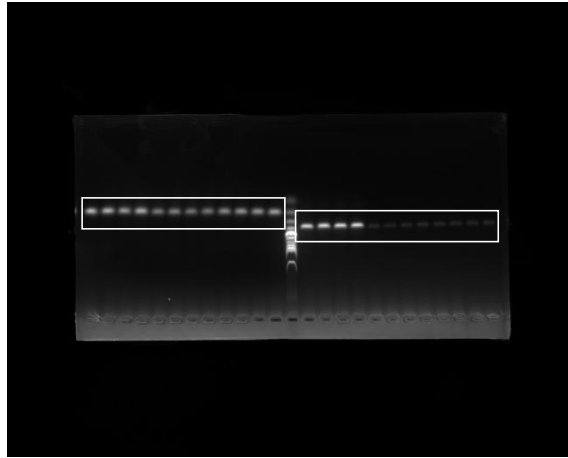

ATR

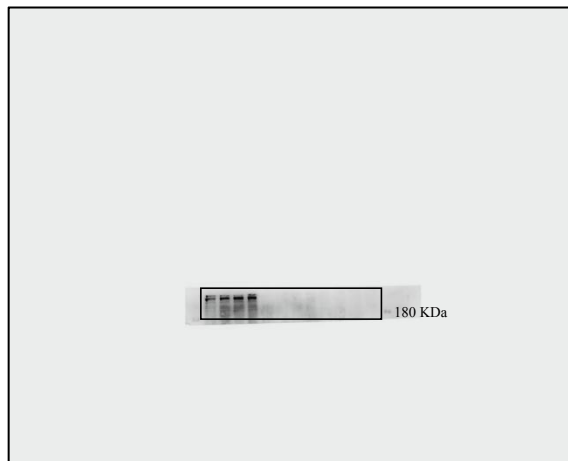

GAPDH

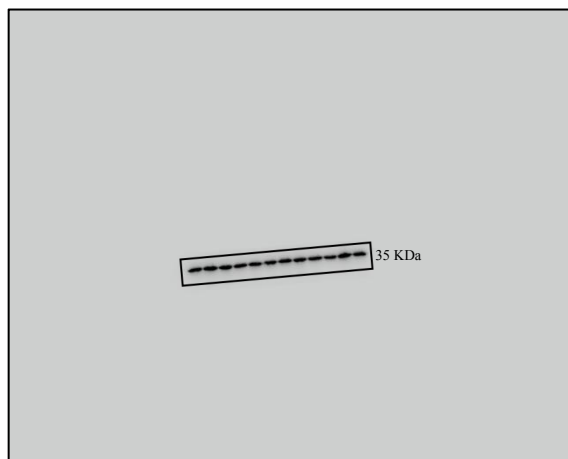



Figure S4D

p-p53

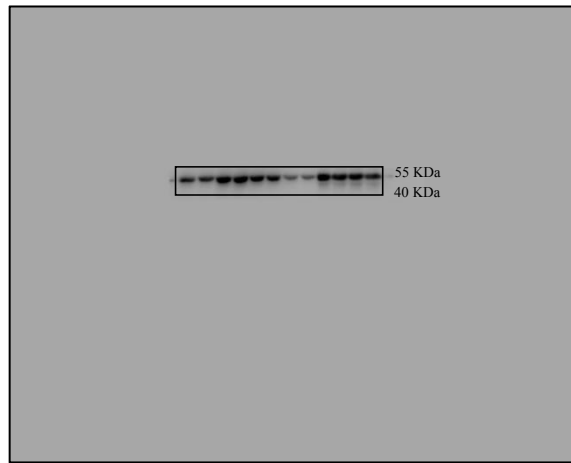

p21

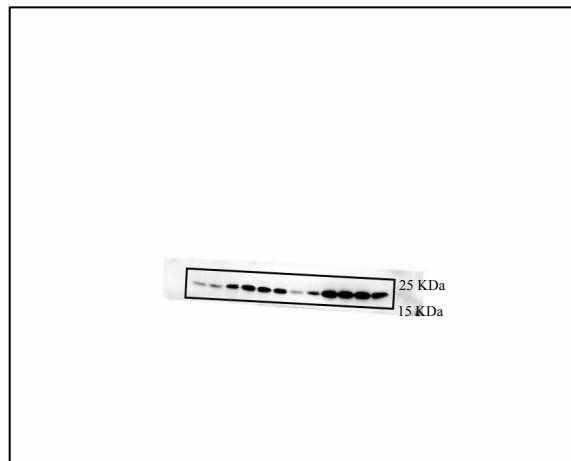

GAPDH

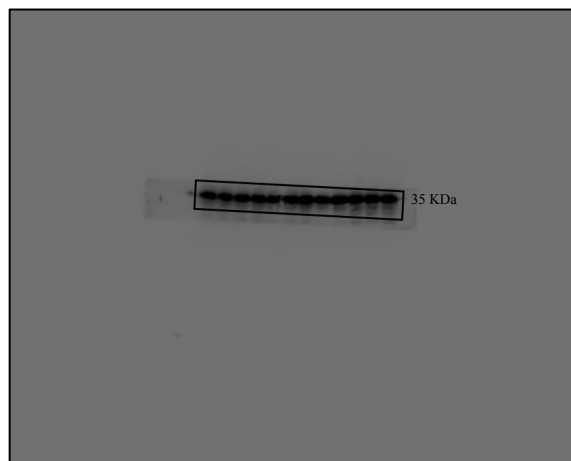

Figure S4E

cGAS

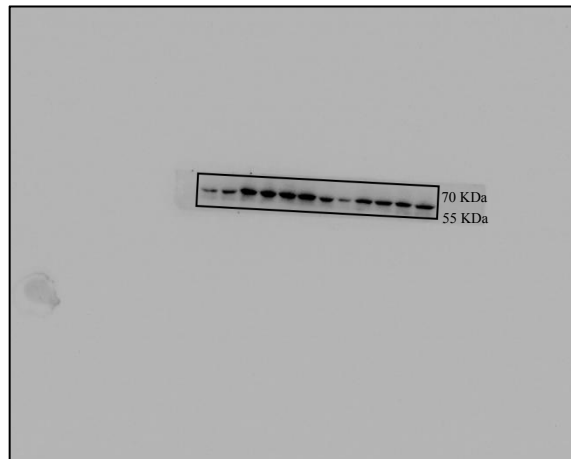

p-STING

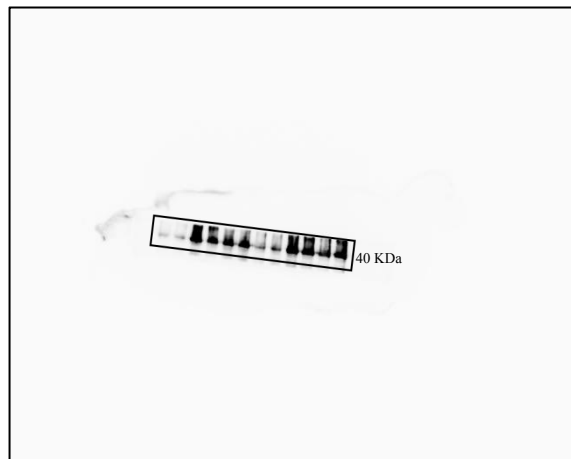

STING

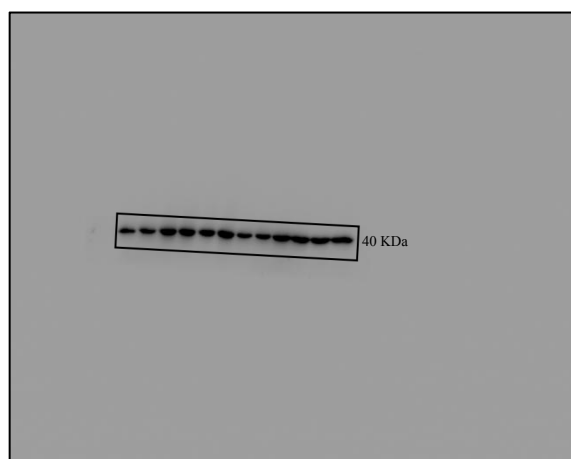

$\gamma$ H2A

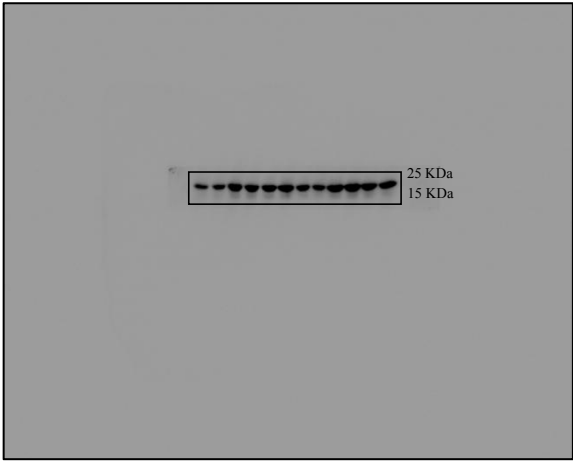

GAPDH

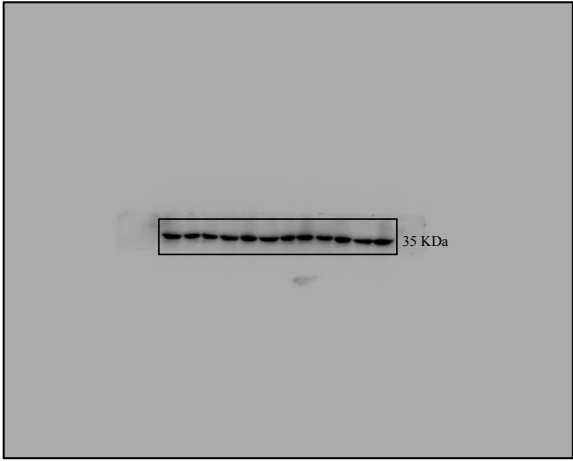

**Figure S4F**

ATR

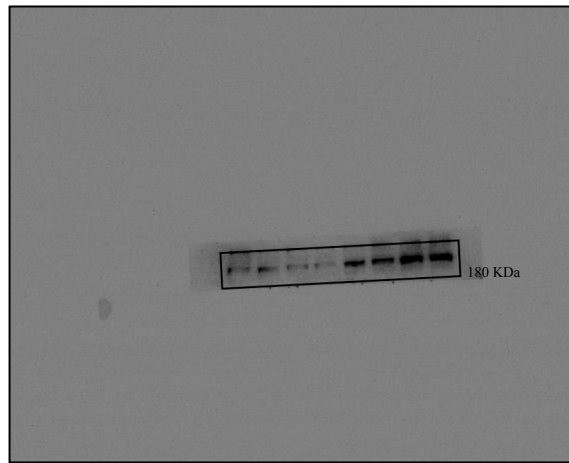

GAPDH

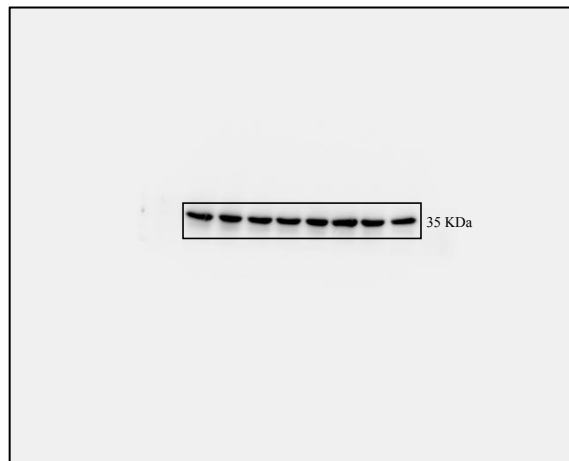

**Figure S4G**

p-p53

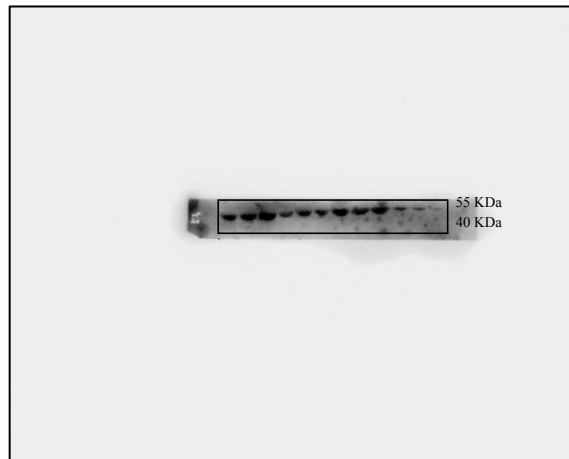

p21

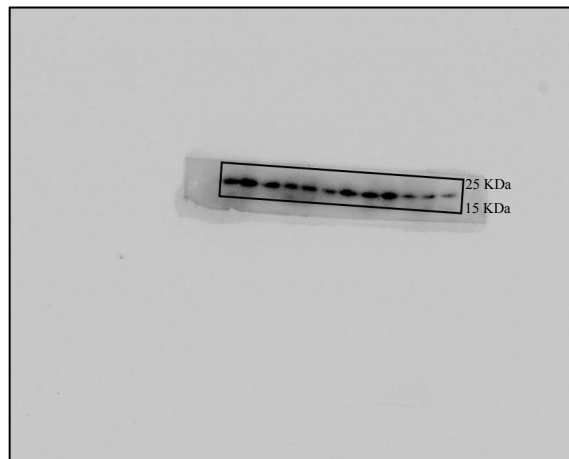

GAPDH

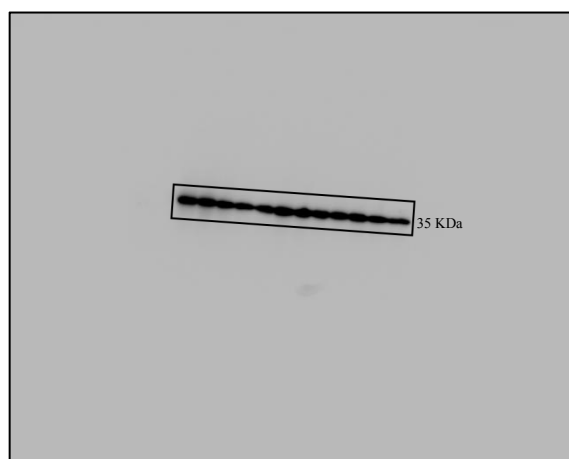

**Figure S4K**

cGAS

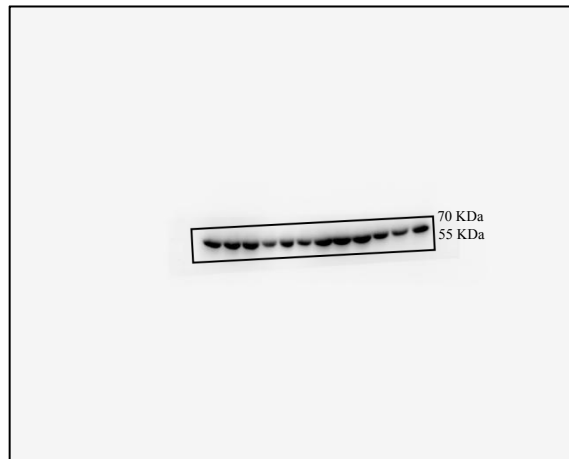

p-STING

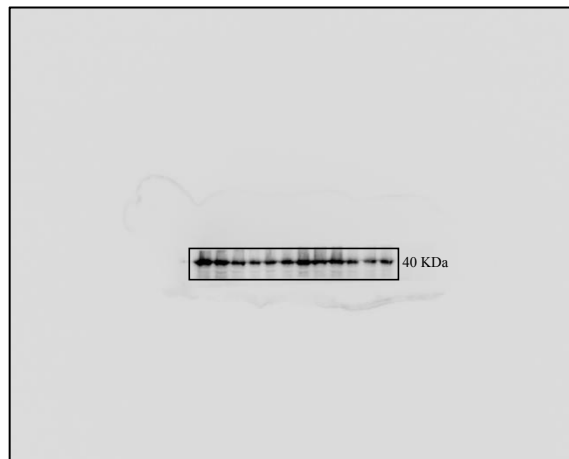

STING

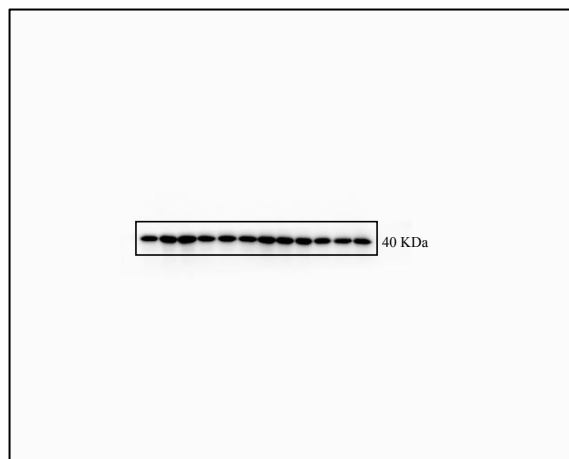

$\gamma$ H2A

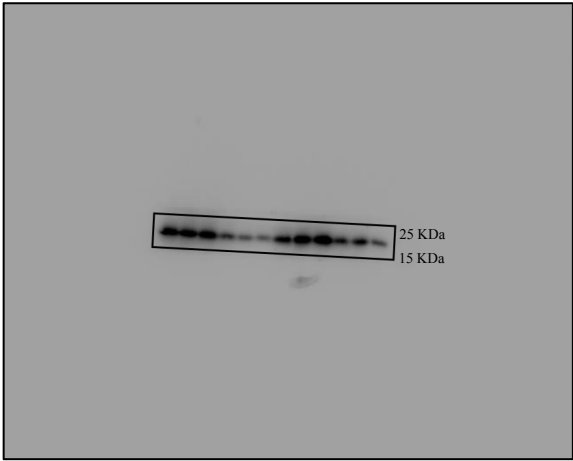

GAPDH

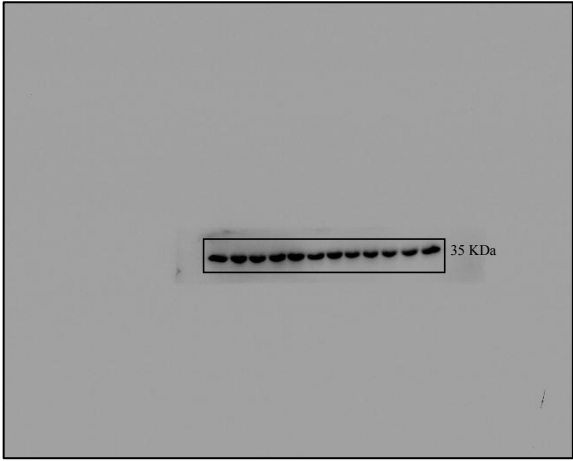

Figure S4N

p-p53

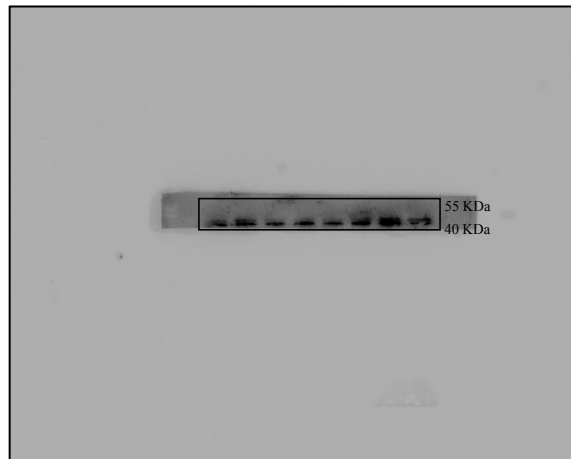

p21

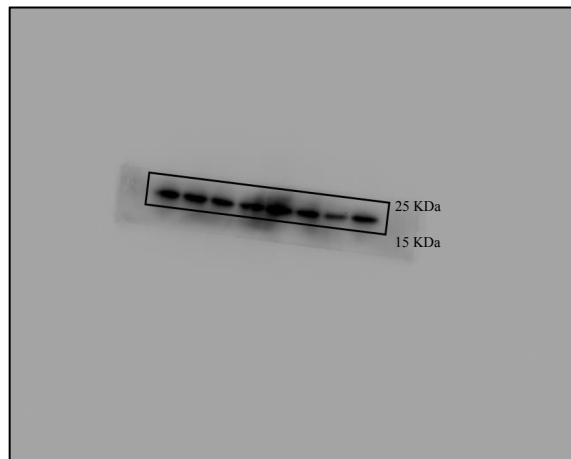

p16

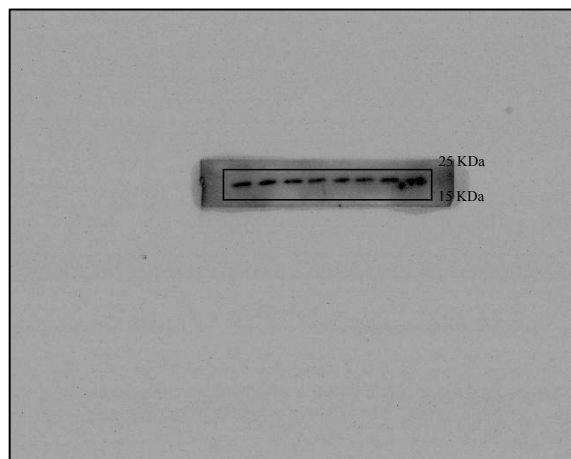

GAPDH



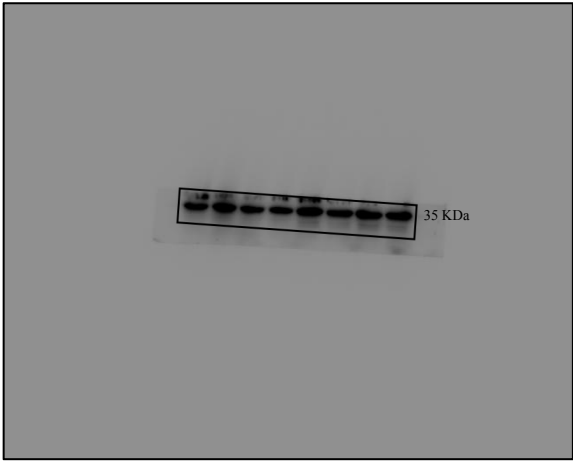

cGAS

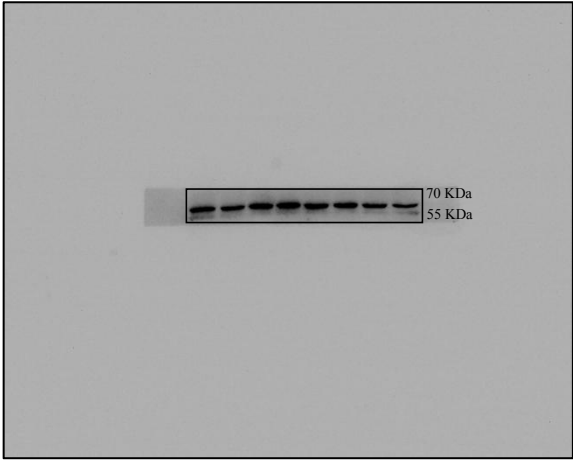

STING

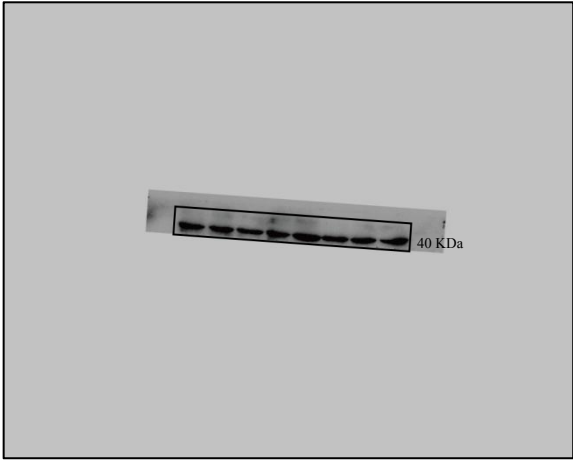

$\gamma$ H2A

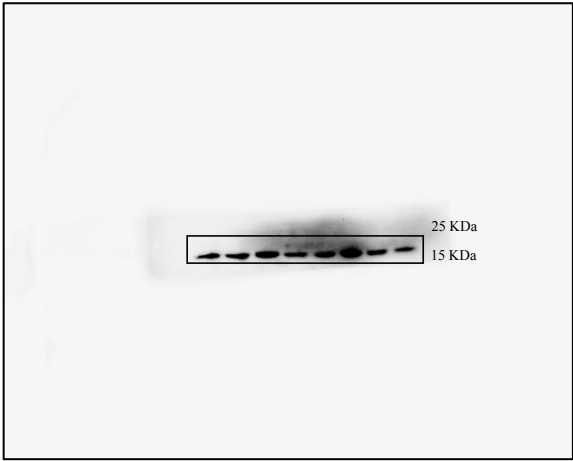

GAPDH

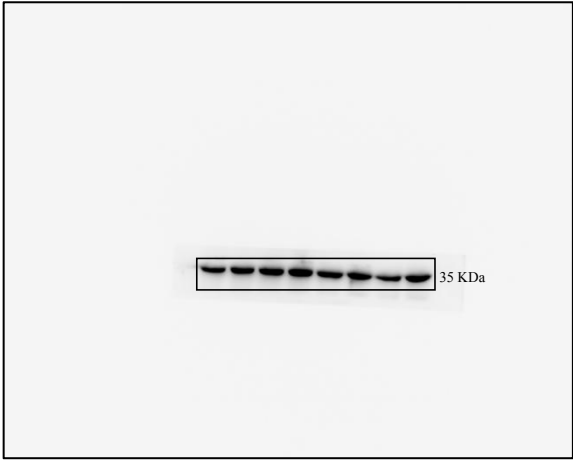

Figure S5A

ATR

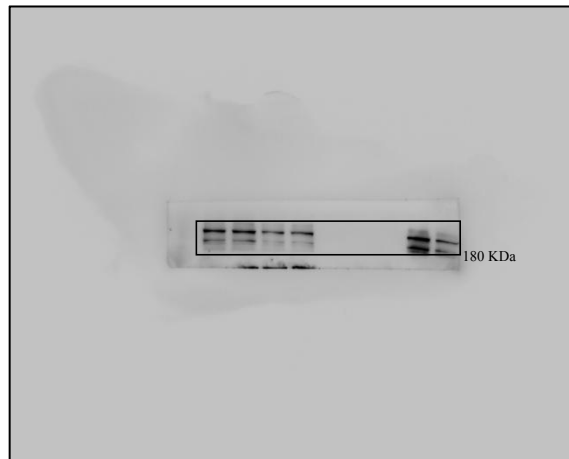

USP10

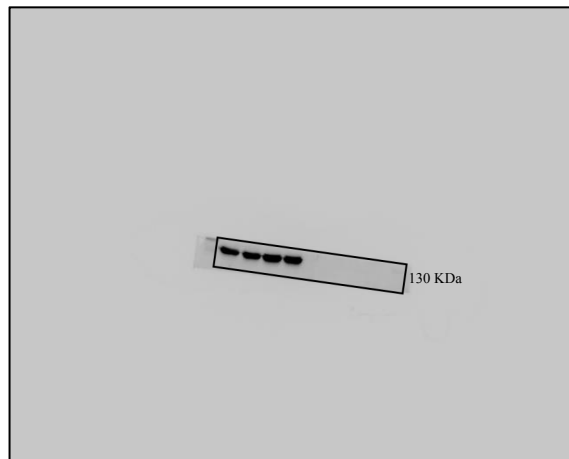

USP5

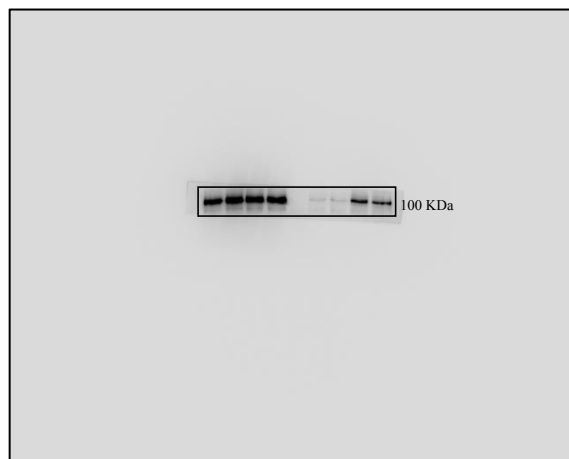

TRIM25

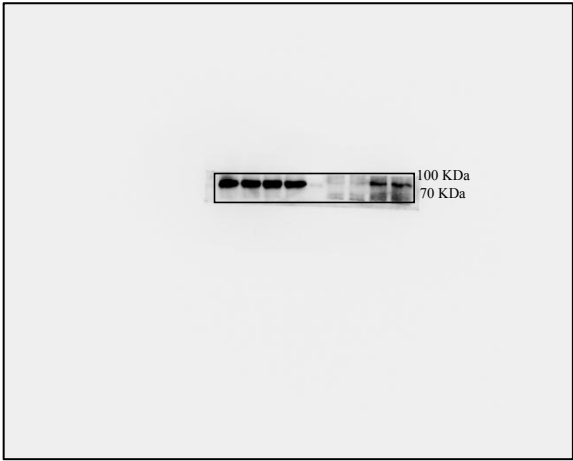

MKRN1

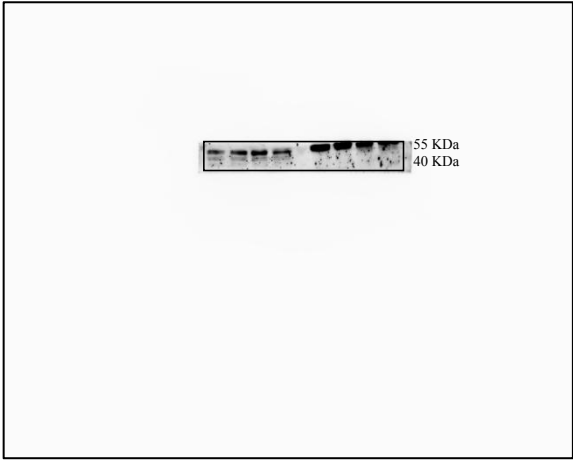

GAPDH

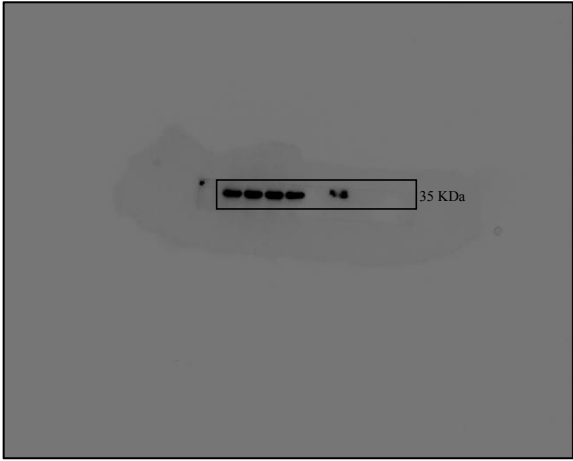

Figure S5B

ATR

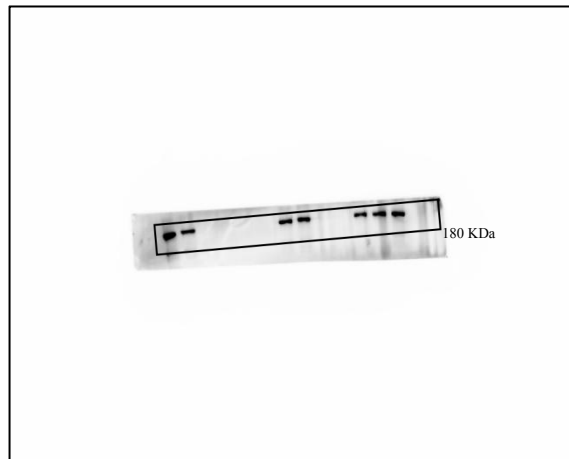

USP10

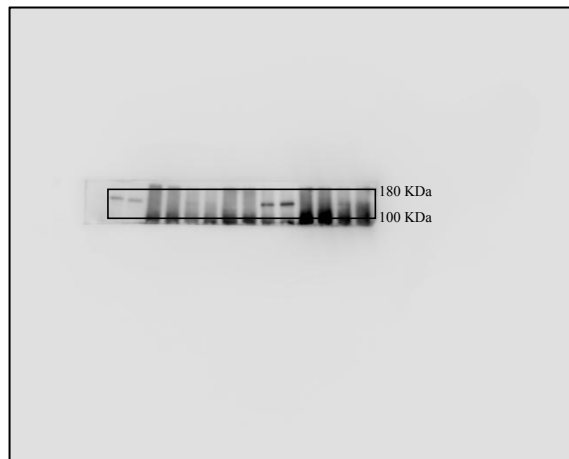

USP5

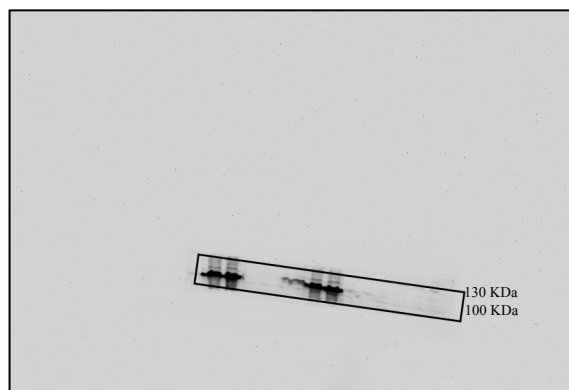

TRIM25

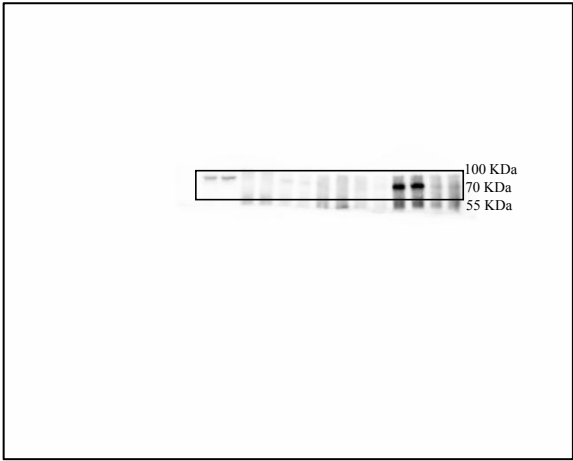

MKRN1

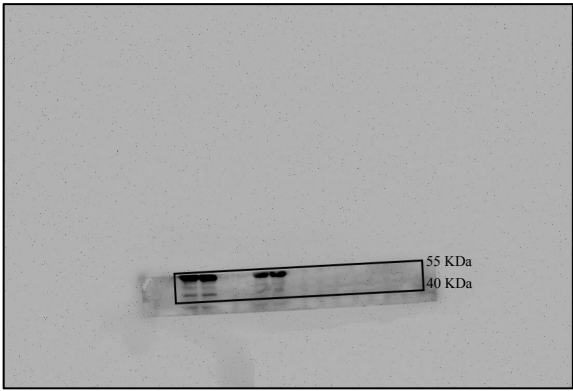

GAPDH

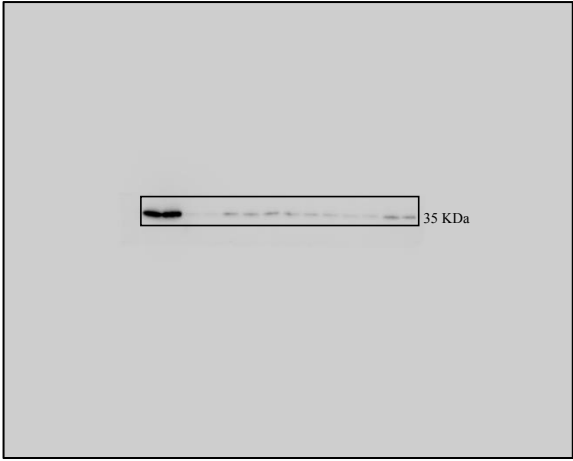

**Figure S5C**

IP:FLAG

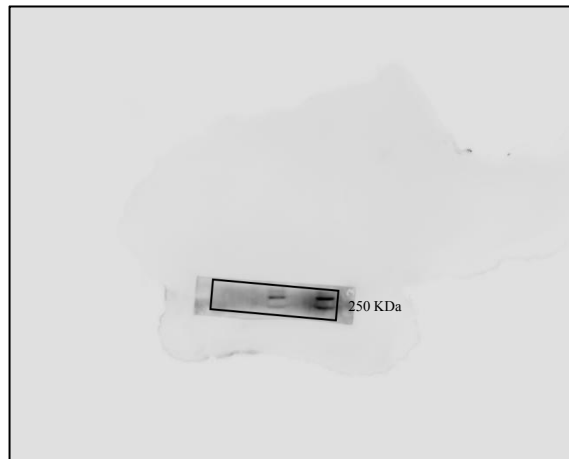

IP:MYC

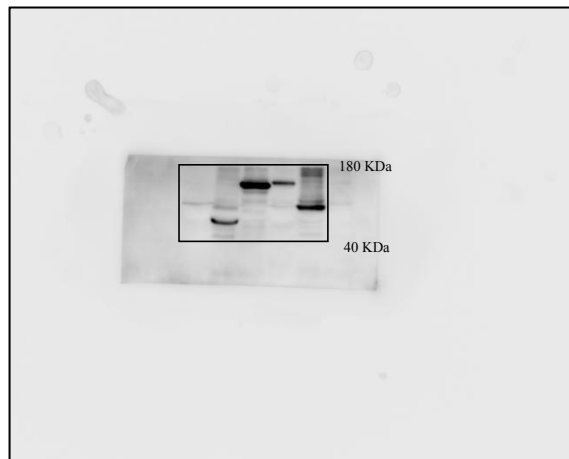

Input: Flag

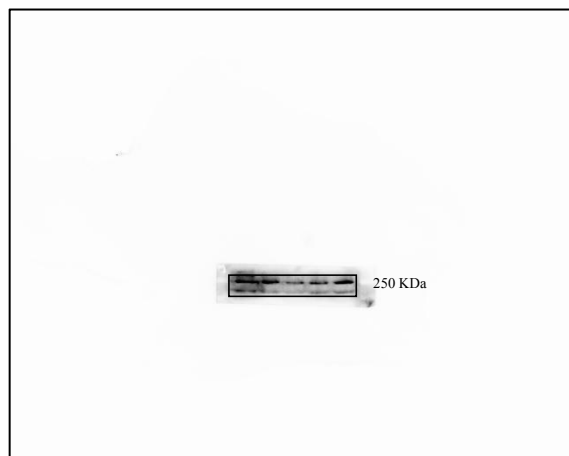

Input: MYC

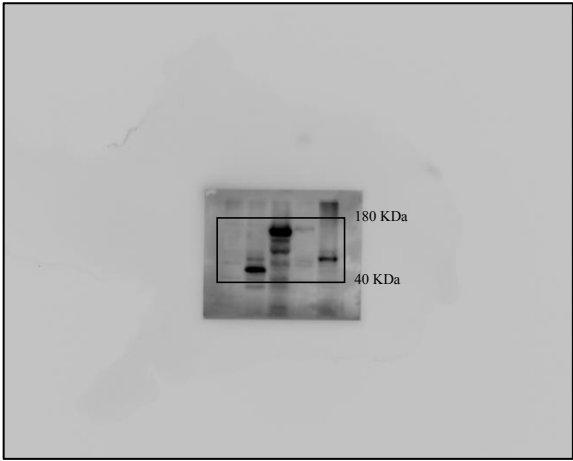

Input: GAPDH

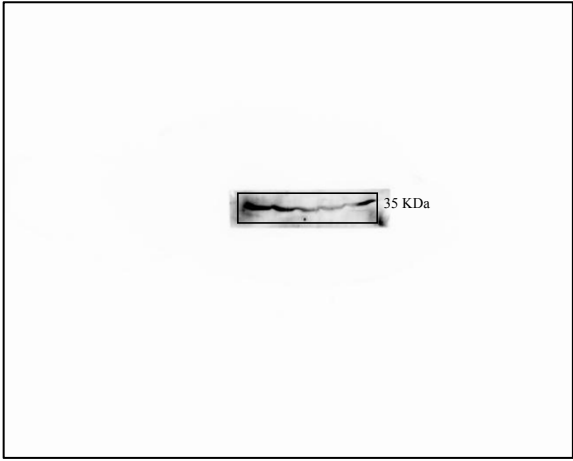

IP: Flag

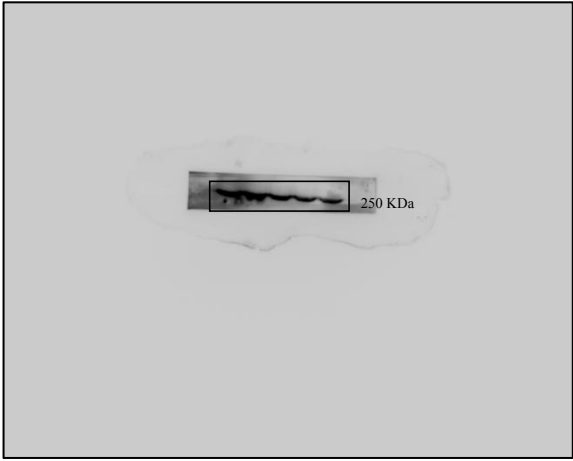

IP: MYC



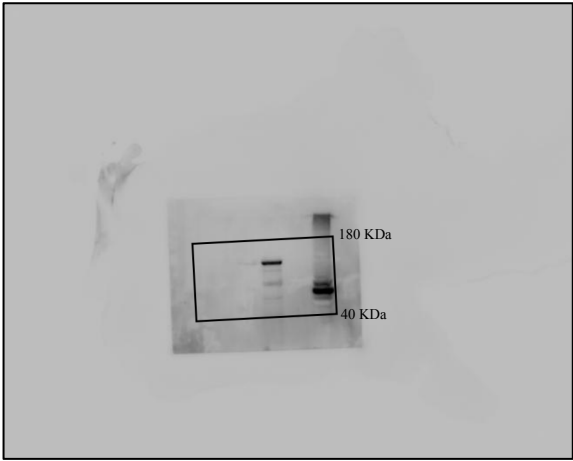

Input: Flag

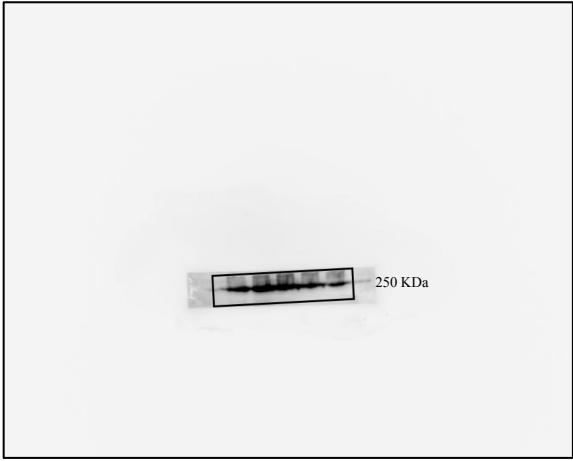

Input: MYC

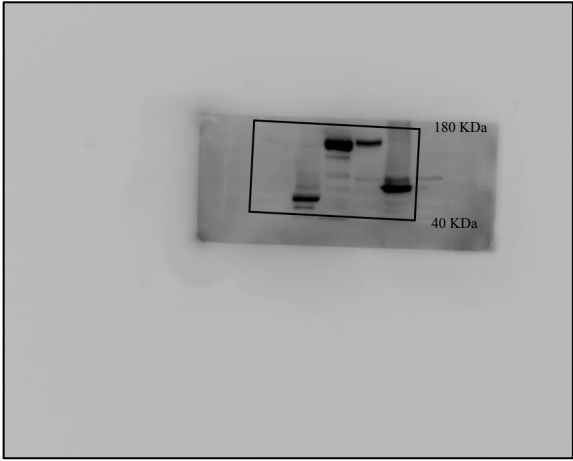

Input: GAPDH

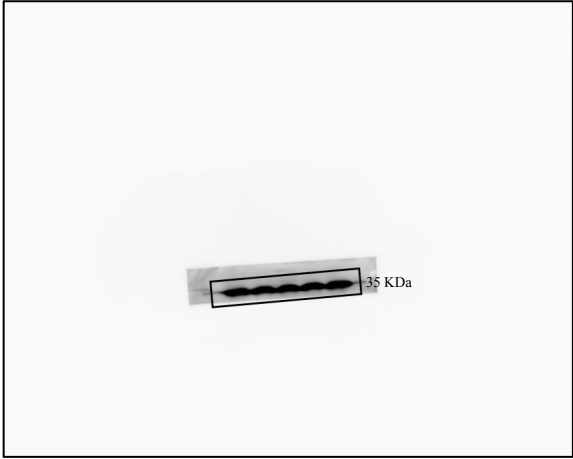

Figure S5D

TRIM56

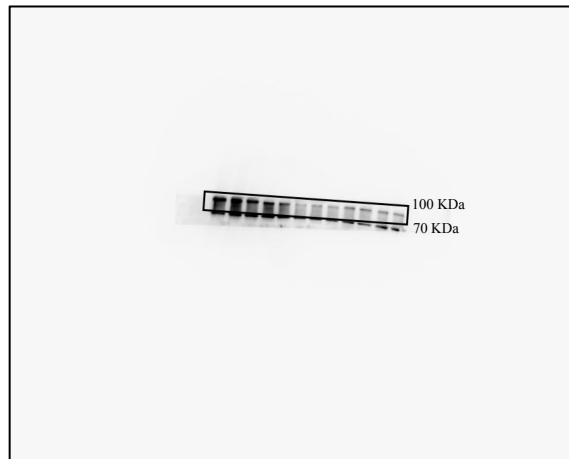

GAPDH

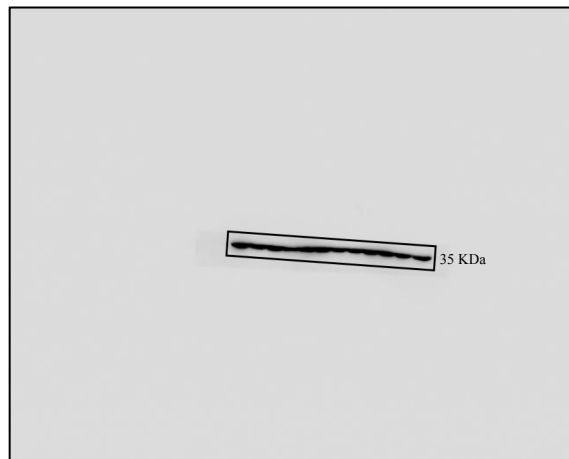

USP5

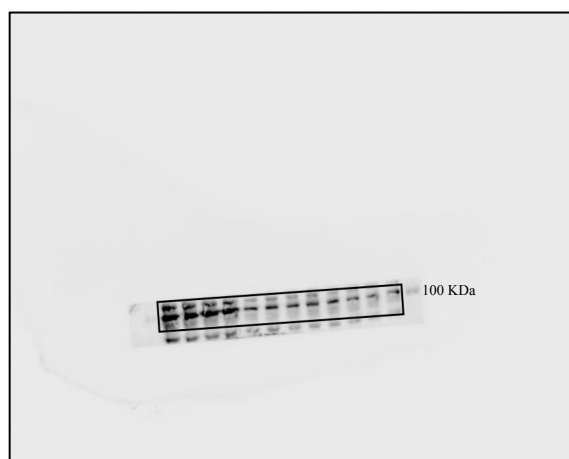

GAPDH

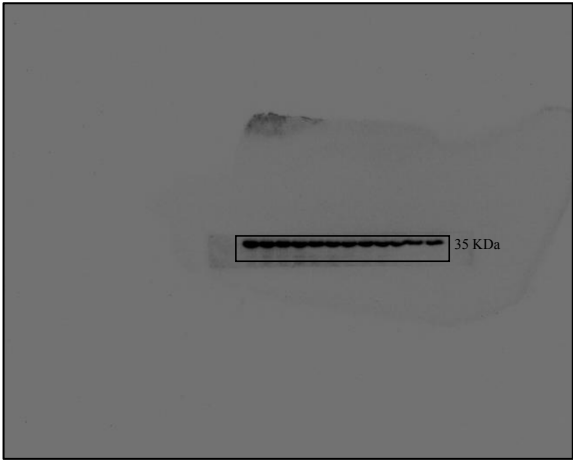

TRIM25

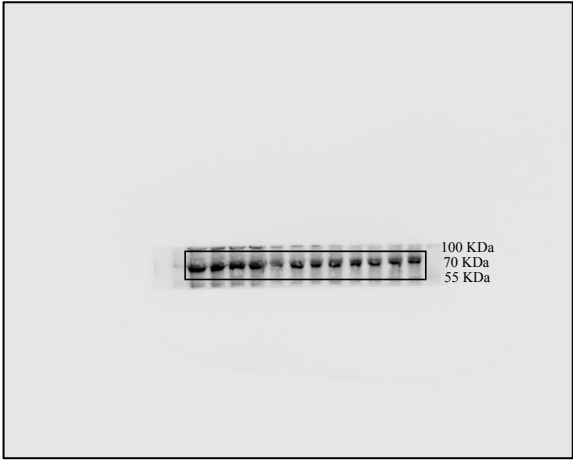

GAPDH

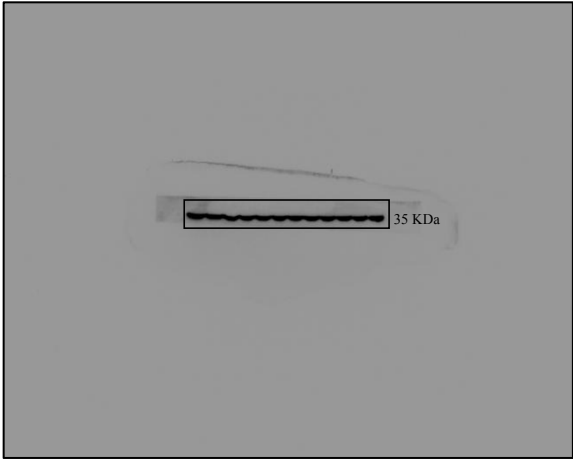

**Figure S5E**

ATR

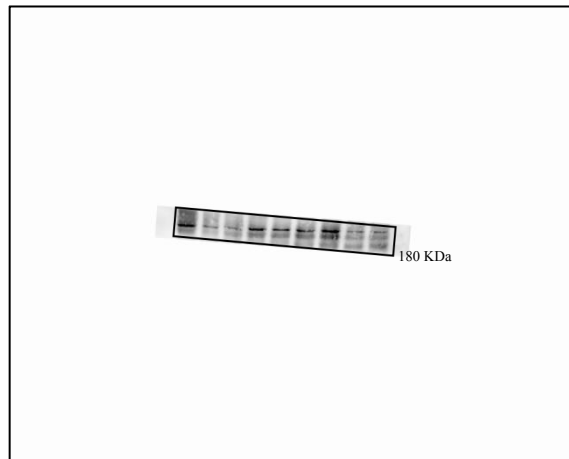

GAPDH

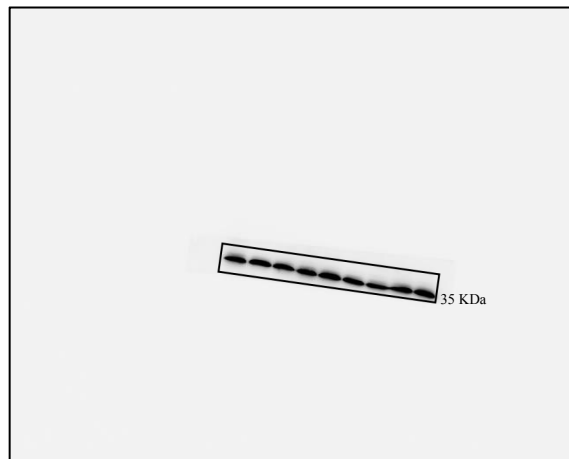

Figure S5F

ATR

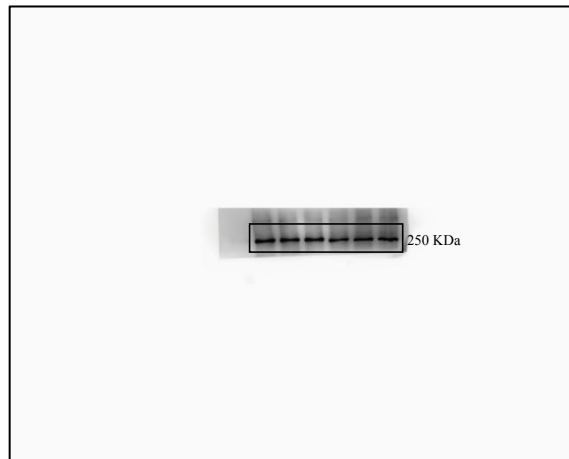

GAPDH

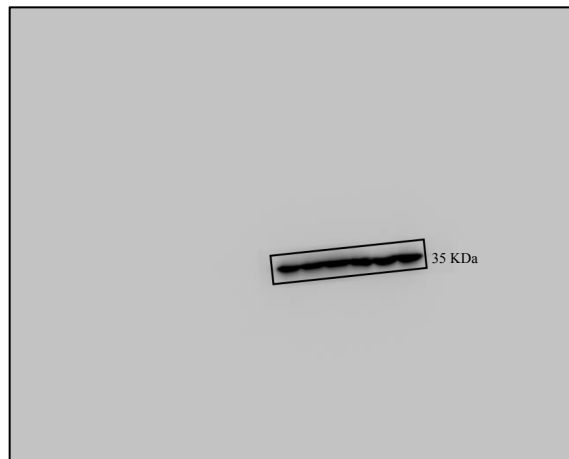

ATR

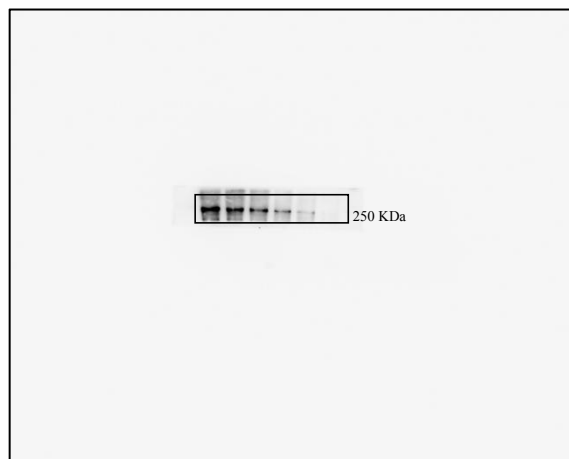

GAPDH

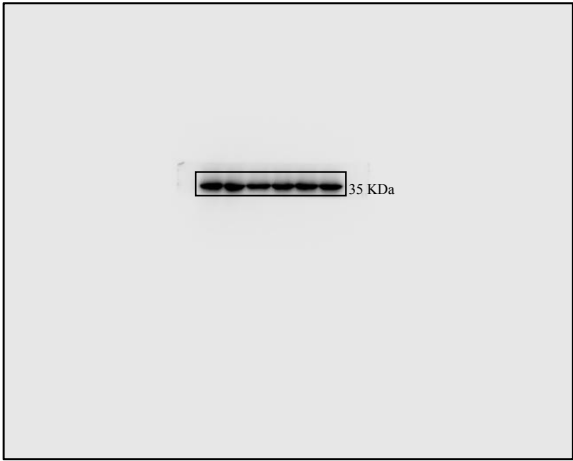

ATR

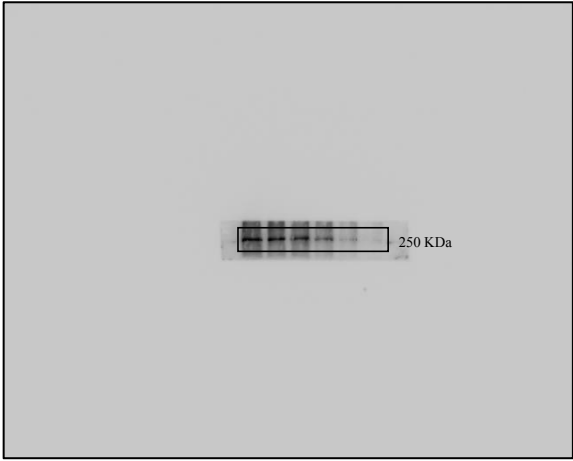

GAPDH

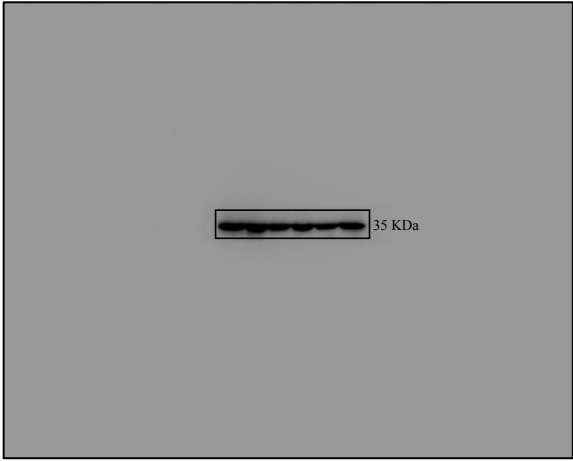

**Figure S5H**

IB: K63-Ub

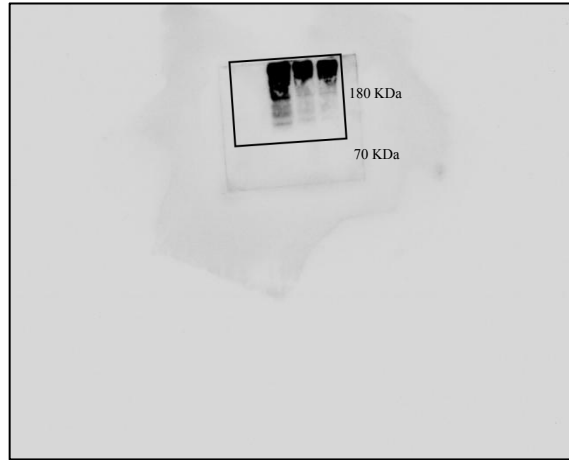

IB: ATR

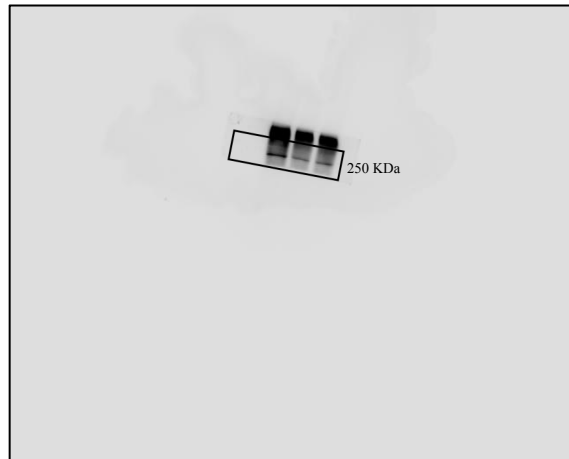

Input: ATR

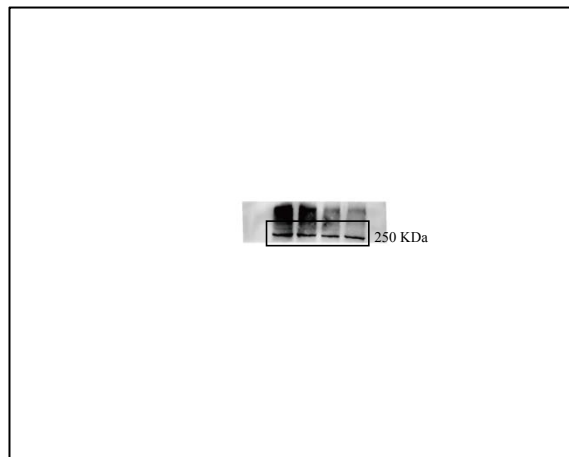

Input: GAPDH



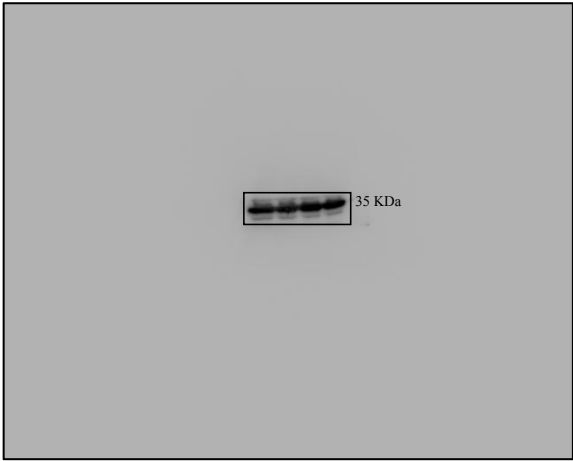

Input: K63-Ub

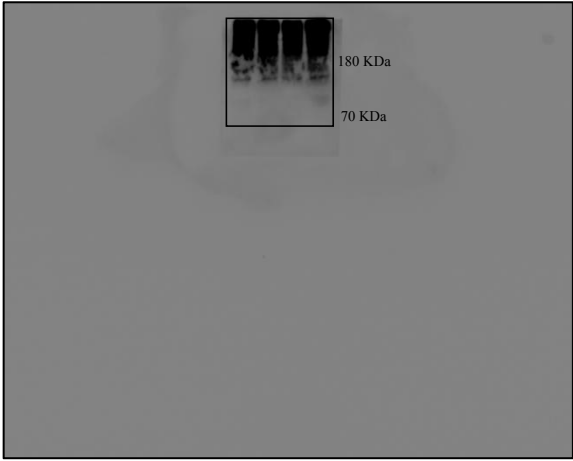

IB: K48-Ub

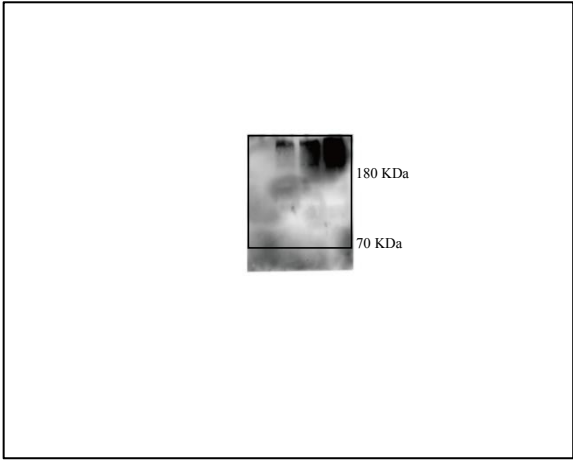

IB: ATR

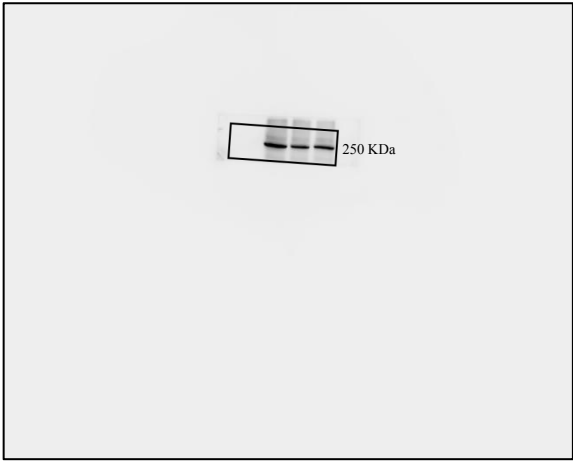

Input: ATR

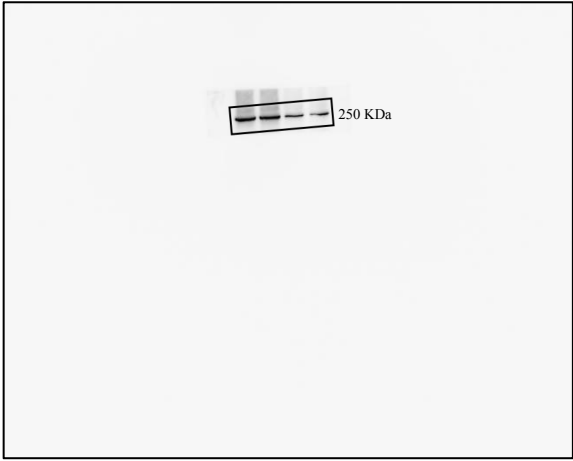

Input: GAPDH

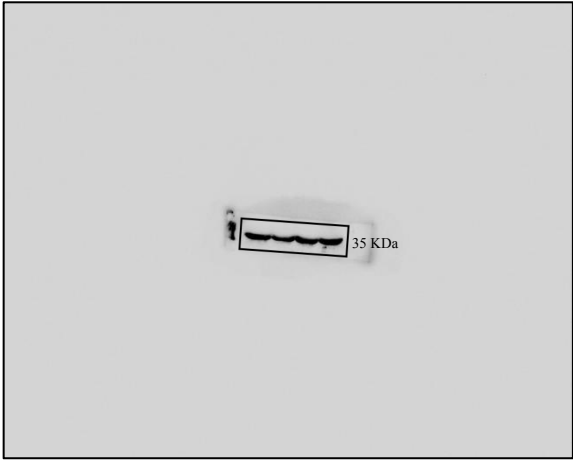

Input: K48-Ub

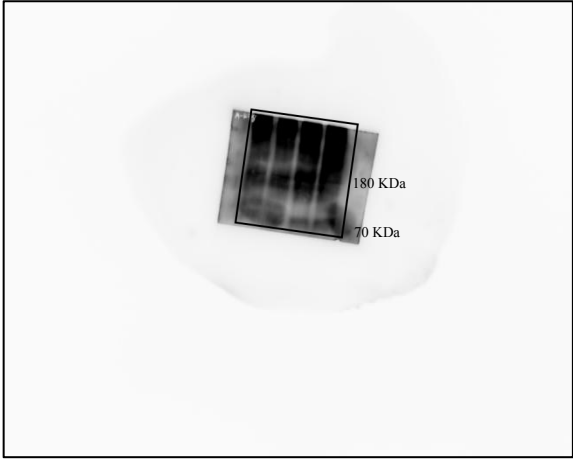

**Figure S5I**

IB: K63-Ub

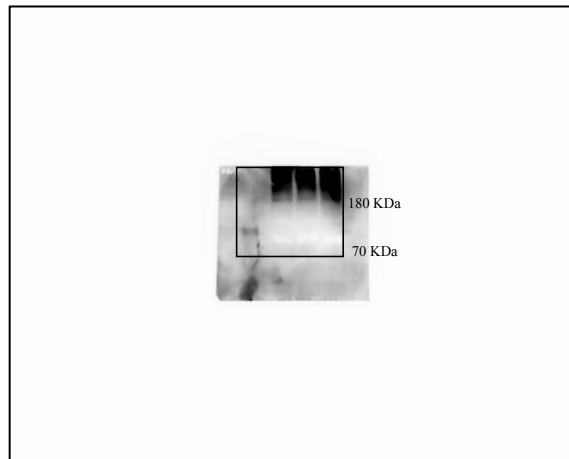

IB: STING

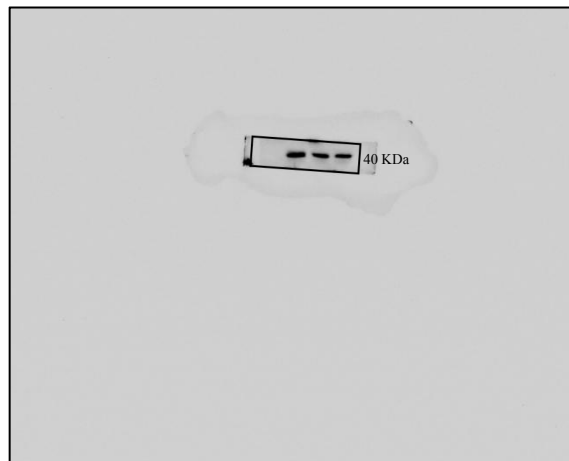

Input: K63-Ub

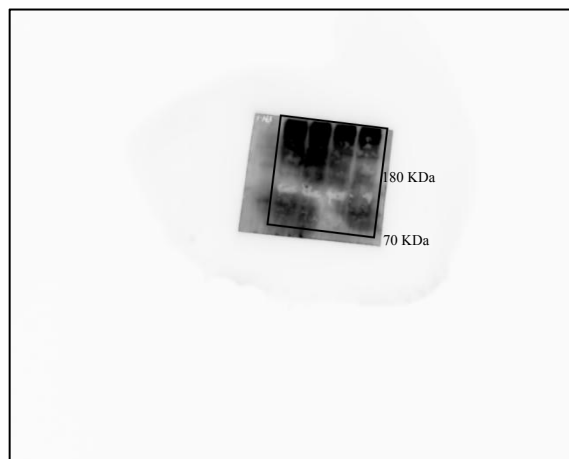

Input: STING

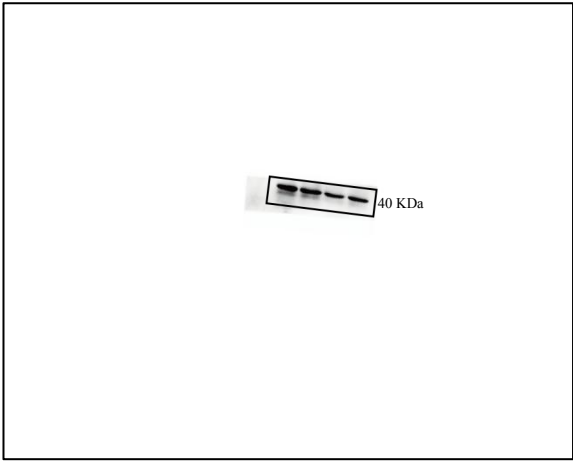

Input: GAPDH

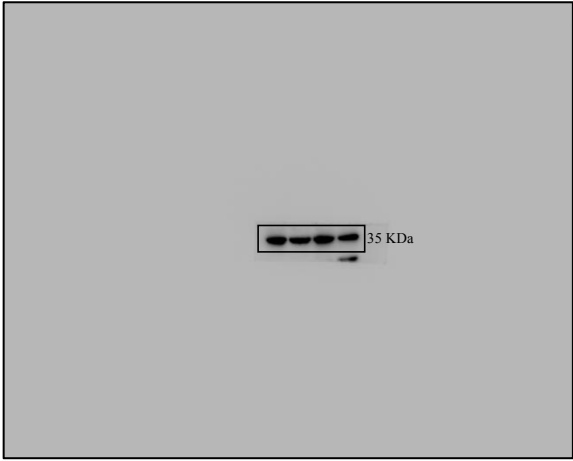

IB: Ub

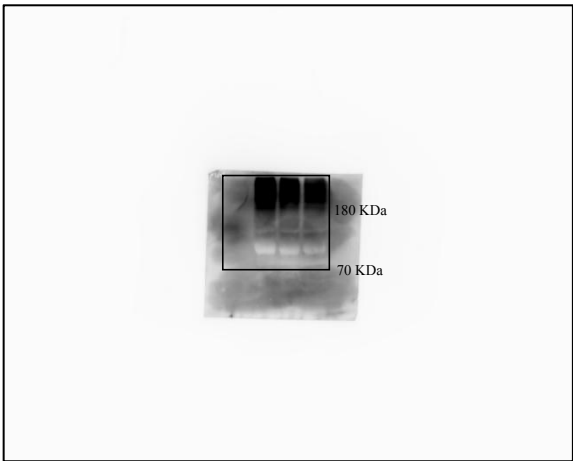

IB: STING

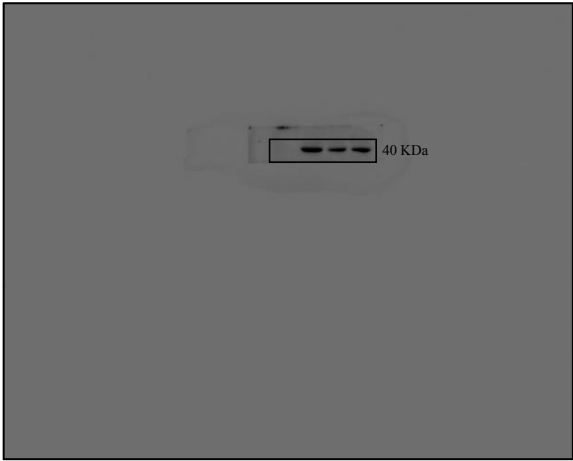

Input: Ub

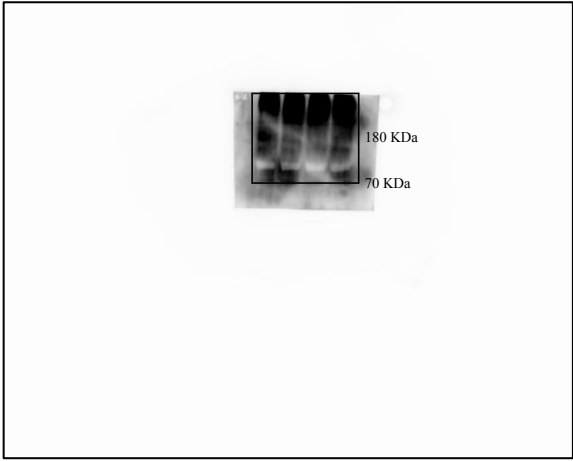

Input: STING

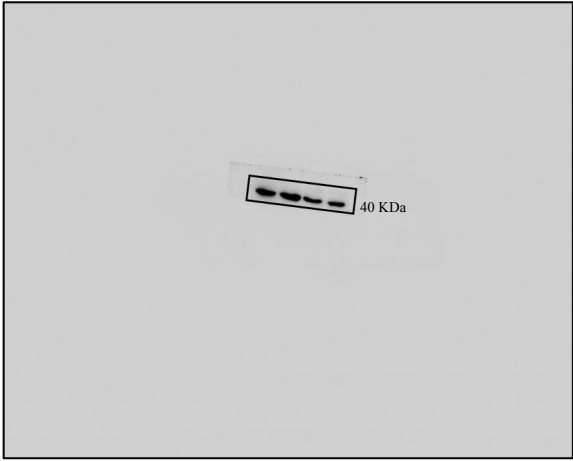

Input: GAPDH

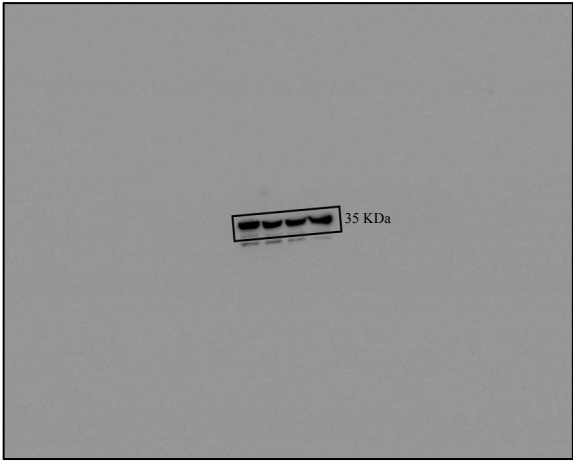

**Figure S5J**

ATR

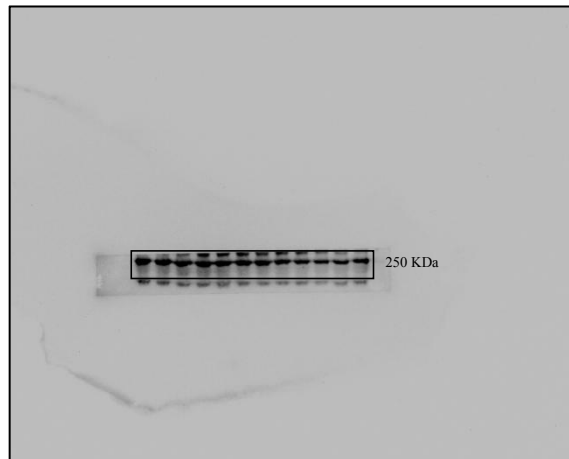

GAPDH

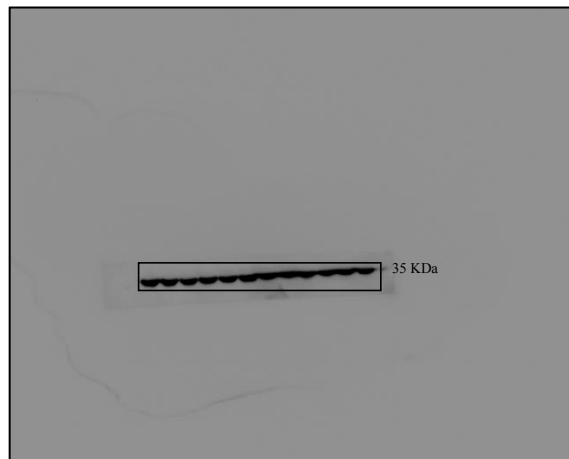



**Figure S5K**

ATR

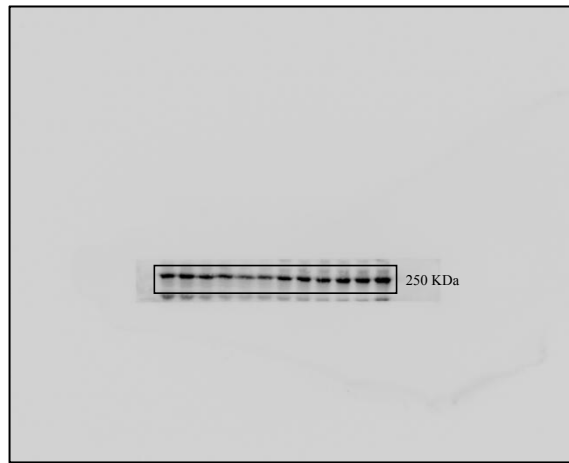

GAPDH

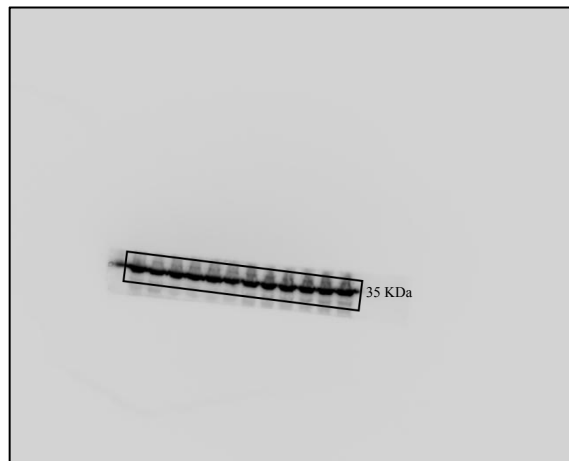

**Figure S5L**

ATR

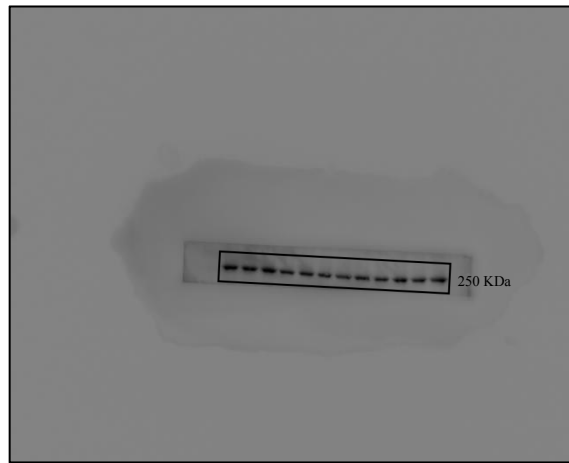

GAPDH

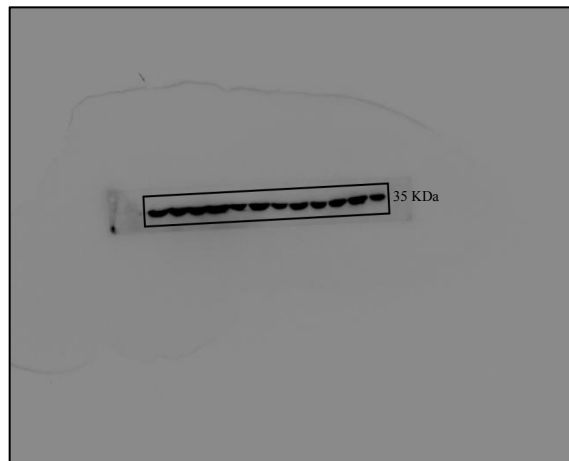

**Figure S5M**

ATR

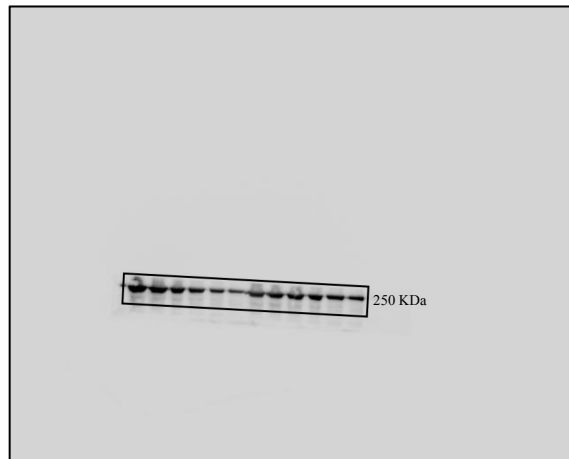

GAPDH

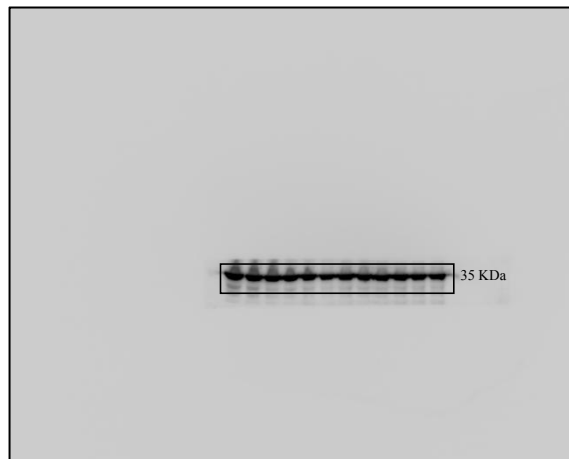

**Figure S5P**

ATR

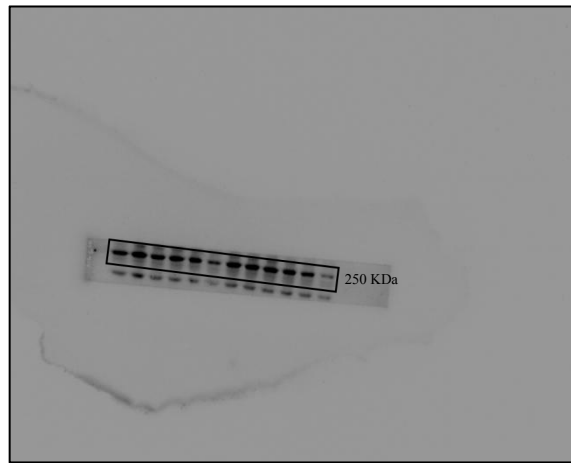

GAPDH

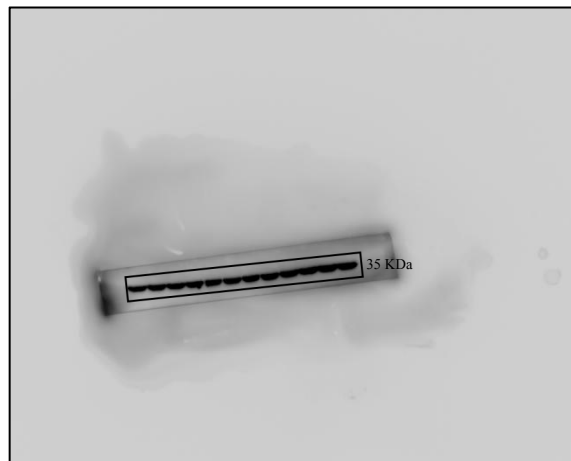

**Figure S5Q**

ATR

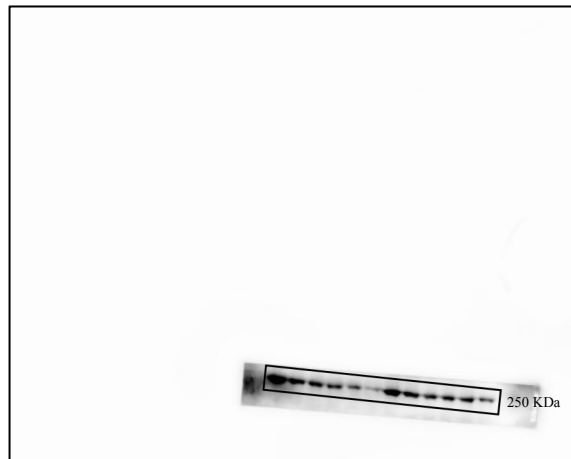

GAPDH

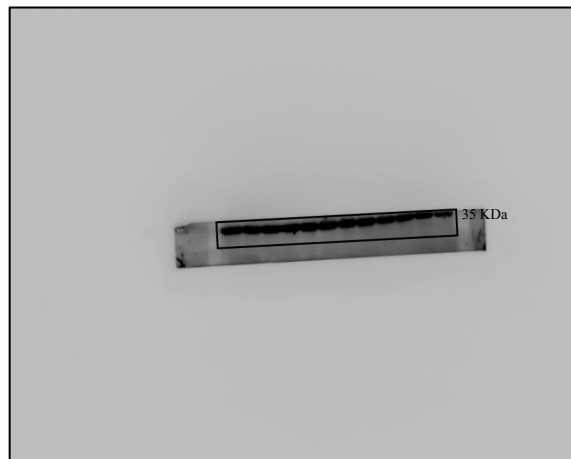

Figure S5R

ATR

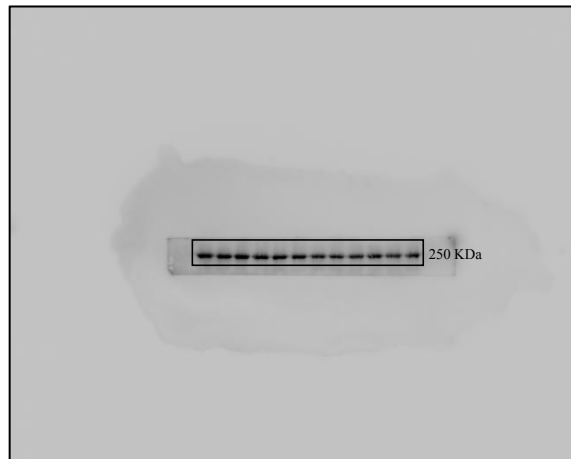

GAPDH

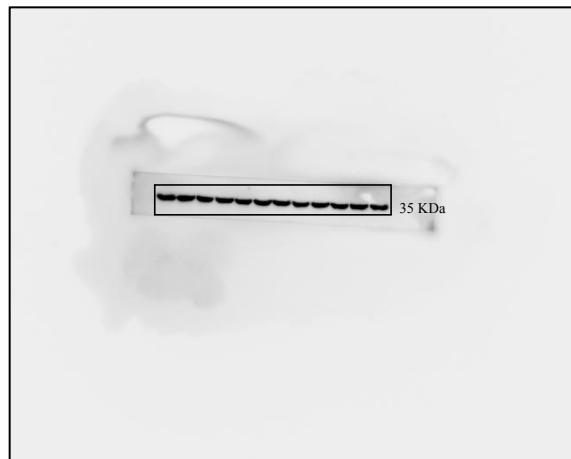

Figure S5S

ATR

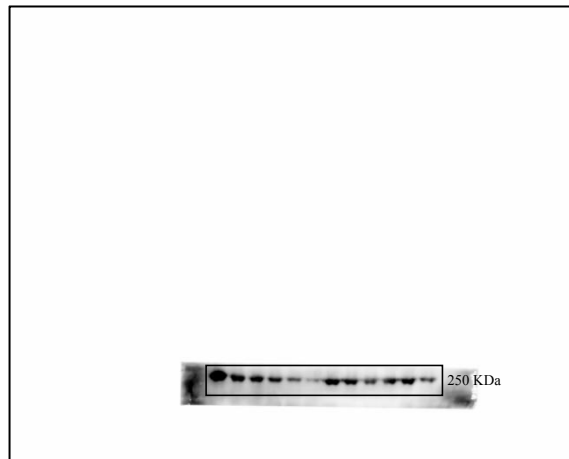

GADPH

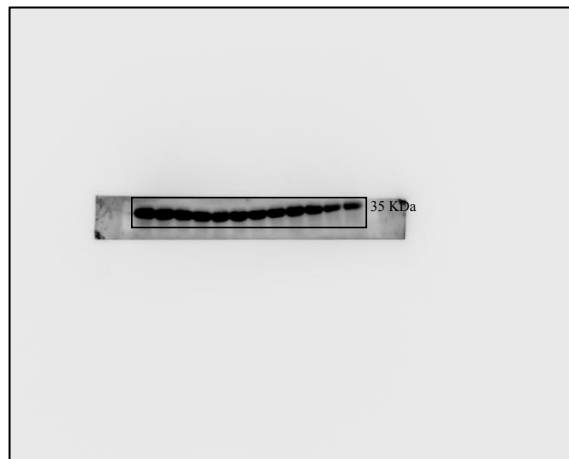

**Figure S5V**

K63-Ub

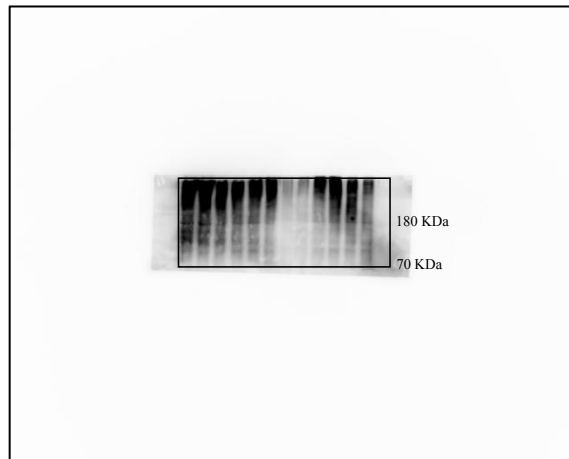

K48-Ub

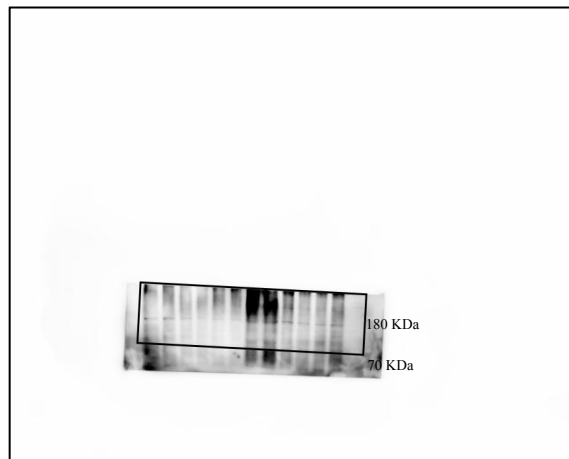

IP: ATR

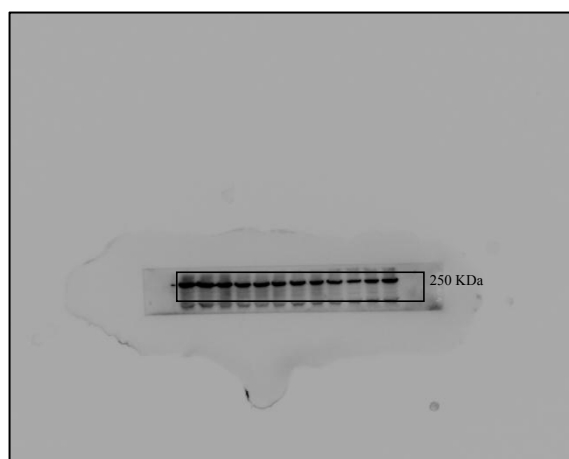

Input: ATR



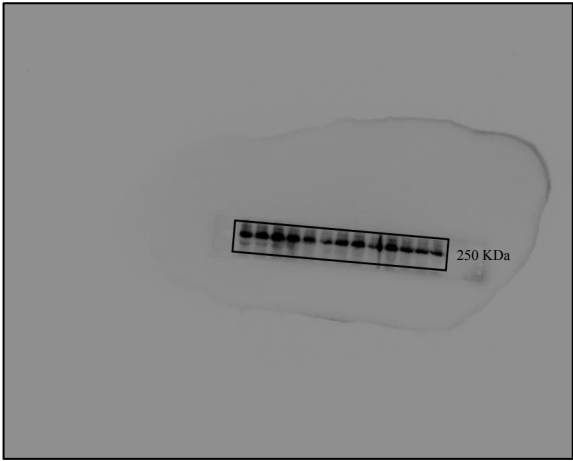

Input: GAPDH

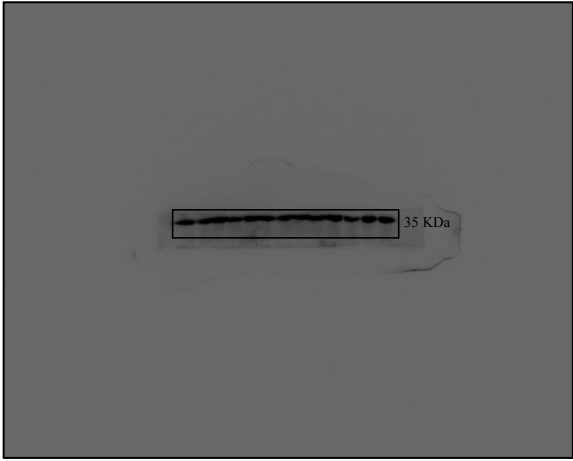

**Figure S5W**

K63-Ub

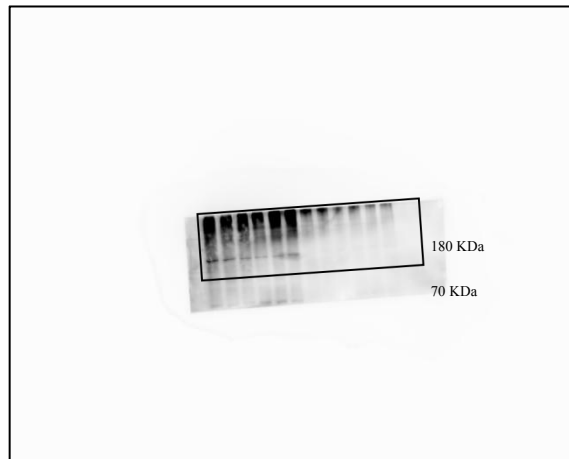

K48-Ub

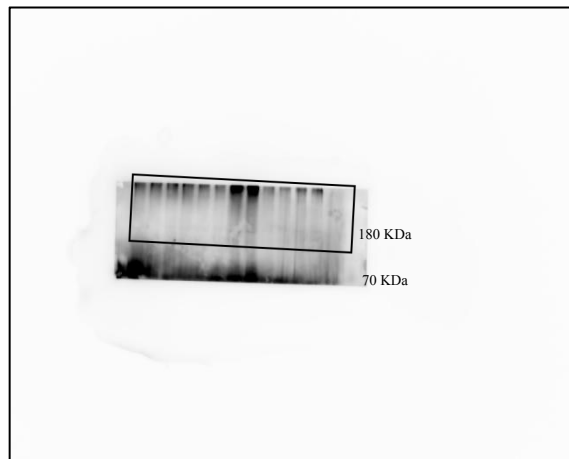

IP: ATR

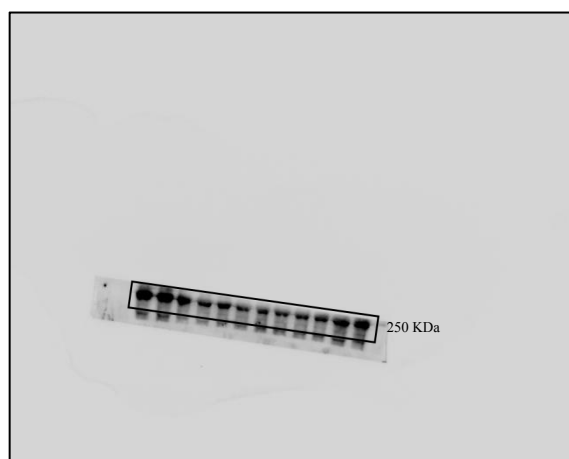

Input: ATR

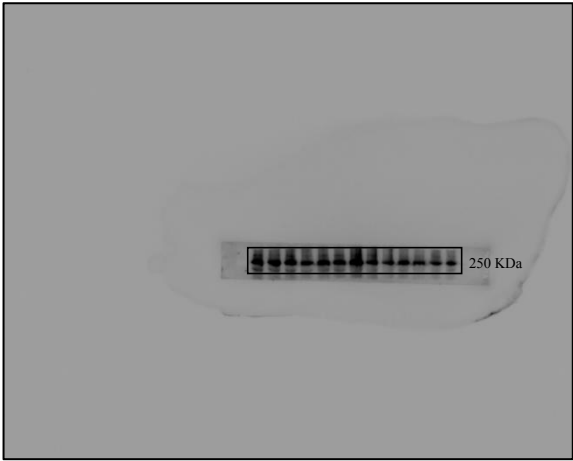

Input: GAPDH

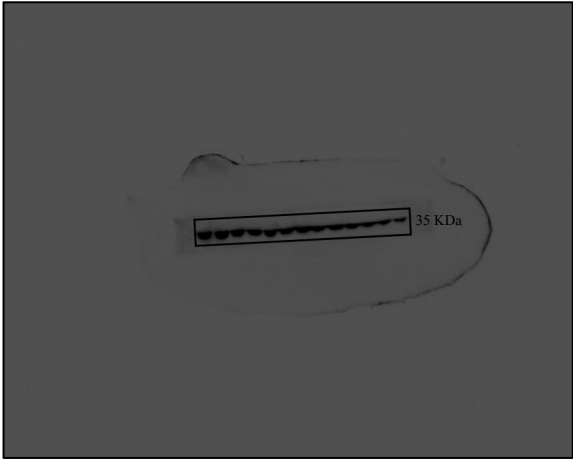

Figure S5X

K63-Ub

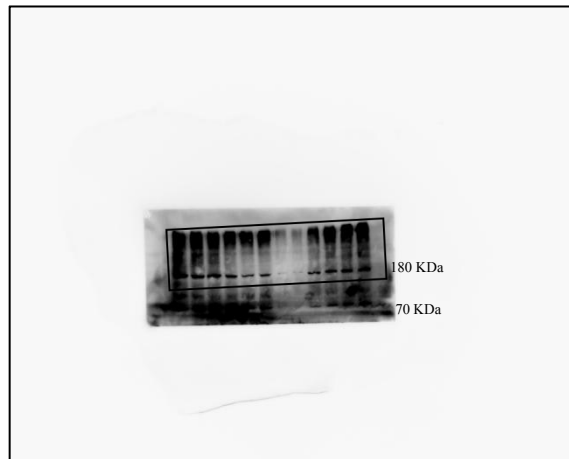

K48-Ub

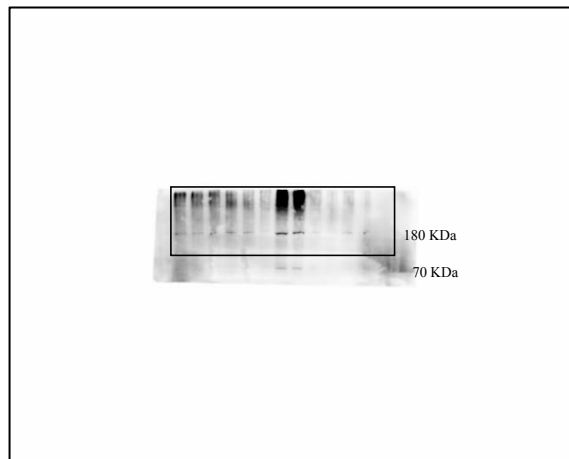

IP: ATR

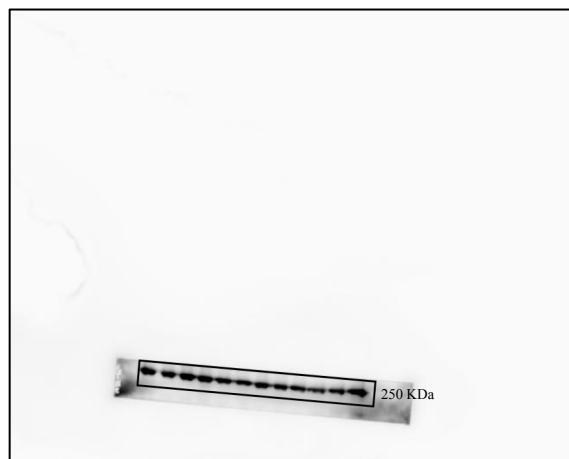

Input: ATR

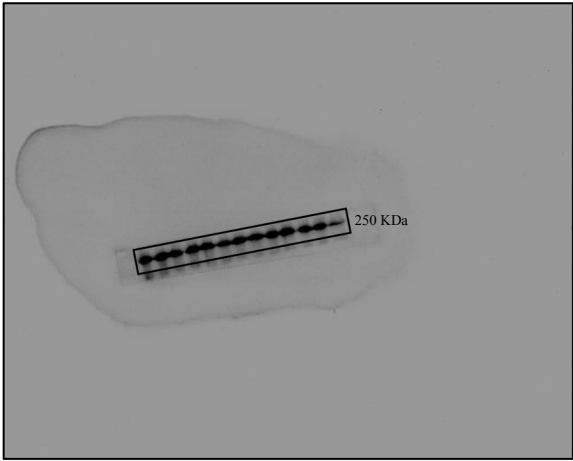

Input: GAPDH

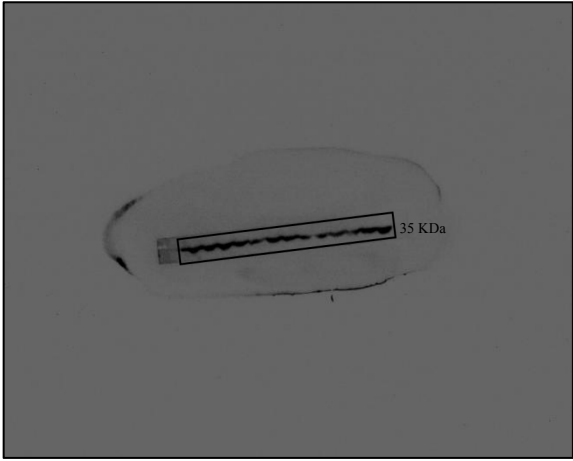

**Figure S5Y**

K63-Ub

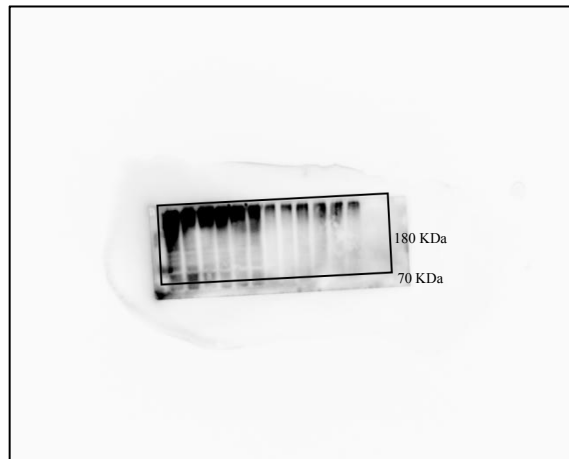

K48-Ub

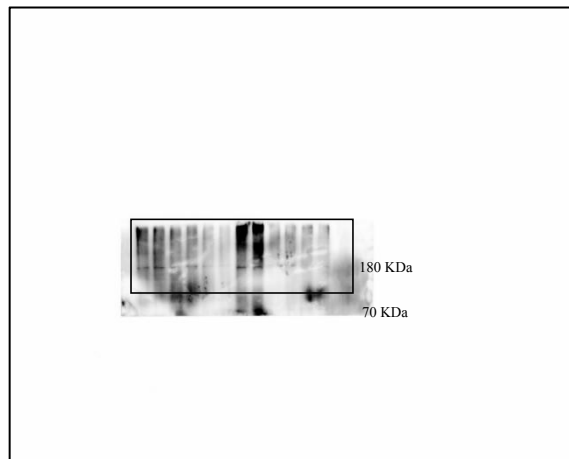

IP: ATR

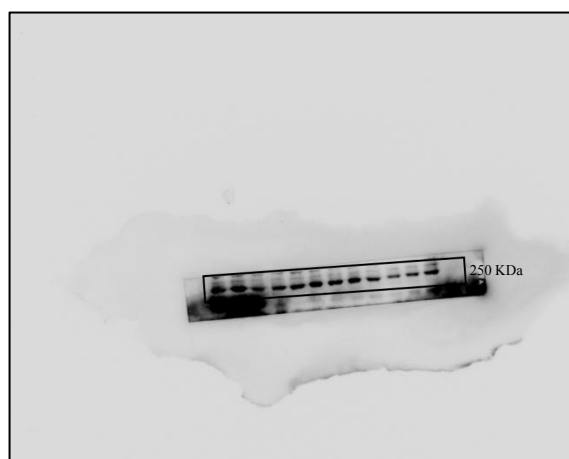

Input: ATR

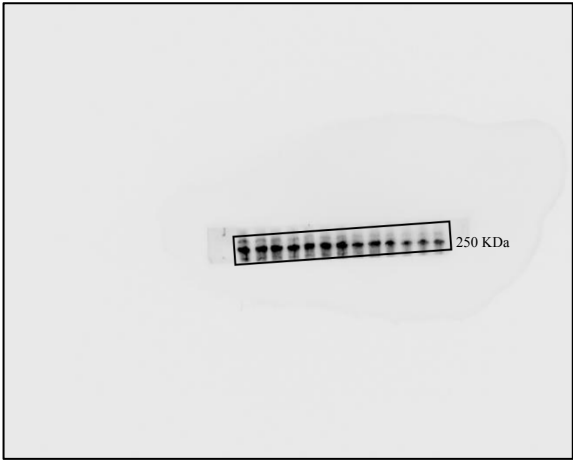

Input: GAPDH

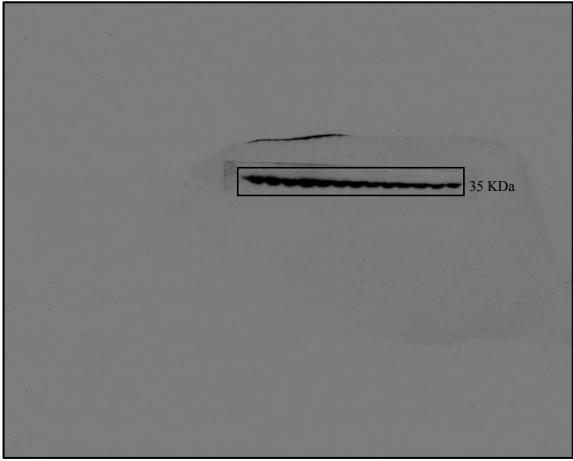

Figure S6A

ATR

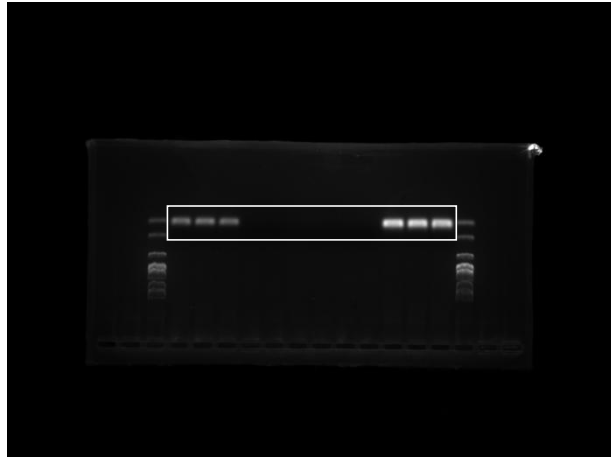

TSG101

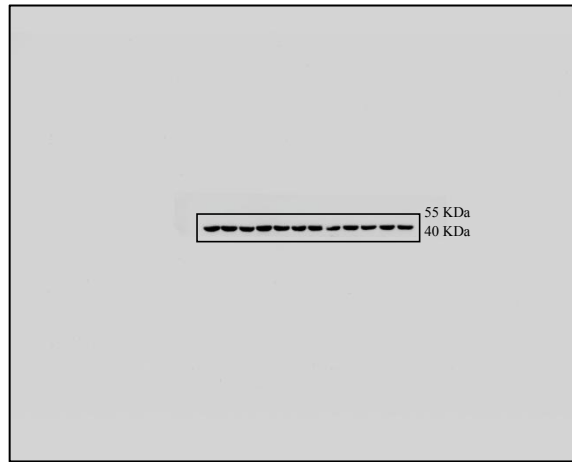

CD63

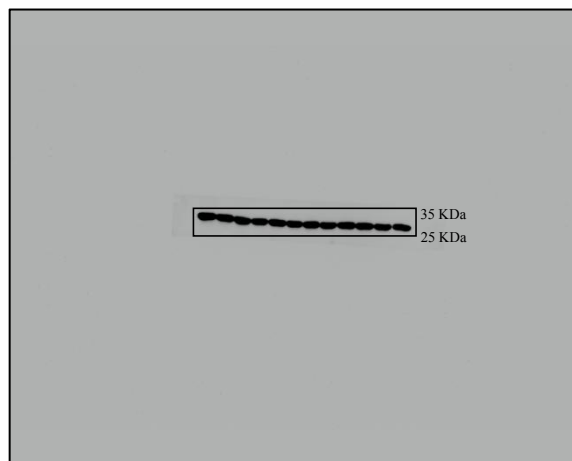

CD9



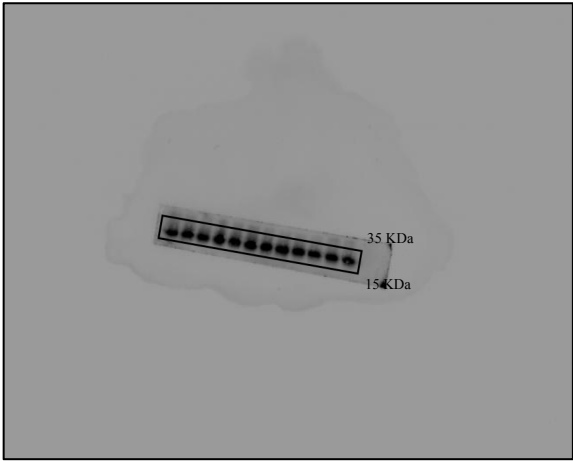

GAPDH

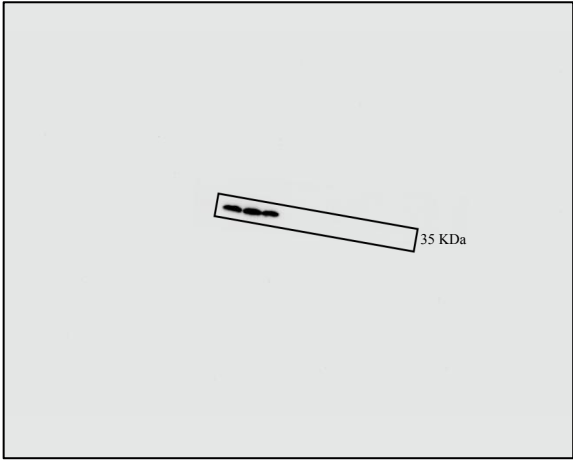

ATR

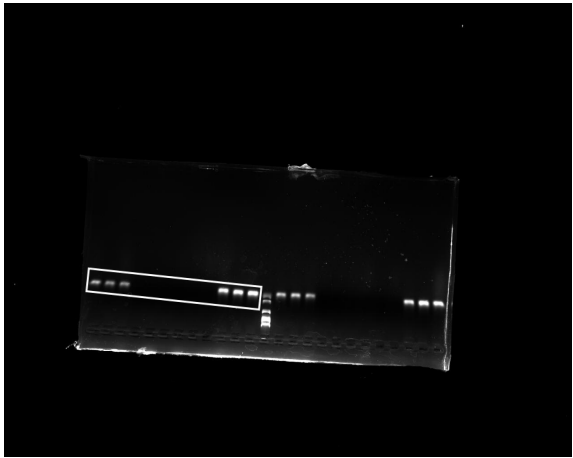

TSG

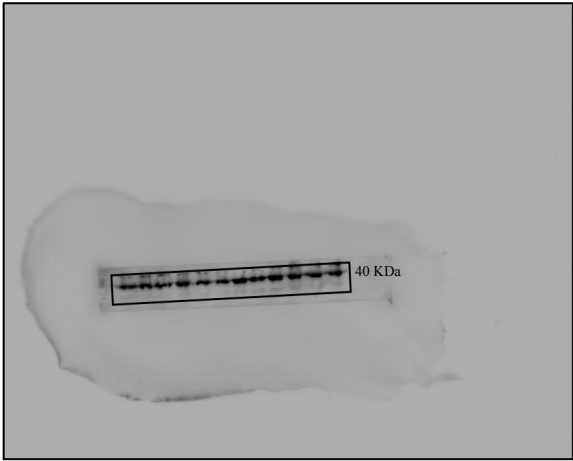

CD63

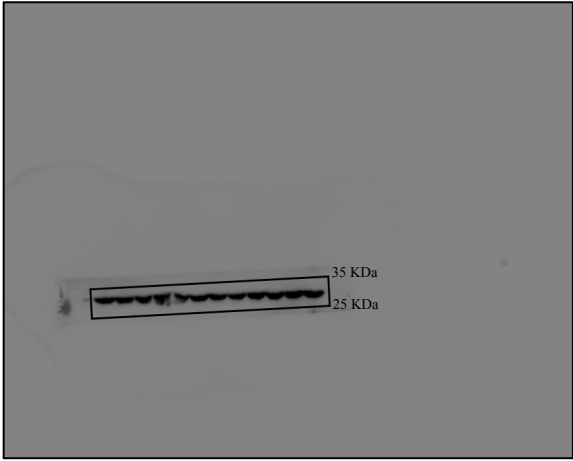

CD9

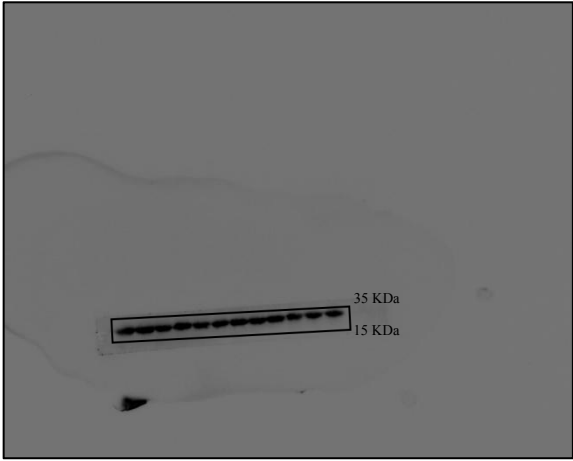

GAPDH

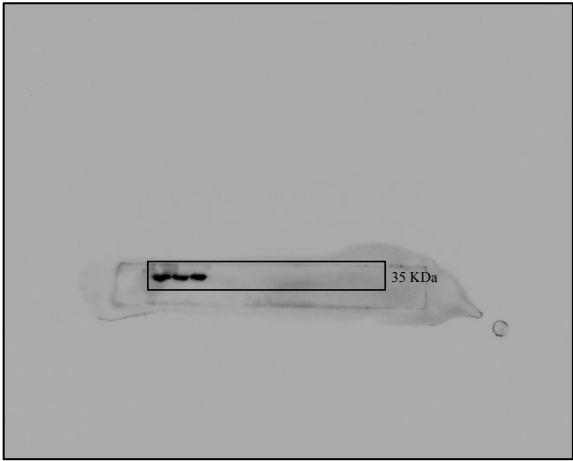

**Figure S6E**

p-p53

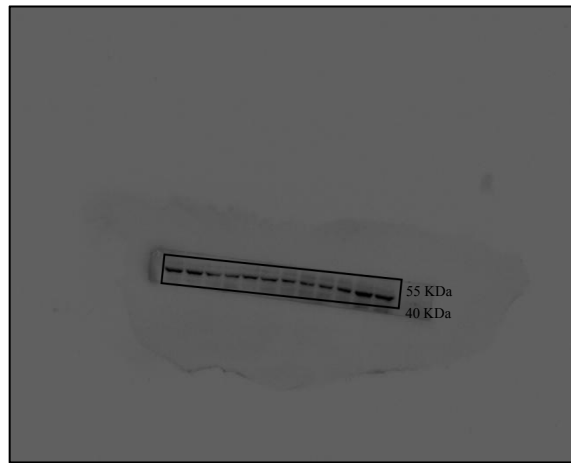

p21

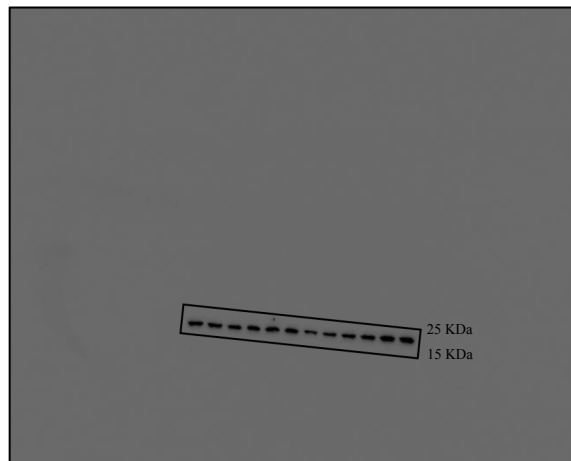

p16

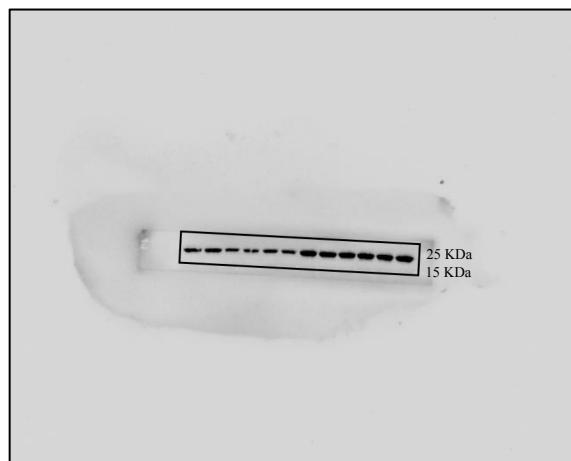

GAPDH

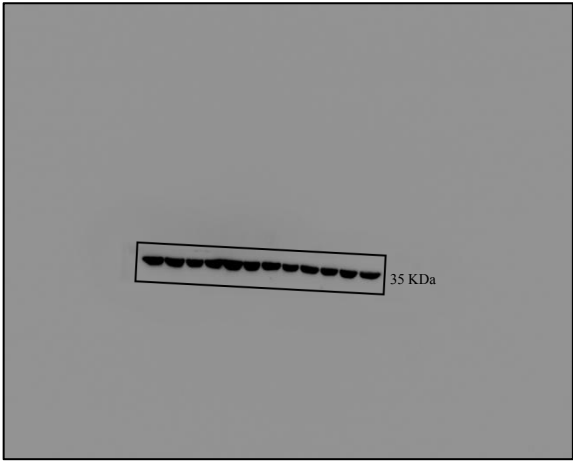

Figure S6F

cGAS

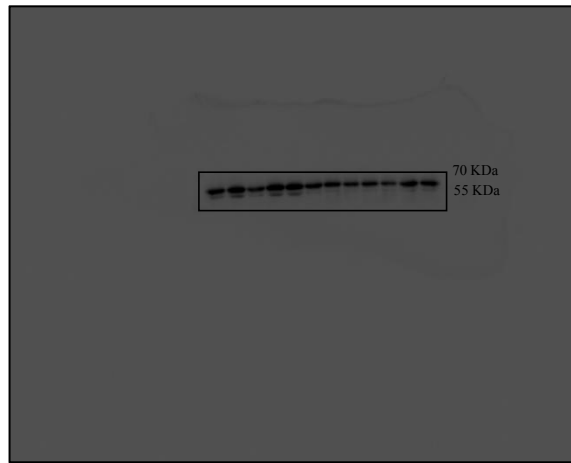

p-STING

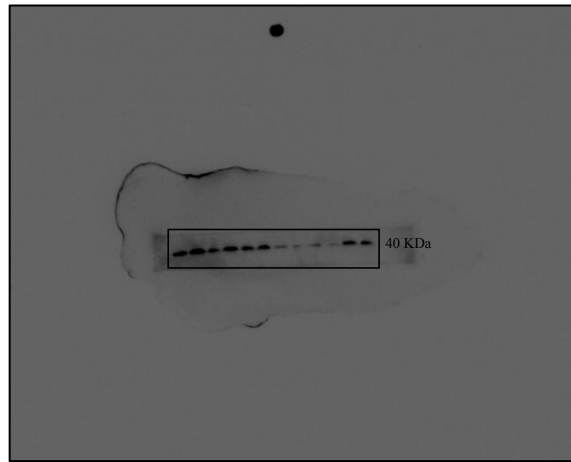

STING

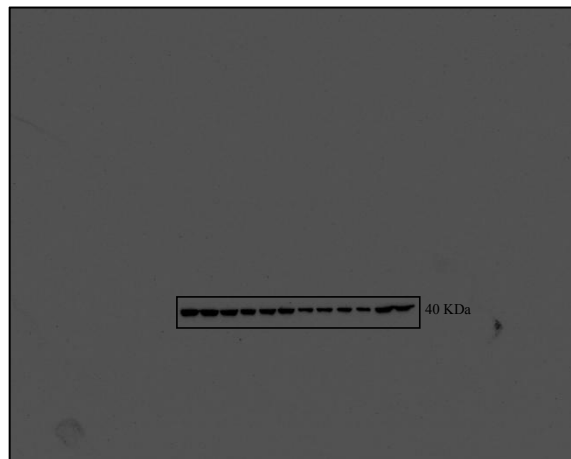

$\gamma$ H2A

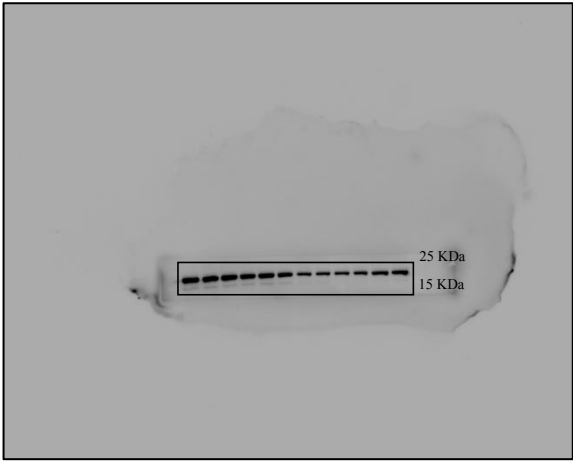

GAPDH

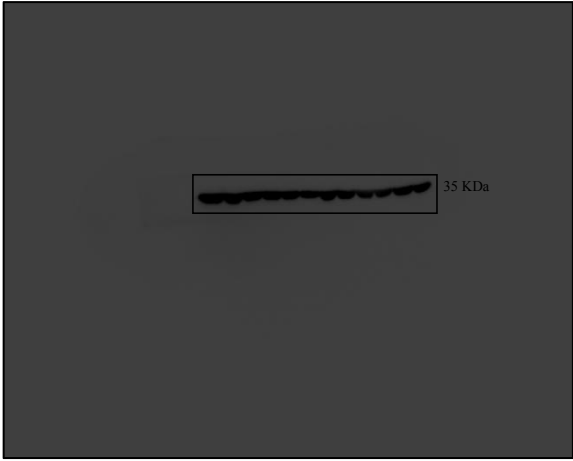

**Figure S6H**

p-p53

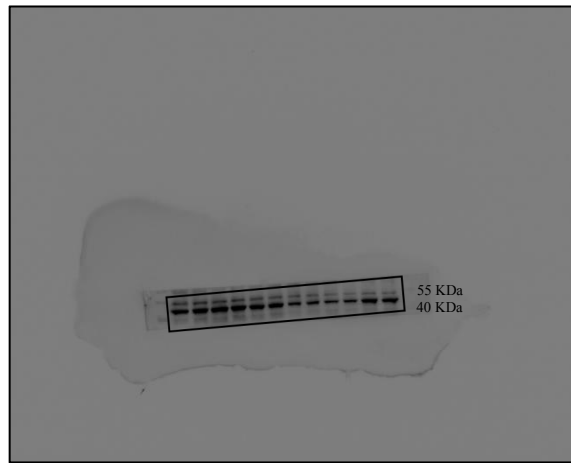

p21

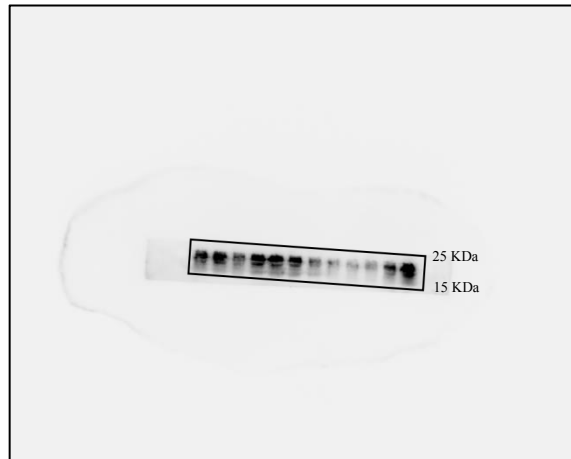

p16

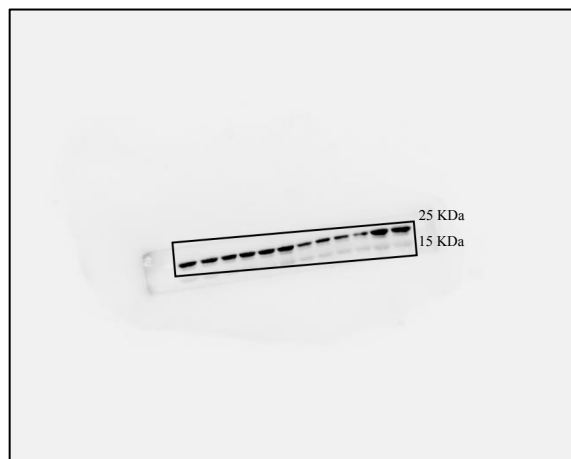

GAPDH



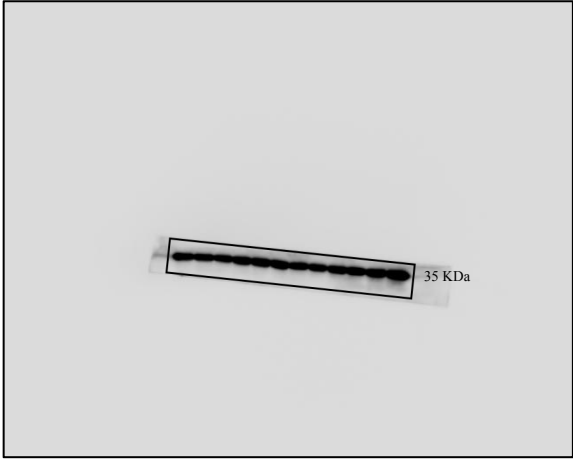

**Figure S6I**

cGAS

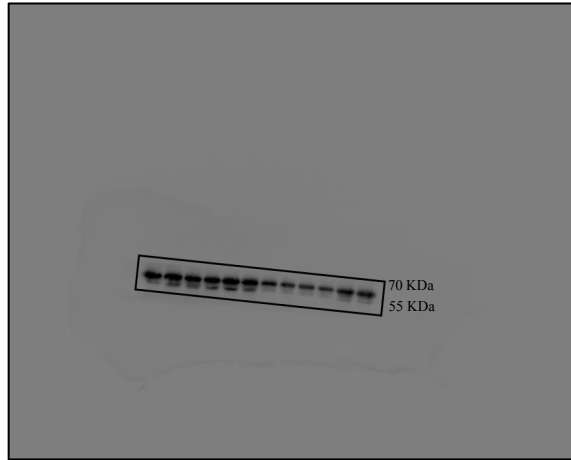

p-STING

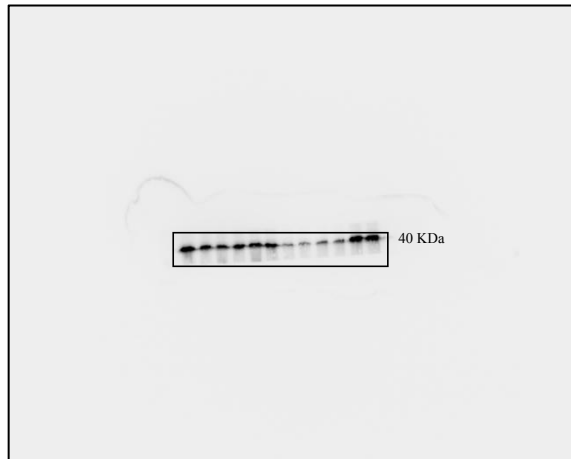

STING

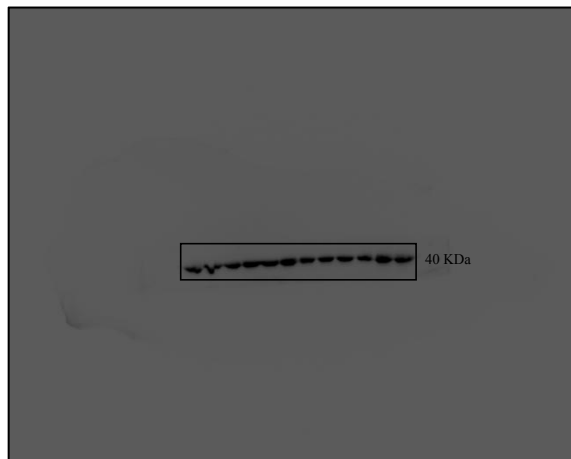

$\gamma$ H2A

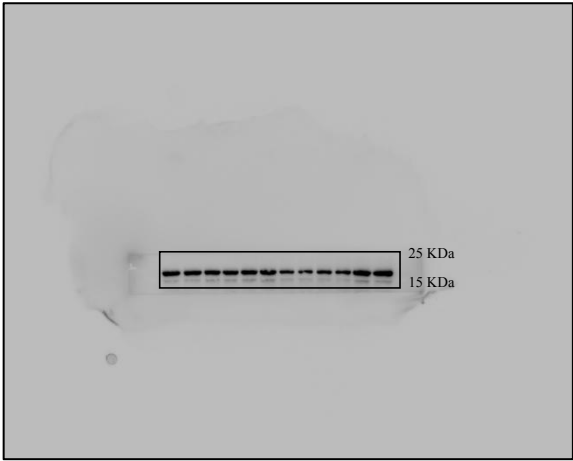

GAPDH

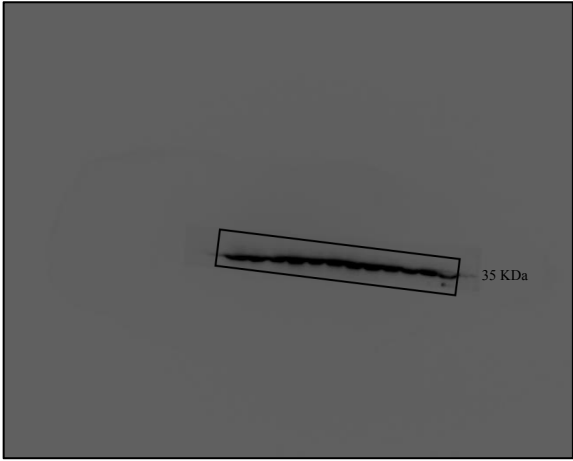

Supplement: jci-134-165140-s271.pdf [file jci-134-165140-s271.pdf]
